# Supplementary material for: Phosphine-mediated sequential annulations of allenyl ketone and isocyanide: a bicyclization strategy to access a furan-fused eight-membered ring and a spirocycle
Source: Royal Society of Chemistry journal article supplement (doi:10.1039/c9cc06267j), 2019-01-01

# **Phosphine-mediated sequential annulations of allenyl ketone and isocyanide: a bicyclization strategy to access furan-fused eight-membered ring and spirocycle**

Bingxiang Xue,<sup>†</sup> Shikuan Su,<sup>†</sup> Yongmei Cui,<sup>\*,†</sup> Youwen Fei,<sup>†</sup> Xueshun Jia,<sup>†,‡</sup> Jian Li,<sup>\*,†</sup> and Jianhui Fang

<sup>†</sup> Department of Chemistry, Center for Supramolecular Chemistry and Catalysis, College of Sciences & Institute for Sustainable Energy, Shanghai University, 99 Shangda Road, Shanghai 200444, P. R. China.

<sup>‡</sup> State Key Laboratory of Applied Organic Chemistry, Lanzhou University, Lanzhou 730000, P. R. China.

E-mail: ymcui@shu.edu.cn; lijian@shu.edu.cn

## **Supporting Information**

### **Table of Contents**

|          |                                                                          |            |
|----------|--------------------------------------------------------------------------|------------|
| <b>1</b> | <b>General Information</b>                                               | <b>S2</b>  |
| <b>2</b> | <b>General Procedure</b>                                                 | <b>S2</b>  |
| <b>3</b> | <b>Characterization Data</b>                                             | <b>S3</b>  |
|          | Spectroscopic Data of All Compounds                                      | S3         |
| <b>4</b> | <b>Preliminary Mechanistic Study and Control Experiment</b>              | <b>S16</b> |
| <b>5</b> | <b><sup>1</sup>H NMR and <sup>13</sup>C NMR Spectra of All Compounds</b> | <b>S19</b> |

## 1 General Information

The NMR spectra were recorded on Bruker AC-500 spectrometer (500 MHz for  $^1\text{H}$  NMR and 125 MHz for  $^{13}\text{C}$  NMR) with  $\text{CDCl}_3$  as the solvent and TMS as internal reference.  $^1\text{H}$  NMR spectral data were reported as follows: chemical shift ( $\delta$ , ppm), multiplicity, integration, and coupling constant (Hz).  $^{13}\text{C}$  NMR spectral data were reported in terms of the chemical shift. The following abbreviations were used to indicate multiplicities: s = singlet; d = doublet; t = triplet; q = quartet; m = multiplet. Low-resolution mass spectra were obtained on a Shimadzu LCMS-2010EV spectrometer in ESI mode and reported as m/z. High-resolution mass spectra (HRMS) were recorded on a Bruker Daltonics, Inc. APEXIII 7.0 TESLA FTMS instrument. Melting points were obtained on a X-4 digital melting point apparatus without correction. Purification of products was accomplished by column chromatography packed with silica gel. Unless otherwise stated, all reagents were commercially purchased and used without further purification. Enantiomeric excesses were determined by chiral HPLC using a Shimadzu instrument.

## 2 General Procedure

Under air atmosphere, a sealable reaction tube with a Teflon-coated screw cap equipped with a magnetic stir bar was charged with isocyanide **1** (0.5 mmol), allenyl ketone **2** (0.5mmol) and triphenylphosphine (1.0 equiv.) in THF (5.0 mL) at room temperature. The rubber septum was then replaced by a Teflon-coated screw cap, and the reaction vessel placed in an oil bath at 130 °C for 12 h. After the reaction was completed, it was cooled to room temperature and monitored by TLC. The solvent was then removed under reduced pressure and the residue was purified by column chromatography on silica gel to afford product **3-4**.

### 3 Characterization Data

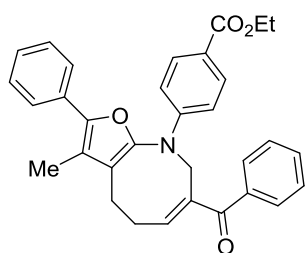

**(3a)**: 90.4 mg, 75% yield, yellow oil.  $^1\text{H}$  NMR (500 MHz,  $\text{CDCl}_3$ ):  $\delta$  (ppm) = 7.96 (d,  $J$  = 8.8 Hz, 2H), 7.64-7.61 (m, 4H), 7.54-7.50 (m, 1H), 7.41 (td,  $J$  = 7.7, 3.8 Hz, 4H), 7.27 (t,  $J$  = 7.4 Hz, 1H), 6.78 (d,  $J$  = 8.9 Hz, 2H), 6.66 (t,  $J$  = 8.4 Hz, 1H), 4.79 (s, 2H), 4.34 (q,  $J$  = 7.1 Hz, 2H), 2.64-2.55 (m, 4H), 2.23 (s, 3H), 1.37 (t,  $J$  = 7.1 Hz, 3H).  $^{13}\text{C}$  NMR (125 MHz,  $\text{CDCl}_3$ ):  $\delta$  (ppm) = 198.0, 166.5, 151.7, 145.4, 145.2, 144.7, 138.1, 137.9, 131.9, 131.3, 131.2, 129.3, 128.4, 128.1, 126.9, 125.6, 120.8, 118.2, 117.1, 112.7, 60.3, 49.2, 23.3, 22.8, 14.3, 9.9. HRMS (ESI): calcd. for  $\text{C}_{32}\text{H}_{30}\text{NO}_4$   $[\text{M}+\text{H}]^+$  492.2169, Found: 492.2158.  $R_f$  Value: 0.40 (PE/EA – 5:1).

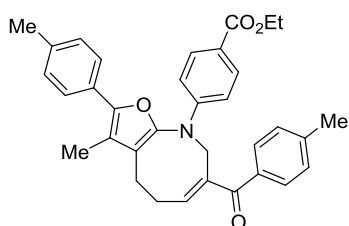

**(3b)**: 83.0 mg, 65% yield, white solid: m.p. 194-195 °C.  $^1\text{H}$  NMR (500 MHz,  $\text{CDCl}_3$ ):  $\delta$  (ppm) = 7.95 (d,  $J$  = 8.9 Hz, 2H), 7.53 (t,  $J$  = 8.5 Hz, 4H), 7.22 (d,  $J$  = 8.0 Hz, 4H), 6.77 (d,  $J$  = 8.9 Hz, 2H), 6.63 (t,  $J$  = 8.5 Hz, 1H), 4.77 (s, 2H), 4.34 (q,  $J$  = 7.1 Hz, 2H), 2.63-2.53 (m, 4H), 2.40 (s, 3H), 2.37 (s, 3H), 2.21 (s, 3H), 1.37 (t,  $J$  = 7.1 Hz, 3H).  $^{13}\text{C}$  NMR (125 MHz,  $\text{CDCl}_3$ ):  $\delta$  (ppm) = 197.8, 196.5, 151.9, 145.6, 144.4, 144.2, 142.7, 138.2, 136.7, 135.1, 131.2, 129.6, 129.1, 128.8, 128.6, 125.6, 120.7, 118.2, 116.4, 112.7, 60.3, 49.4, 23.2, 22.9, 21.5, 21.1, 14.3, 9.9. HRMS (ESI): calcd. for  $\text{C}_{34}\text{H}_{34}\text{NO}_4$   $[\text{M}+\text{H}]^+$  520.2482, Found: 520.2473.  $R_f$  Value: 0.42 (PE/EA – 5:1).

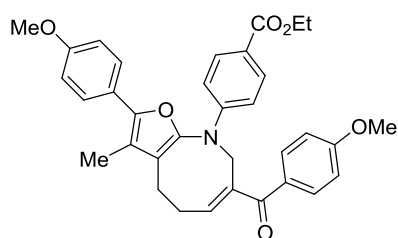

**(3c)**: 63.0 mg, 40% yield, yellow oil.  $^1\text{H}$  NMR (500 MHz,  $\text{CDCl}_3$ ):  $\delta$  (ppm) = 7.95-7.92 (m, 2H), 7.66-7.63 (m, 2H), 7.56-7.53 (m, 2H), 6.95-6.88 (m, 4H), 6.77-6.74 (m, 2H), 6.55 (t,  $J$  = 8.5 Hz, 1H),

4.73 (s, 2H), 4.32 (q,  $J = 7.1$  Hz, 2H), 3.84 (s, 3H), 3.82 (s, 3H), 2.62-2.51 (m, 4H), 2.19 (s, 3H), 1.36 (t,  $J = 7.1$  Hz, 3H).  $^{13}\text{C}$  NMR (125 MHz,  $\text{CDCl}_3$ ):  $\delta$  (ppm) = 196.9, 166.6, 162.9, 158.6, 151.9, 145.5, 144.2, 142.6, 138.2, 131.9, 131.2, 130.2, 127.1, 124.2, 120.7, 118.2, 115.6, 113.9, 113.4, 112.7, 60.3, 55.4, 55.2, 49.7, 23.2, 23.0, 14.4, 9.9. HRMS (ESI): calcd. for  $\text{C}_{34}\text{H}_{34}\text{NO}_6$   $[\text{M}+\text{H}]^+$  552.2381, Found: 552.2380.  $R_f$  Value: 0.50 (PE/EA – 2:1).

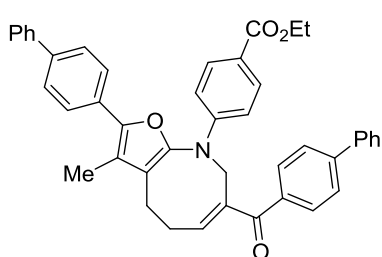

**(3d)**: 93.3 mg, 57% yield, white solid: m.p. 95-96 °C.  $^1\text{H}$  NMR (500 MHz,  $\text{CDCl}_3$ ):  $\delta$  (ppm) = 7.98 (d,  $J = 8.4$  Hz, 2H), 7.74-7.71 (m, 4H), 7.67-7.61 (m, 8H), 7.47 (q,  $J = 7.2$  Hz, 4H), 7.42-7.35 (m, 2H), 6.81 (d,  $J = 8.5$  Hz, 2H), 6.72 (t,  $J = 8.2$  Hz, 1H), 4.82 (s, 2H),

4.35 (q,  $J = 7.1$  Hz, 2H), 2.68-2.61 (m, 4H), 2.29 (s, 3H), 1.38 (t,  $J = 7.1$  Hz, 3H).  $^{13}\text{C}$  NMR (125 MHz,  $\text{CDCl}_3$ ):  $\delta$  (ppm) = 197.7, 166.5, 151.8, 145.2, 144.9, 144.8, 144.7, 140.5, 139.8, 139.5, 138.3, 136.5, 131.3, 130.3, 130.1, 128.9, 128.7, 128.1, 127.3, 127.1, 126.9, 126.8, 125.9, 120.1, 118.4, 117.4, 112.7, 60.3, 49.4, 23.4, 22.9, 14.4, 10.1. HRMS (ESI): calcd. for  $\text{C}_{44}\text{H}_{38}\text{NO}_4$   $[\text{M}+\text{H}]^+$  644.2795, Found: 644.2792.  $R_f$  Value: 0.38 (PE/EA – 5:1).

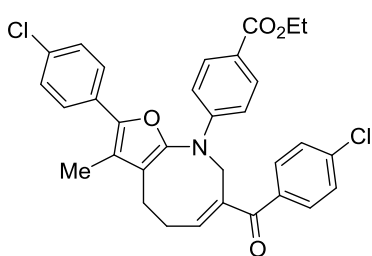

**(3e)**: 44.2 mg, 32% yield, yellow oil.  $^1\text{H}$  NMR (500 MHz,  $\text{CDCl}_3$ ):  $\delta$  (ppm) = 7.95-7.92 (m, 2H), 7.56-7.52 (m, 4H), 7.40-7.35 (m, 4H), 6.74-6.71 (m, 2H), 6.62 (t,  $J = 8.3$  Hz, 1H), 4.74 (s, 2H), 4.33 (q,  $J = 7.1$  Hz, 2H), 2.63-2.54 (m, 4H), 2.20 (s, 3H), 1.36 (t,  $J = 7.1$  Hz, 3H).

$^{13}\text{C}$  NMR (125 MHz,  $\text{CDCl}_3$ ):  $\delta$  (ppm) = 196.8, 166.5, 151.6, 145.3, 144.9, 144.5, 138.4, 138.1, 136.1, 132.7, 131.3, 130.8, 129.7, 128.7, 128.5, 126.8, 121.1, 118.4, 117.7, 112.7, 60.4, 49.2, 23.4,

22.8, 14.4, 10.0. HRMS (ESI): calcd. for  $C_{32}H_{28}Cl_2NO_4$   $[M+H]^+$  560.1390, Found: 560.1384.  $R_f$  Value: 0.46 (PE/EA – 5:1).

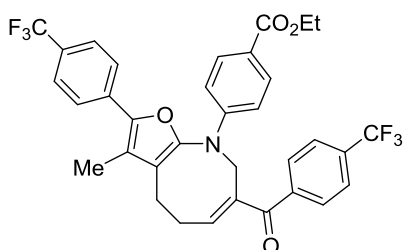

**(3f)**: 71.9 mg, 50% yield, white solid: m.p. 78-79 °C.  $^1H$  NMR (500 MHz,  $CDCl_3$ ):  $\delta$  (ppm) = 7.96 (d,  $J$  = 8.8 Hz, 2H), 7.69 (m, 8H), 6.76 (d,  $J$  = 8.8 Hz, 2H), 6.69 (t,  $J$  = 8.0 Hz, 1H), 4.81 (s, 2H), 4.34 (q,  $J$  = 7.1 Hz, 2H), 2.65-2.62 (m, 4H), 2.27 (s, 3H),

1.37 (t,  $J$  = 7.1 Hz, 3H).  $^{13}C$  NMR (125 MHz,  $CDCl_3$ ):  $\delta$  (ppm) = 196.8, 166.4, 151.4, 147.0, 145.6, 144.1, 141.2, 138.2, 134.5, 133.3 (q,  $J$  = 32.6 Hz), 131.4, 129.5, 128.5 (q,  $J$  = 32.3 Hz), 125.5 (q,  $J$  = 3.8 Hz), 125.4, 125.2 (q,  $J$  = 3.6 Hz), 124.1 (q,  $J$  = 270.2 Hz), 123.6 (q,  $J$  = 271.1 Hz), 121.3, 119.3, 118.6, 112.8, 60.4, 48.9, 23.5, 22.6, 14.3, 10.1. HRMS (ESI): calcd. for  $C_{34}H_{28}F_6NO_4$   $[M+H]^+$  628.1917, Found: 628.1925.  $R_f$  Value: 0.48 (PE/EA – 5:1).

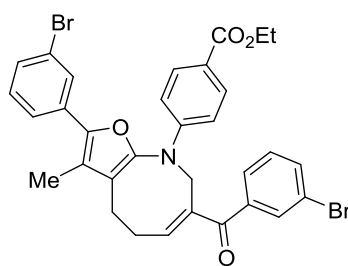

**(3g)**: 90.4 mg, 63% yield, yellow oil.  $^1H$  NMR (500 MHz,  $CDCl_3$ ):  $\delta$  (ppm) = 7.96-7.93 (m, 2H), 7.75 (t,  $J$  = 1.7 Hz, 1H), 7.66 (t,  $J$  = 1.7 Hz, 1H), 7.64-7.62 (m, 1H), 7.54-7.50 (m, 2H), 7.39-7.37 (m, 1H), 7.30-7.24 (m, 2H), 6.75-6.72 (m, 2H), 6.64 (t,  $J$  = 8.3 Hz, 1H), 4.74 (s,

2H), 4.33 (q,  $J$  = 7.1 Hz, 2H), 2.64-2.57 (m, 4H), 2.23 (s, 3H), 1.36 (t,  $J$  = 7.1 Hz, 3H).  $^{13}C$  NMR (125 MHz,  $CDCl_3$ ):  $\delta$  (ppm) = 196.2, 166.4, 151.4, 146.2, 144.9, 144.0, 139.7, 137.9, 134.7, 133.1, 132.2, 131.3, 129.9, 129.7, 128.3, 127.8, 123.9, 122.6, 122.3, 121.1, 118.4, 118.3, 112.7, 60.3, 48.8, 23.5, 22.5, 14.3, 10.0. HRMS (ESI): calcd. for  $C_{32}H_{28}Br_2NO_4$   $[M+H]^+$  648.0380, Found: 648.0380.  $R_f$  Value: 0.47 (PE/EA – 5:1).

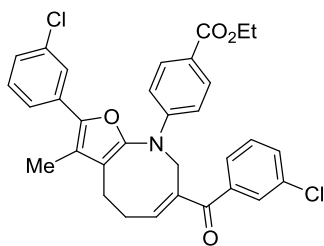

**(3h)**: 79.2 mg, 55% yield, yellow oil.  $^1\text{H}$  NMR (500 MHz,  $\text{CDCl}_3$ ):  $\delta$  (ppm) = 7.96-7.93 (m, 2H), 7.59 (t,  $J$  = 1.8 Hz, 1H), 7.51 (t,  $J$  = 1.7 Hz, 1H), 7.49-7.45 (m, 3H), 7.35-7.29 (m, 2H), 7.22-7.20 (m, 1H), 6.76-6.73 (m, 2H), 6.64 (t,  $J$  = 8.3 Hz, 1H), 4.74 (s, 2H), 4.32 (q,  $J$  = 7.1

Hz, 2H), 2.64-2.56 (m, 4H), 2.22 (s, 3H), 1.36 (t,  $J$  = 7.1 Hz, 3H).  $^{13}\text{C}$  NMR (125 MHz,  $\text{CDCl}_3$ ):  $\delta$  (ppm) = 196.4, 166.4, 151.4, 146.2, 144.9, 144.1, 139.5, 137.9, 134.4, 134.3, 132.8, 131.8, 131.3, 129.7, 129.5, 129.3, 127.3, 126.8, 125.3, 123.5, 121.1, 118.5, 118.3, 112.7, 60.3, 48.8, 23.5, 22.5, 14.3, 10.0. HRMS (ESI): calcd. for  $\text{C}_{32}\text{H}_{28}\text{Cl}_2\text{NO}_4$   $[\text{M}+\text{H}]^+$  560.1390, Found: 560.1379.  $R_f$  Value: 0.35 (PE/EA – 5:1).

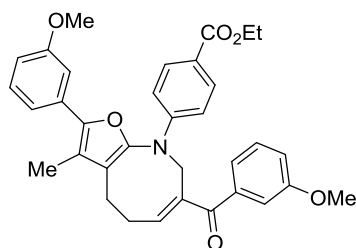

**(3i)**: 85.6 mg, 60% yield, yellow oil.  $^1\text{H}$  NMR (500 MHz,  $\text{CDCl}_3$ ):  $\delta$  (ppm) = 7.95 (d,  $J$  = 9.0 Hz, 2H), 7.31 (td,  $J$  = 7.9, 2.9 Hz, 2H), 7.21 (d,  $J$  = 7.9 Hz, 1H), 7.16-7.14 (m, 3H), 7.06-7.04 (m, 1H), 6.82 (dd,  $J$  = 8.0, 2.2 Hz, 1H), 6.76 (d,  $J$  = 9.0 Hz, 2H), 6.67 (t,  $J$  = 8.4 Hz, 1H),

4.77 (s, 2H), 4.33 (q,  $J$  = 7.1 Hz, 2H), 3.83 (s, 3H), 3.80 (s, 3H), 2.63-2.54 (m, 4H), 2.22 (s, 3H), 1.36 (t,  $J$  = 7.1 Hz, 3H).  $^{13}\text{C}$  NMR (125 MHz,  $\text{CDCl}_3$ ):  $\delta$  (ppm) = 197.7, 166.4, 159.6, 159.3, 151.7, 145.3, 145.2, 144.6, 139.2, 138.0, 132.5, 131.2, 129.5, 129.1, 121.9, 120.8, 118.3, 118.1, 118.0, 117.4, 114.0, 112.7, 111.0, 60.3, 55.3, 55.2, 49.1, 23.3, 22.7, 14.3, 10.0. HRMS (ESI): calcd. for  $\text{C}_{34}\text{H}_{34}\text{NO}_6$   $[\text{M}+\text{H}]^+$  552.2381, Found: 552.2394.  $R_f$  Value: 0.21 (PE/EA – 5:1).

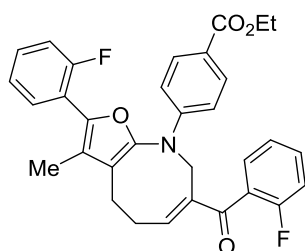

**(3j)**: 70.2 mg, 53% yield, yellow oil.  $^1\text{H}$  NMR (500 MHz,  $\text{CDCl}_3$ ):  $\delta$  (ppm) = 7.96-7.93 (m, 2H), 7.50 (td,  $J$  = 7.5, 1.8 Hz, 1H), 7.47-7.43 (m,

1H), 7.37 (td,  $J = 7.5, 1.8$  Hz, 1H), 7.33-7.29 (m, 1H), 7.21-7.17 (m, 2H), 7.16-7.08 (m, 2H), 6.76-6.72 (m, 3H), 4.79 (s, 2H), 4.33 (q,  $J = 7.1$  Hz, 2H), 2.61-2.52 (m, 4H), 2.03 (d,  $J = 2.9$  Hz, 3H), 1.36 (t,  $J = 7.1$  Hz, 3H).  $^{13}\text{C}$  NMR (125 MHz,  $\text{CDCl}_3$ ):  $\delta$  (ppm) = 195.1, 166.5, 160.4, 159.9, 158.4, 158.0, 147.8, 145.9, 140.7, 139.3, 132.5, 132.4, 131.3, 130.2, 130.1, 130.0, 129.5, 129.4, 127.2, 127.1, 124.2, 124.1, 124.0, 120.9, 119.9, 119.2, 119.0, 117.8, 116.1, 116.0, 112.7, 60.3, 48.6, 23.3, 22.7, 9.6, 9.5. HRMS (ESI): calcd. for  $\text{C}_{32}\text{H}_{28}\text{F}_2\text{NO}_4$   $[\text{M}+\text{H}]^+$  528.1981, Found: 528.1988.  $R_f$  Value: 0.34 (PE/EA – 5:1).

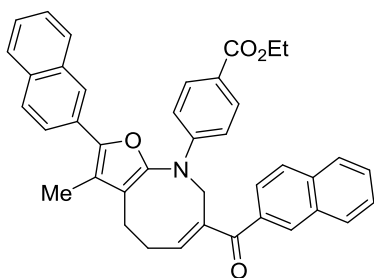

**(3k)**: 55.3 mg, 33% yield, white solid: m.p. 92-93 °C.  $^1\text{H}$  NMR (500 MHz,  $\text{CDCl}_3$ ):  $\delta$  (ppm) = 8.08 (d,  $J = 4.8$  Hz, 2H), 8.01-7.98 (m, 2H), 7.88-7.85 (m, 5H), 7.84-7.80 (m, 2H), 7.75 (dd,  $J = 8.5, 1.6$  Hz, 1H), 7.59-7.55 (m, 1H), 7.52-7.45 (m, 3H), 6.86-6.83 (m, 2H), 6.73 (t,  $J = 8.5$ , 1H), 4.87 (s, 2H), 4.35 (q,  $J = 7.1$  Hz, 2H), 2.70-2.60 (m, 4H), 2.36 (s, 3H), 1.38 (t,  $J = 7.1$  Hz, 3H).  $^{13}\text{C}$  NMR (125 MHz,  $\text{CDCl}_3$ ):  $\delta$  (ppm) = 198.1, 166.5, 151.8, 145.7, 145.0, 144.9, 138.4, 135.1, 135.0, 133.3, 132.2, 132.1, 131.3, 130.8, 129.2, 128.8, 128.2, 128.1, 127.7, 127.6, 126.7, 126.3, 125.9, 125.4, 124.3, 123.8, 120.9, 118.6, 117.7, 112.8, 60.4, 49.3, 23.5, 22.8, 14.4, 10.2. HRMS (ESI): calcd. for  $\text{C}_{40}\text{H}_{34}\text{NO}_4$   $[\text{M}+\text{H}]^+$  592.2482, Found: 592.2471.  $R_f$  Value: 0.28 (PE/EA – 5:1).

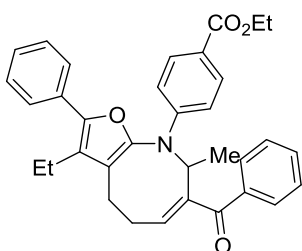

**(3l)**: 63.4 mg, 46% yield, white solid: m.p. 66-67 °C.  $^1\text{H}$  NMR (500 MHz,  $\text{CDCl}_3$ ):  $\delta$  (ppm) = 7.95 (d,  $J = 8.9$  Hz, 2H), 7.74-7.73 (m, 2H), 7.67-7.65 (m, 2H), 7.57-7.54 (m, 1H), 7.47-7.42 (m, 4H), 7.30 (t,  $J = 7.4$  Hz, 1H),

6.82 (d,  $J = 9.0$  Hz, 2H), 6.45-6.41 (m, 1H), 5.52 (q,  $J = 6.8$ , 1H), 4.33 (q,  $J = 7.1$  Hz, 2H), 2.84-2.79 (m, 1H), 2.75-2.67 (m, 2H), 2.58-2.52 (m, 1H), 2.43-2.36 (m, 1H), 2.33-2.27 (m, 1H), 1.36 (t,  $J = 7.1$  Hz, 3H), 1.32 (t,  $J = 7.5$  Hz, 3H), 1.26 (d,  $J = 6.9$  Hz, 3H).  $^{13}\text{C}$  NMR (125 MHz,  $\text{CDCl}_3$ ):  $\delta$  (ppm) = 199.1, 166.6, 151.9, 145.3, 144.2, 143.4, 140.2, 138.1, 132.4, 131.4, 131.3, 129.6, 128.6, 128.3, 127.1, 125.6, 123.6, 120.9, 119.3, 112.5, 60.3, 54.4, 23.7, 22.3, 19.9, 17.9, 14.5, 14.4. HRMS (ESI): calcd. for  $\text{C}_{34}\text{H}_{34}\text{NO}_4$   $[\text{M}+\text{H}]^+$  520.2482, Found: 520.2475.  $R_f$  Value: 0.46 (PE/EA – 5:1).

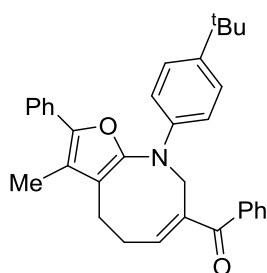

**(3m)**: 72.9 mg, 65% yield, white solid: m.p. 83-84 °C.  $^1\text{H}$  NMR (500 MHz,  $\text{CDCl}_3$ ):  $\delta$  (ppm) = 7.70 (d,  $J = 8.2$  Hz, 2H), 7.66 (dd,  $J = 7.0$ , 1.2 Hz, 2H), 7.57-7.54 (m, 1H), 7.45 (t,  $J = 7.8$  Hz, 4H), 7.35-7.29 (m, 3H), 6.81 (dd,  $J = 8.7$ , 1.7 Hz, 2H), 6.71-6.68 (m, 1H), 4.80 (s, 2H), 2.70 (s, 4H), 1.37 (s, 9H).

$^{13}\text{C}$  NMR (125 MHz,  $\text{CDCl}_3$ ):  $\delta$  (ppm) = 198.4, 146.0, 145.4, 145.2, 144.7, 141.5, 139.0, 138.1, 131.7, 131.6, 129.3, 128.4, 128.0, 126.5, 125.9, 125.5, 117.7, 117.0, 113.2, 48.9, 33.8, 31.4, 23.9, 22.7, 10.0. HRMS (ESI): calcd. for  $\text{C}_{33}\text{H}_{34}\text{NO}_2$   $[\text{M}+\text{H}]^+$  476.2584, Found: 476.2580.  $R_f$  Value: 0.50 (PE/EA – 6:1).

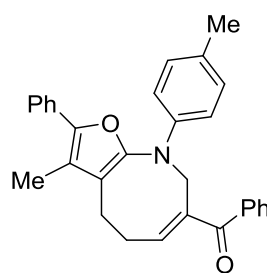

**(3n)**: 62.9 mg, 58% yield, yellow oil.  $^1\text{H}$  NMR (500 MHz,  $\text{CDCl}_3$ ):  $\delta$  (ppm) = 7.66-7.61 (m, 4H), 7.54-7.51 (m, 1H), 7.42 (td,  $J = 7.8$ , 3.1 Hz, 4H), 7.28-7.25 (m, 1H), 7.09-7.07 (m, 2H), 6.73-6.72 (m, 2H), 6.66-6.65 (m, 1H), 4.75 (s, 2H), 2.65 (d,  $J = 4.0$  Hz, 4H), 2.30 (s, 3H), 2.25 (s, 3H).  $^{13}\text{C}$  NMR

(125 MHz,  $\text{CDCl}_3$ ):  $\delta$  (ppm) = 198.5, 146.2, 145.6, 145.2, 144.7, 139.0, 138.2, 131.8, 131.6, 129.7,



129.4, 128.4, 128.1, 128.0, 126.6, 125.5, 117.6, 117.1, 113.6, 49.1, 23.8, 22.8, 20.3, 10.0. HRMS (ESI): calcd. for C<sub>30</sub>H<sub>28</sub>NO<sub>2</sub> [M+H]<sup>+</sup> 434.2115, Found: 434.2102. R<sub>f</sub> Value: 0.50 (PE/EA – 5:1).

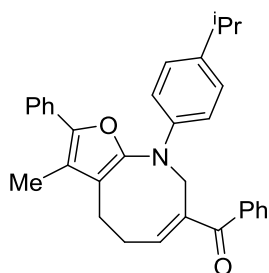

**(3o)**: 54.6 mg, 43% yield, white solid: m.p. 59-60 °C. <sup>1</sup>H NMR (500 MHz, CDCl<sub>3</sub>): δ (ppm) = 7.63 (dd, *J* = 20.5, 7.4 Hz, 4H), 7.52 (t, *J* = 7.4 Hz, 1H), 7.41 (t, *J* = 7.8 Hz, 4H), 7.26 (t, *J* = 7.4 Hz, 1H), 7.13 (d, *J* = 8.6 Hz, 2H), 6.75 (d, *J* = 8.6 Hz, 2H), 6.66-6.64 (m, 1H), 4.74 (s, 2H), 2.91-2.83 (m, 1H),

2.65 (s, 4H), 2.25 (s, 3H), 1.25 (d, *J* = 6.9, 6H). <sup>13</sup>C NMR (125 MHz, CDCl<sub>3</sub>): δ (ppm) = 198.4, 146.1, 145.8, 145.2, 144.7, 139.3, 139.0, 138.2, 131.7, 131.6, 129.4, 128.4, 128.0, 127.0, 126.6, 125.5, 117.7, 117.0, 113.6, 49.0, 33.0, 24.1, 23.9, 22.8, 10.0. HRMS (ESI): calcd. for C<sub>32</sub>H<sub>32</sub>NO<sub>2</sub> [M+H]<sup>+</sup> 462.2428, Found: 462.2422. R<sub>f</sub> Value: 0.48 (PE/EA – 10:1).

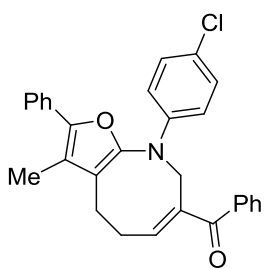

**(3p)**: 75.3 mg, 66% yield, white solid: m.p. 73-74 °C. <sup>1</sup>H NMR (500 MHz, CDCl<sub>3</sub>): δ (ppm) = 7.64-7.60 (m, 4H), 7.52 (t, *J* = 7.4 Hz, 1H), 7.41 (td, *J* = 7.7, 3.0 Hz, 4H), 7.27 (t, *J* = 7.5 Hz, 1H), 7.21-7.18 (m, 2H), 6.72-6.70 (m, 2H), 6.66 (t, *J* = 8.0 Hz, 1H), 4.71 (s, 2H), 2.65-2.58 (m, 4H), 2.23 (s, 3H).

<sup>13</sup>C NMR (125 MHz, CDCl<sub>3</sub>): δ (ppm) = 198.3, 146.6, 145.4, 145.3, 145.1, 138.5, 138.0, 131.9, 131.4, 129.4, 129.1, 128.5, 128.2, 126.8, 125.6, 123.9, 118.0, 117.1, 114.8, 49.3, 23.7, 22.8, 10.0. HRMS (ESI): calcd. for C<sub>29</sub>H<sub>25</sub>ClNO<sub>2</sub> [M+H]<sup>+</sup> 454.1568, Found: 454.1565. R<sub>f</sub> Value: 0.46 (PE/EA – 5:1).

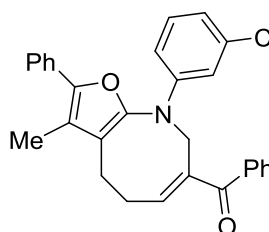

**(3q)**: 68.3 mg, 53% yield, white solid: m.p. 61-62 °C. <sup>1</sup>H NMR (500 MHz,

CDCl<sub>3</sub>):  $\delta$  (ppm) = 7.65-7.61 (m, 4H), 7.54-7.51 (m, 1H), 7.44-7.40 (m, 4H), 7.30-7.26 (m, 1H), 7.16 (t,  $J$  = 8.1 Hz, 1H), 6.83 (dd,  $J$  = 7.8, 1.2 Hz, 1H), 6.78 (t,  $J$  = 2.1 Hz, 1H), 6.68-6.65 (m, 2H), 4.72 (s, 2H), 2.65-2.59 (m, 4H), 2.24 (s, 3H). <sup>13</sup>C NMR (125 MHz, CDCl<sub>3</sub>):  $\delta$  (ppm) = 198.2, 149.2, 145.3, 145.2, 144.9, 138.4, 138.0, 135.1, 131.9, 131.4, 130.2, 129.4, 128.5, 128.1, 126.8, 125.6, 119.0, 118.2, 117.1, 113.6, 111.7, 49.3, 23.5, 22.8, 10.0. HRMS (ESI): calcd. for C<sub>29</sub>H<sub>25</sub>ClNO<sub>2</sub> [M+H]<sup>+</sup> 454.1568, Found: 454.1575. R<sub>f</sub> Value: 0.43 (PE/EA – 5:1).

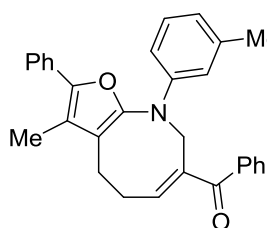

**(3r)**: 68.9 mg, 60% yield, white solid: m.p. 56-57°C. <sup>1</sup>H NMR (500 MHz, CDCl<sub>3</sub>):  $\delta$  (ppm) = 7.65 (dd,  $J$  = 18.5, 7.8 Hz, 4H), 7.53 (t,  $J$  = 7.3 Hz, 1H), 7.43 (t,  $J$  = 7.6 Hz, 4H), 7.28 (t,  $J$  = 7.4, 1H), 7.17 (t,  $J$  = 7.7 Hz, 1H), 6.70

(t,  $J$  = 7.3 Hz, 1H), 6.64 (t,  $J$  = 12.3 Hz, 3H), 4.76 (s, 2H), 2.65 (d,  $J$  = 3.4 Hz, 4H), 2.33 (s, 3H), 2.26 (s, 3H). <sup>13</sup>C NMR (125 MHz, CDCl<sub>3</sub>):  $\delta$  (ppm) = 198.5, 148.0, 146.0, 145.1, 144.9, 139.0, 138.9, 138.2, 131.8, 131.6, 129.4, 129.0, 128.4, 128.1, 126.6, 125.5, 119.9, 117.8, 117.1, 114.2, 110.8, 49.1, 23.6, 22.9, 21.8, 10.1. HRMS (ESI): calcd. for C<sub>30</sub>H<sub>28</sub>NO<sub>2</sub> [M+H]<sup>+</sup> 434.2115, Found: 434.2121. R<sub>f</sub> Value: 0.45 (PE/EA – 5:1).

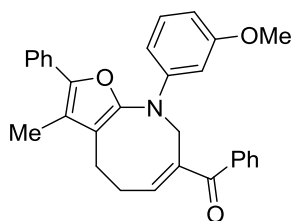

**(3s)**: 79.6 mg, 70% yield, yellow oil. <sup>1</sup>H NMR (500 MHz, CDCl<sub>3</sub>):  $\delta$  (ppm) = 7.68-7.64 (m, 4H), 7.55-7.51 (m, 1H), 7.43 (td,  $J$  = 7.8, 2.9 Hz, 4H), 7.28 (t,  $J$  = 7.4 Hz, 1H), 7.19 (t,  $J$  = 8.2 Hz, 1H), 6.67 (t,  $J$  = 4.0 Hz, 1H),

6.46-6.43 (m, 2H), 6.40 (t,  $J$  = 2.3 Hz, 1H), 4.78 (s, 2H), 3.79 (s, 3H), 2.65 (d,  $J$  = 4.1 Hz, 4H), 2.25 (s, 3H). <sup>13</sup>C NMR (125 MHz, CDCl<sub>3</sub>):  $\delta$  (ppm) = 198.3, 160.0, 149.3, 145.6, 145.1, 144.9, 138.7, 138.0, 131.7, 131.5, 129.9, 129.3, 128.3, 128.0, 126.6, 125.5, 117.9, 117.0, 106.4, 103.7, 100.2,

55.0, 49.2, 23.4, 22.8, 9.9. HRMS (ESI): calcd. for  $C_{30}H_{28}NO_3$   $[M+H]^+$  450.2064, Found: 450.2059.

$R_f$  Value: 0.46 (PE/EA – 5:1).

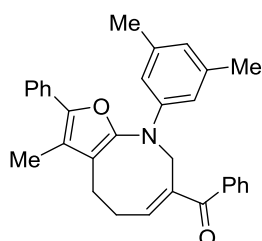

**(3t)**: 77.2 mg, 67% yield, white solid: m.p. 70-71 °C.  $^1H$  NMR (500 MHz,  $CDCl_3$ ):  $\delta$  (ppm) = 7.67 (d,  $J$  = 7.6 Hz, 2H), 7.63 (d,  $J$  = 7.1 Hz, 2H), 7.54-7.51 (m, 1H), 7.42 (t,  $J$  = 7.7 Hz, 4H), 7.28 (t,  $J$  = 7.4 Hz, 1H), 6.67-6.66 (m, 1H), 6.54 (s, 1H), 6.44 (s, 2H), 4.74 (s, 2H), 2.66-2.65 (m, 4H),

2.29 (s, 6H), 2.27 (s, 3H).  $^{13}C$  NMR (125 MHz,  $CDCl_3$ ):  $\delta$  (ppm) = 198.5, 148.0, 146.0, 145.1, 144.8, 139.0, 138.8, 138.2, 131.7, 131.6, 129.4, 128.4, 128.1, 126.6, 125.6, 121.0, 117.8, 117.1, 111.5, 49.2, 23.7, 22.9, 21.6, 10.1. HRMS (ESI): calcd. for  $C_{31}H_{30}NO_2$   $[M+H]^+$  448.2271, Found: 448.2261.  $R_f$  Value: 0.49 (PE/EA – 7:1).

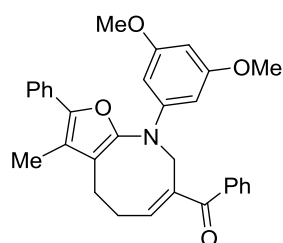

**(3u)**: 78.2 mg, 68% yield, yellow oil.  $^1H$  NMR (500 MHz,  $CDCl_3$ ):  $\delta$  (ppm) = 7.64-7.59 (m, 4H), 7.53 (m, 1H), 7.40 (td,  $J$  = 7.8, 3.2 Hz, 4H), 7.27-7.24 (m, 1H), 6.66-6.63 (m, 1H), 6.03-6.02 (m, 1H), 5.97 (q,  $J$  = 1.0 Hz, 2H), 4.72 (s, 2H), 3.74 (s, 6H), 2.63-2.62 (m, 4H), 2.21 (s, 3H).  $^{13}C$  NMR (125

MHz,  $CDCl_3$ ):  $\delta$  (ppm) = 198.4, 161.6, 150.1, 145.6, 145.2, 145.0, 138.8, 138.1, 131.8, 131.6, 129.4, 128.4, 128.1, 126.7, 125.6, 118.0, 117.1, 92.9, 90.8, 55.2, 49.4, 23.5, 22.9, 10.0. HRMS (ESI): calcd. for  $C_{31}H_{30}NO_4$   $[M+H]^+$  480.2169, Found: 480.2169.  $R_f$  Value: 0.30 (PE/EA – 5:1).

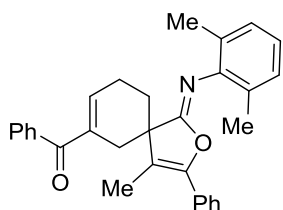

**(4a)**: 65.8 mg, 54% yield, white solid: m.p. 62-63 °C.  $^1H$  NMR (500 MHz,  $CDCl_3$ ):  $\delta$  (ppm) = 7.77-7.75 (m, 2H), 7.55-7.52 (m, 1H), 7.47-7.44 (m, 4H),

7.39-7.36 (m, 2H), 7.34-7.31 (m, 1H), 7.06 (d,  $J = 7.5$  Hz, 2H), 6.93 (t,  $J = 7.5$  Hz, 1H), 6.81-6.79 (m, 1H), 3.26-3.18 (m, 1H), 2.91 (s, 2H), 2.59-2.52 (m, 1H), 2.18 (s, 6H), 2.10-2.07 (m, 2H), 2.03 (s, 3H).  $^{13}\text{C}$  NMR (125 MHz,  $\text{CDCl}_3$ ):  $\delta$  (ppm) = 197.6, 163.4, 145.7, 145.0, 143.4, 138.4, 135.1, 131.5, 129.7, 129.2, 128.4, 128.2, 128.0, 127.5, 127.4, 127.0, 122.5, 116.2, 48.1, 30.9, 28.5, 22.9, 18.1, 9.2. HRMS (ESI): calcd. for  $\text{C}_{31}\text{H}_{30}\text{NO}_2$   $[\text{M}+\text{H}]^+$  448.2271, Found: 448.2269.  $R_f$  Value: 0.50 (PE/EA – 6:1).

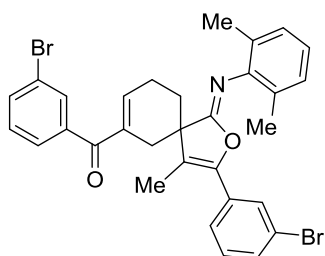

**(4b)**: 73.3 mg, 50% yield, yellow oil.  $^1\text{H}$  NMR (500 MHz,  $\text{CDCl}_3$ ):  $\delta$  (ppm) = 7.84 (t,  $J = 1.7$  Hz, 1H), 7.65-7.61 (m, 2H), 7.56 (t,  $J = 1.7$  Hz, 1H), 7.44-7.43 (m, 1H), 7.34 (d,  $J = 7.9$  Hz, 1H), 7.30 (t,  $J = 7.8$  Hz, 1H), 7.21 (t,  $J = 7.9$  Hz, 1H), 7.03 (d,  $J = 7.6$  Hz, 2H), 6.91 (t,  $J = 15.0$ , 1H), 6.78-6.77 (m, 1H), 3.23-3.15 (m, 1H), 2.89-2.79 (m, 2H), 2.58-2.53 (m, 1H), 2.12 (s, 6H), 2.07-2.04 (m, 2H), 1.99 (s, 3H).  $^{13}\text{C}$  NMR (125 MHz,  $\text{CDCl}_3$ ):  $\delta$  (ppm) = 195.7, 162.7, 144.6, 144.5, 144.2, 140.3, 134.8, 134.4, 131.9, 131.6, 131.5, 129.8, 129.6, 127.8, 127.6, 127.3, 125.7, 122.7, 122.4, 122.3, 117.5, 48.1, 30.7, 28.4, 23.0, 18.1, 9.2. HRMS (ESI): calcd. for  $\text{C}_{31}\text{H}_{28}\text{Br}_2\text{NO}_2$   $[\text{M}+\text{H}]^+$  604.0481, Found: 604.0476.  $R_f$  Value: 0.48 (PE/EA – 5:1).

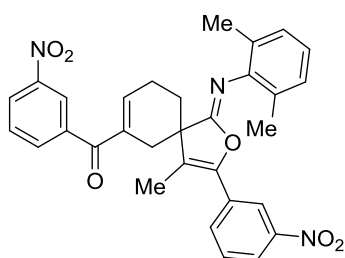

**(4c)**: 87.5 mg, 62% yield, white solid: m.p. 80-81 °C.  $^1\text{H}$  NMR (500 MHz,  $\text{CDCl}_3$ ):  $\delta$  (ppm) = 8.53 (s, 1H), 8.36 (d,  $J = 7.1$  Hz, 1H), 8.29 (s, 1H), 8.15 (d,  $J = 7.5$  Hz, 1H), 8.01 (d,  $J = 6.6$  Hz, 1H), 7.70 (d,  $J = 7.2$  Hz, 1H), 7.63 (t,  $J = 7.3$  Hz, 1H), 7.53 (t,  $J = 7.6$  Hz, 1H), 7.03 (d,  $J = 7.3$  Hz, 2H), 6.91 (t,  $J = 7.2$  Hz, 1H), 6.80 (s, 1H), 3.23 (d,  $J = 18.8$  Hz, 1H), 2.96 (d,  $J = 17.7$  Hz,

1H), 2.84 (d,  $J = 17.8$  Hz, 1H), 2.61 (d,  $J = 19.8$  Hz, 1H), 2.12-2.07 (m, 11H).  $^{13}\text{C}$  NMR (125 MHz,  $\text{CDCl}_3$ ):  $\delta$  (ppm) = 194.7, 162.1, 148.1, 148.0, 145.2, 144.3, 143.9, 139.8, 134.8, 134.6, 132.7, 131.2, 129.6, 129.4, 127.6, 127.2, 125.9, 123.9, 123.1, 123.0, 121.8, 118.9, 48.2, 30.5, 28.2, 23.1, 18.1, 9.3. HRMS (ESI): calcd. for  $\text{C}_{31}\text{H}_{28}\text{N}_3\text{O}_6$   $[\text{M}+\text{H}]^+$  538.1973, Found: 538.1976.  $R_f$  Value: 0.50 (PE/EA – 2:1).

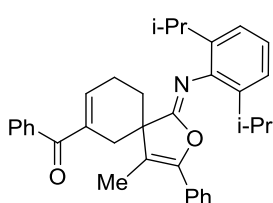

**(4d)**: 66.9 mg, 51% yield, colorless oil.  $^1\text{H}$  NMR (500 MHz,  $\text{CDCl}_3$ ):  $\delta$  (ppm) = 7.74-7.72 (m, 2H), 7.54-7.51 (m, 1H), 7.46-7.43 (m, 4H), 7.37-7.29 (m, 3H), 7.15 (s, 2H), 7.11-7.08 (m, 1H), 6.83-6.81 (m, 1H), 3.26-3.18 (m,

1H), 3.03-2.95 (m, 2H), 2.91 (d,  $J = 0.9$  Hz, 2H), 2.59-2.53 (m, 1H), 2.11-2.08 (m, 2H), 2.02 (s, 3H), 1.27-1.15 (m, 12H).  $^{13}\text{C}$  NMR (125 MHz,  $\text{CDCl}_3$ ):  $\delta$  (ppm) = 195.8, 163.6, 144.6, 144.0, 143.8, 140.0, 134.8, 134.4, 134.3, 131.6, 131.2, 130.2, 129.7, 129.6, 129.5, 129.1, 128.8, 127.4, 127.0, 125.2, 117.7, 115.3, 48.3, 30.7, 28.4, 23.0, 17.9, 9.3. HRMS (ESI): calcd. for  $\text{C}_{35}\text{H}_{38}\text{NO}_2$   $[\text{M}+\text{H}]^+$  504.2897, Found: 504.2899.  $R_f$  Value: 0.49 (PE/EA – 6:1).

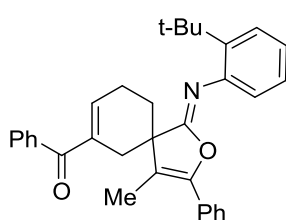

**(4e)**: 47.2 mg, 32% yield, white solid: m.p. 172-173 °C.  $^1\text{H}$  NMR (500 MHz,  $\text{CDCl}_3$ ):  $\delta$  (ppm) = 7.73-7.71 (m, 2H), 7.54-7.49 (m, 3H), 7.46-7.43 (m, 2H), 7.39-7.36 (m, 3H), 7.34-7.31 (m, 1H), 7.19-7.16 (m, 1H), 7.07-7.04 (m, 1H), 6.96 (dd,  $J = 7.8, 1.3$  Hz, 1H), 6.85 (d,  $J = 1.5$  Hz, 1H),

3.18-3.11 (m, 1H), 2.96 (d,  $J = 18.1$  Hz, 1H), 2.83 (dd,  $J = 18.1, 1.6$  Hz, 1H), 2.54-2.49 (m, 1H), 2.07-2.05 (m, 2H), 2.03 (s, 3H), 1.39 (s, 9H).  $^{13}\text{C}$  NMR (125 MHz,  $\text{CDCl}_3$ ):  $\delta$  (ppm) = 197.3, 162.7, 145.7, 145.6, 144.1, 140.1, 138.5, 135.4, 131.3, 129.8, 129.1, 128.4, 128.3, 128.0, 127.0, 126.1,

126.0, 123.3, 123.0, 116.1, 48.5, 35.0, 29.8, 29.7, 22.8, 9.3. HRMS (ESI): calcd. for C<sub>33</sub>H<sub>34</sub>NO<sub>2</sub> [M+H]<sup>+</sup> 476.2584, Found: 476.2589. R<sub>f</sub> Value: 0.50 (PE/EA – 6:1).

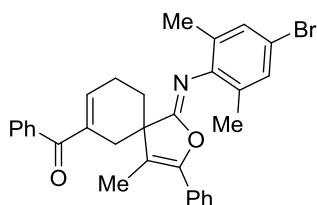

**(4f)**: 78.1 mg, 57% yield, white solid: m.p. 178-179 °C. <sup>1</sup>H NMR (500 MHz, CDCl<sub>3</sub>): δ (ppm) = 7.73-7.72 (m, 2H), 7.54-7.51 (m, 1H), 7.44 (t, *J* = 7.5 Hz, 4H), 7.38-7.35 (m, 2H), 7.33-7.30 (m, 1H), 7.17 (s, 2H), 6.78

(d, *J* = 1.4 Hz, 1H), 3.18-3.10 (m, 1H), 2.87 (s, 2H), 2.57-2.52 (m, 1H), 2.11 (s, 6H), 2.08-2.04 (m, 2H), 2.01 (s, 3H). <sup>13</sup>C NMR (125 MHz, CDCl<sub>3</sub>): δ (ppm) = 197.5, 145.6, 144.1, 143.3, 138.3, 135.0, 131.5, 130.1, 129.7, 129.5, 129.2, 128.6, 128.3, 128.1, 126.9, 116.4, 115.1, 48.3, 30.9, 28.5, 22.9, 17.9, 9.2. HRMS (ESI): calcd. for C<sub>31</sub>H<sub>29</sub>BrNO<sub>2</sub> [M+H]<sup>+</sup> 526.1376, Found: 526.1378. R<sub>f</sub> Value: 0.50 (PE/EA – 8:1).

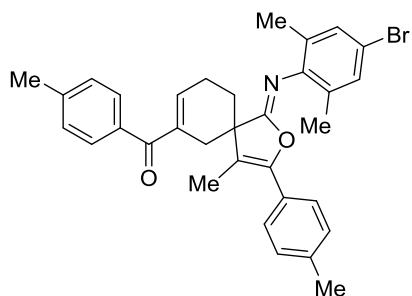

**(4g)**: 92.9 mg, 61% yield, colorless oil. <sup>1</sup>H NMR (500 MHz, CDCl<sub>3</sub>): δ (ppm) = 7.65 (d, *J* = 8.0 Hz, 2H), 7.31 (d, *J* = 8.2 Hz, 2H), 7.23 (d, *J* = 8.0 Hz, 2H), 7.18-7.15 (m, 4H), 6.73 (d, *J* = 1.2 Hz, 1H), 3.15-3.08 (m, 1H), 2.88-2.80 (m, 2H), 2.55-2.50 (m, 1H),

2.41 (s, 3H), 2.35 (s, 3H), 2.09 (s, 6H), 2.06-2.02 (m, 2H), 1.98 (s, 3H). <sup>13</sup>C NMR (125 MHz, CDCl<sub>3</sub>): δ (ppm) = 197.3, 164.5, 145.7, 144.3, 142.3, 142.2, 138.6, 135.6, 135.1, 130.1, 129.8, 129.5, 129.0, 128.8, 126.9, 126.7, 115.6, 115.1, 48.3, 31.1, 28.7, 22.9, 21.5, 21.3, 17.9, 9.2. HRMS (ESI): calcd. for C<sub>33</sub>H<sub>33</sub>BrNO<sub>2</sub> [M+H]<sup>+</sup> 554.1689, Found: 554.1679. R<sub>f</sub> Value: 0.50 (PE/EA – 8:1).

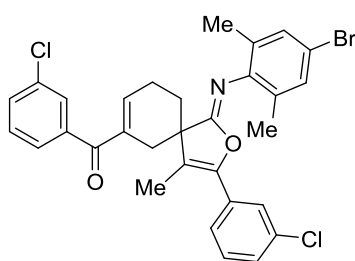

**(4h)**: 91.3 mg, 65% yield, colorless oil.  $^1\text{H}$  NMR (500 MHz,  $\text{CDCl}_3$ ):

$\delta$  (ppm) = 7.66 (t,  $J$  = 1.7 Hz, 1H), 7.55 (dt,  $J$  = 7.8, 1.3 Hz, 1H), 7.49

(dq,  $J$  = 8.0, 1.1 Hz, 1H), 7.39-7.38 (m, 1H), 7.36 (t,  $J$  = 7.8 Hz, 1H),

7.30-7.27 (m, 3H), 7.15 (s, 2H), 6.77 (d,  $J$  = 1.6 Hz, 1H), 3.17-3.09

(m, 1H), 2.87-2.77 (m, 2H), 2.57-2.53 (m, 1H), 2.07 (s, 6H), 2.05-2.01 (m, 2H), 1.98 (s, 3H).  $^{13}\text{C}$

NMR (125 MHz,  $\text{CDCl}_3$ ):  $\delta$  (ppm) = 197.5, 163.1, 145.6, 143.8, 142.6, 138.4, 135.0, 131.4, 129.7,

129.2, 128.4, 128.2, 128.0, 127.0, 123.1, 122.4, 116.2, 48.1, 30.7, 28.4, 28.3, 23.1, 9.2. HRMS

(ESI): calcd. for  $\text{C}_{31}\text{H}_{27}\text{BrCl}_2\text{NO}_2$   $[\text{M}+\text{H}]^+$  594.0597, Found: 594.0591.  $R_f$  Value: 0.47 (PE/EA –

5:1).

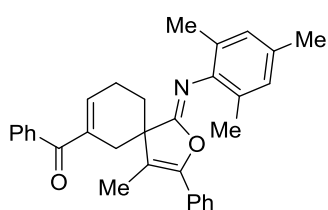

**(4i)**: 56.7 mg, 45% yield, white solid m.p. 64-65°C.  $^1\text{H}$  NMR (500 MHz,

$\text{CDCl}_3$ ):  $\delta$  (ppm) = 7.75 (d,  $J$  = 7.8 Hz, 2H), 7.53 (t,  $J$  = 7.3 Hz, 1H),

7.46-7.43 (m, 4H), 7.36 (t,  $J$  = 7.4 Hz, 2H), 7.33-7.30 (m, 1H), 6.87 (s,

2H), 6.78 (s, 1H), 3.21-3.17 (m, 1H), 2.89 (s, 2H), 2.53 (dd,  $J$  = 19.7, 4.4 Hz, 1H), 2.29 (s, 3H),

2.13 (s, 6H), 2.06-2.05 (m, 2H), 2.01 (s, 3H).  $^{13}\text{C}$  NMR (125 MHz,  $\text{CDCl}_3$ ):  $\delta$  (ppm) = 197.6, 145.7,

143.4, 142.3, 138.4, 135.1, 131.6, 131.5, 129.8, 129.3, 128.4, 128.2, 128.1, 128.0, 127.2, 127.1,

116.2, 48.1, 31.0, 28.6, 23.0, 20.7, 18.0, 9.2. HRMS (ESI): calcd. for  $\text{C}_{32}\text{H}_{32}\text{NO}_2$   $[\text{M}+\text{H}]^+$  462.2428,

Found: 462.2414.  $R_f$  Value: 0.50 (PE/EA – 8:1).

## 4 Preliminary Mechanistic Study and Control Experiment

### a) Reaction for Furan-fused eight-membered ring formation with D<sub>2</sub>O under the optimal conditions

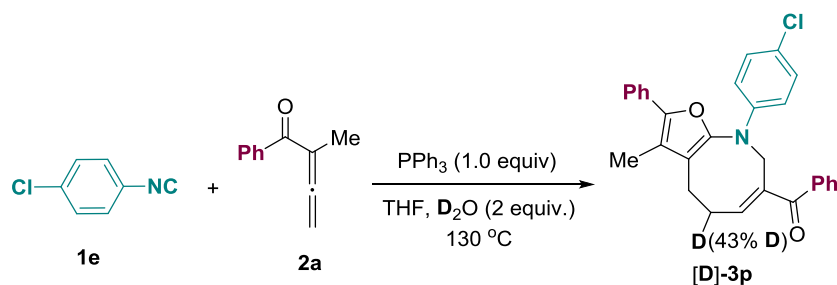

Under air atmosphere, a sealable reaction tube with a Teflon-coated screw cap equipped with a magnetic stir bar was charged with isocyanide **1e** (0.5 mmol), allenyl ketone **2a** (0.5mmol) and triphenylphosphine (1.0 equiv.) in THF (5.0 mL) at room temperature. To this mixture  $\text{D}_2\text{O}$  (2 equiv.) was added. The rubber septum was then replaced by a Teflon-coated screw cap, and the reaction vessel placed in an oil bath at  $130\text{ }^\circ\text{C}$  for 12 h. After the reaction was completed, it was cooled to room temperature and monitored by TLC. The solvent was then removed under reduced pressure and the residue was purified by column chromatography on silica gel to afford product **[D]-3p**.

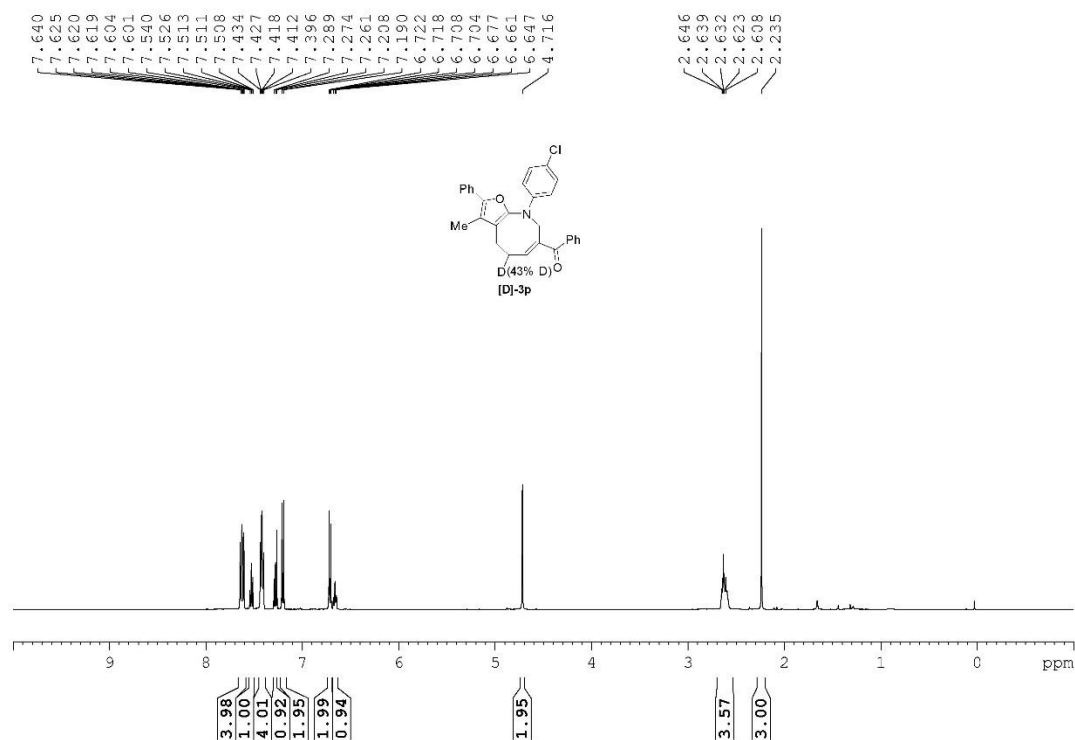



**b) Reaction for spirocycle formation with D<sub>2</sub>O under the optimal conditions**

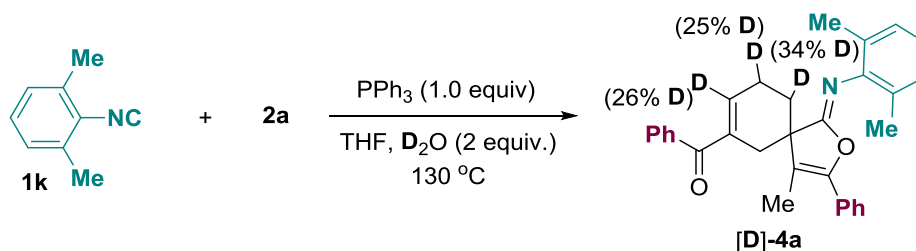

Under air atmosphere, a sealable reaction tube with a Teflon-coated screw cap equipped with a magnetic stir bar was charged with isocyanide **1k** (0.5 mmol), allenyl ketone **2a** (0.5mmol) and triphenylphosphine (1.0 equiv.) in THF (5.0 mL) at room temperature. To this mixture D<sub>2</sub>O (2 equiv.) was added. The rubber septum was then replaced by a Teflon-coated screw cap, and the reaction vessel placed in an oil bath at 130 °C for 12 h. After the reaction was completed, it was cooled to room temperature and monitored by TLC. The solvent was then removed under reduced pressure and the residue was purified by column chromatography on silica gel to afford product [D]-4a.

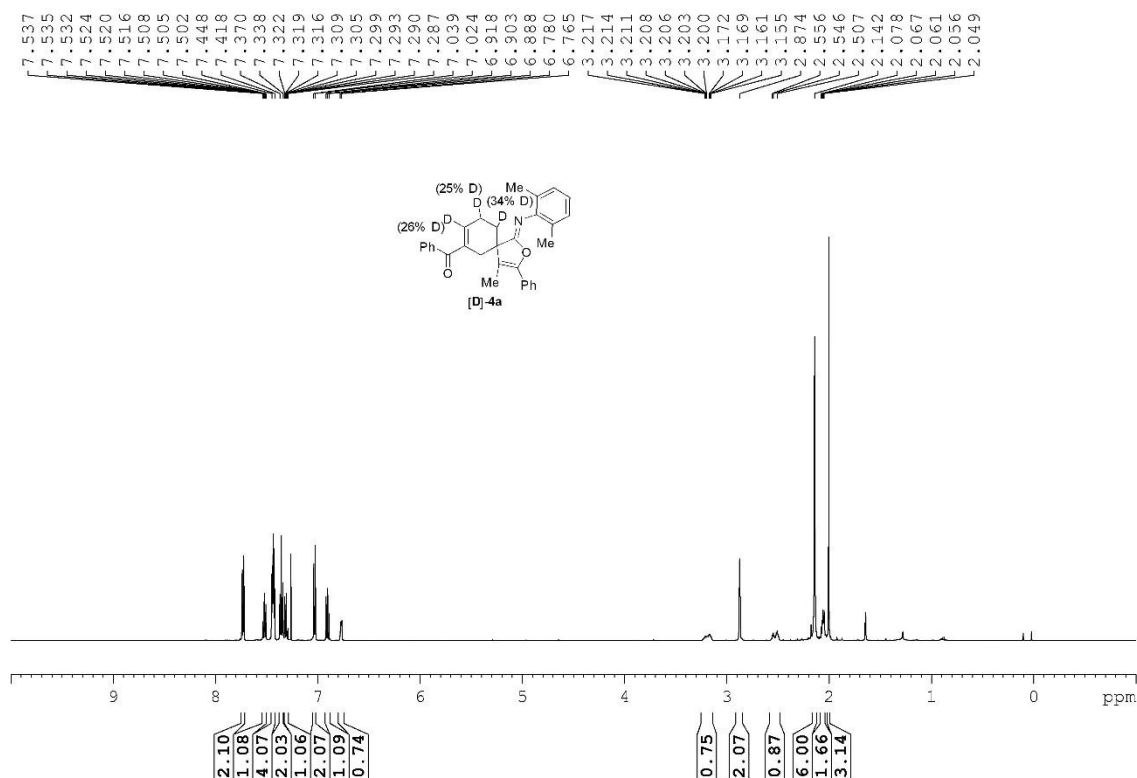

c) Reaction with chiral phosphine for spirocycle formation

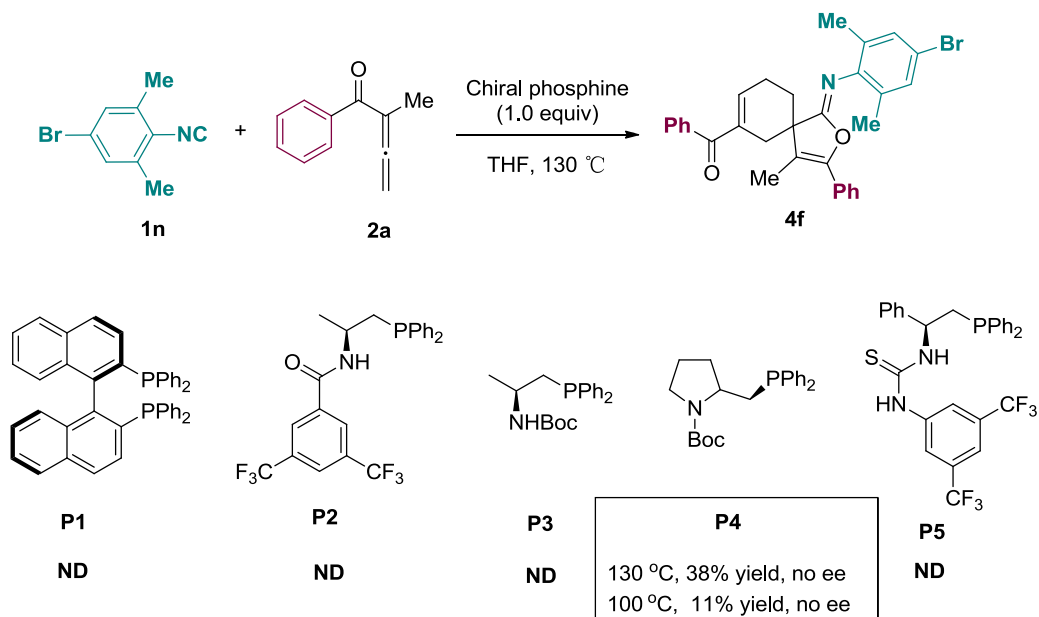

Under air atmosphere, a sealable reaction tube with a Teflon-coated screw cap equipped with a magnetic stir bar was charged with isocyanide **1n** (0.5 mmol), allenyl ketone **2a** (0.5mmol) and chiral phosphine (1.0 equiv.) in THF (5.0 mL) at room temperature. The rubber septum was then replaced by a Teflon-coated screw cap, and the reaction vessel placed in an oil bath at 130 °C for 12 h. After the reaction was completed, it was cooled to room temperature and monitored by TLC. The solvent was then removed under reduced pressure and the residue was purified by column chromatography on silica gel to afford product.

# 5 <sup>1</sup>H NMR and <sup>13</sup>C NMR Spectra of All Compounds

## Compound 3a

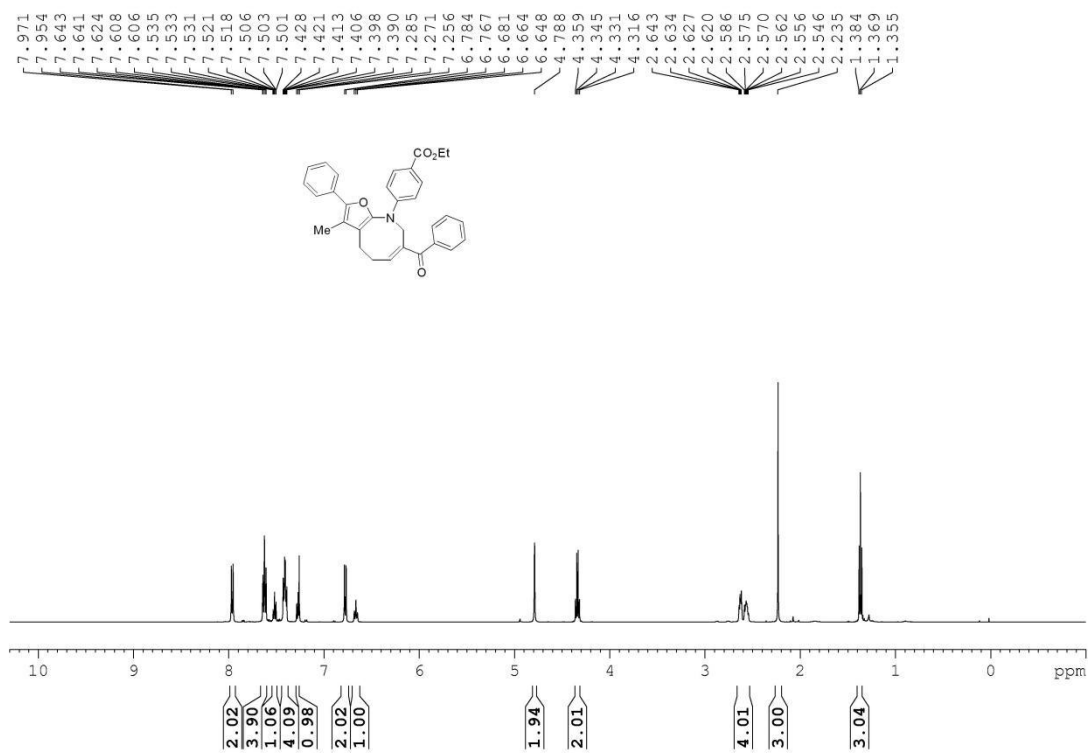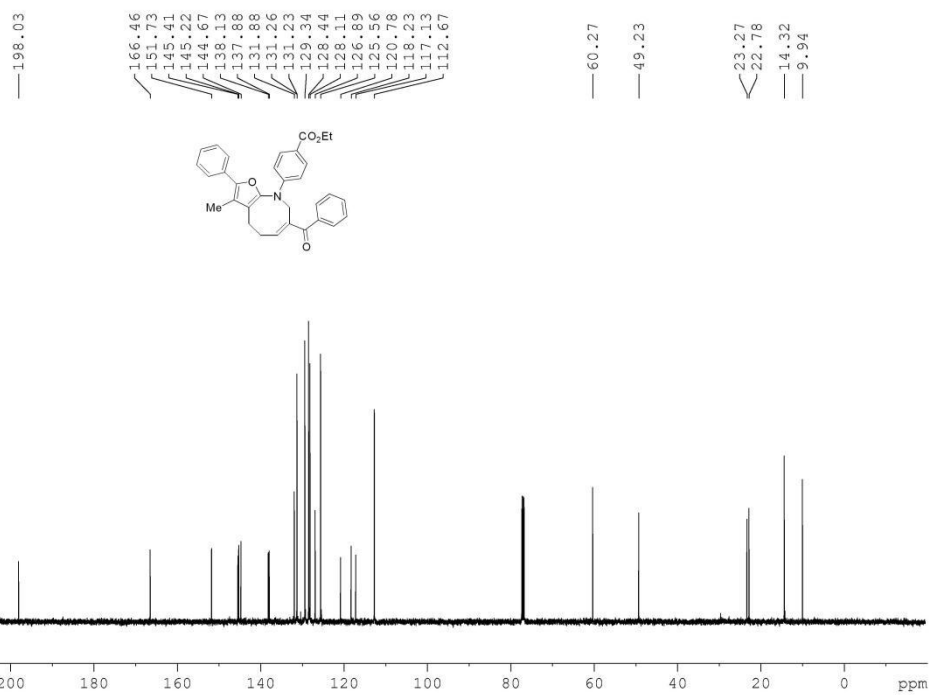

# Compound 3b

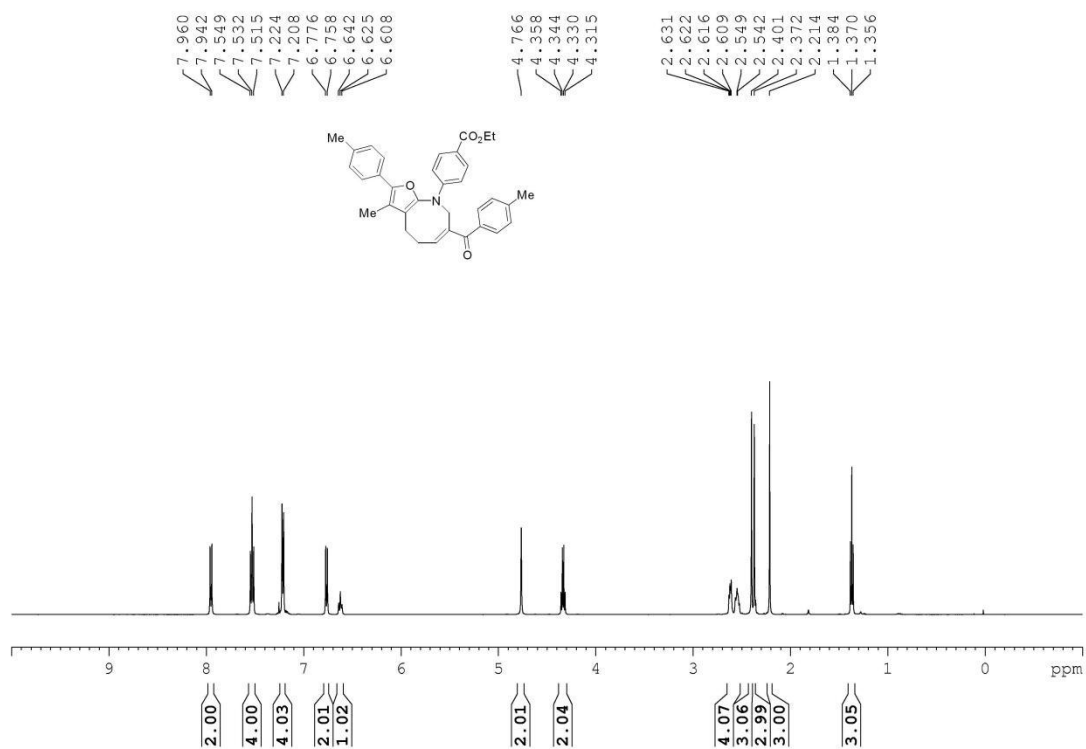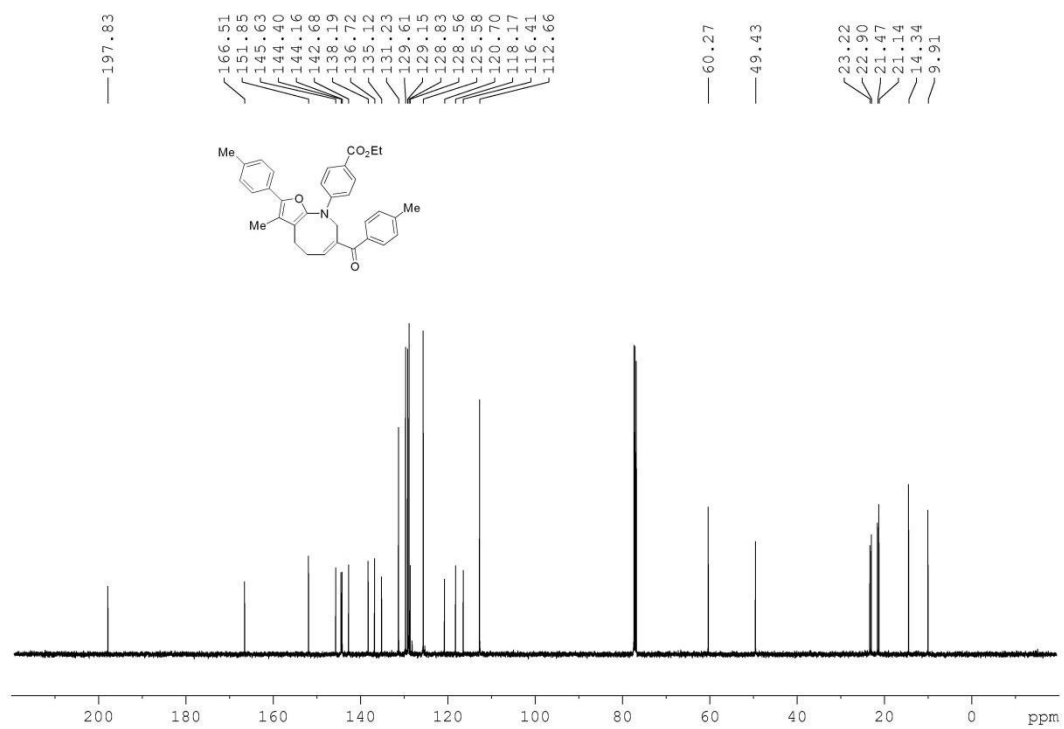

# Compound 3c

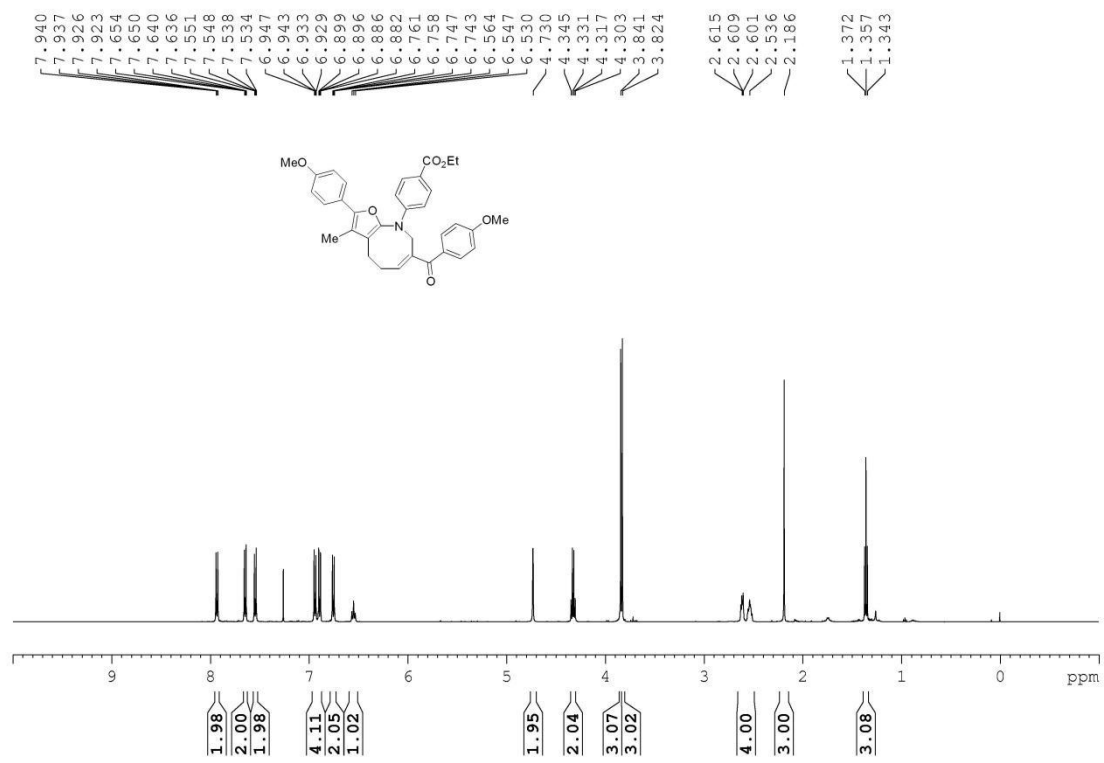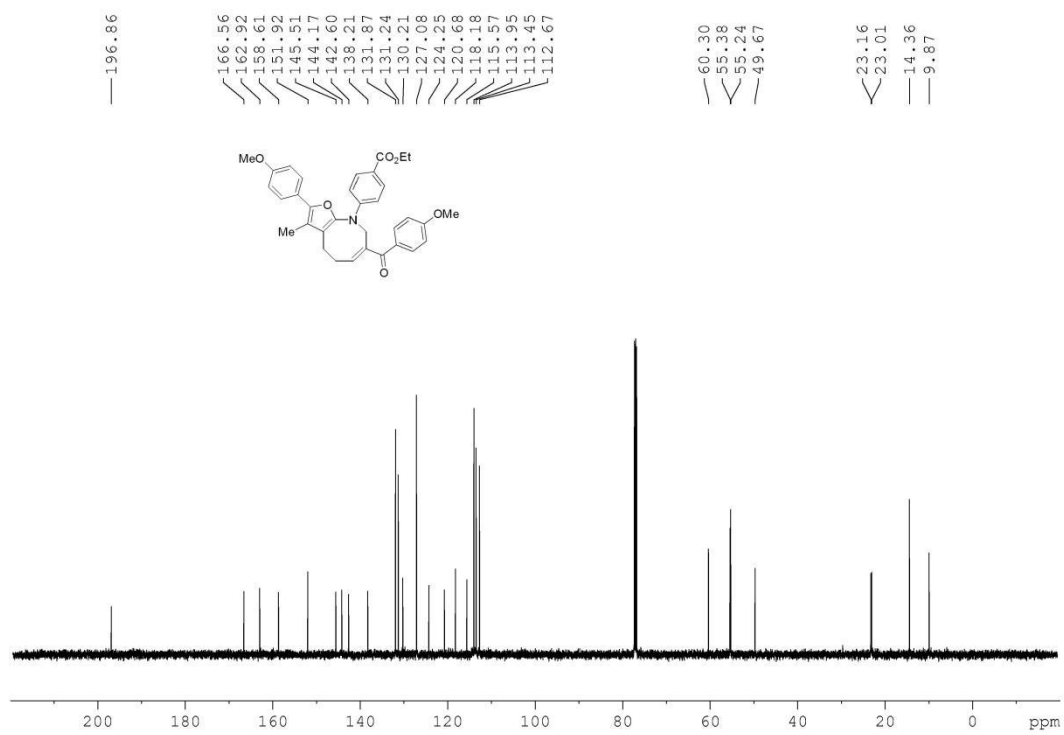

# Compound 3d

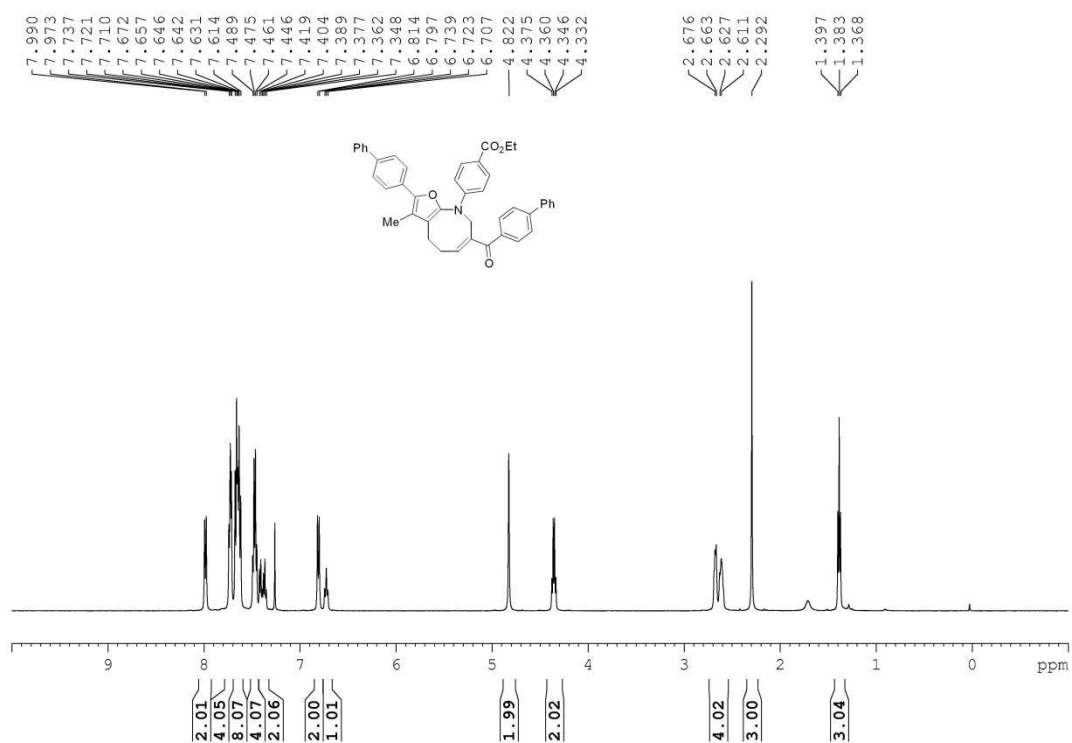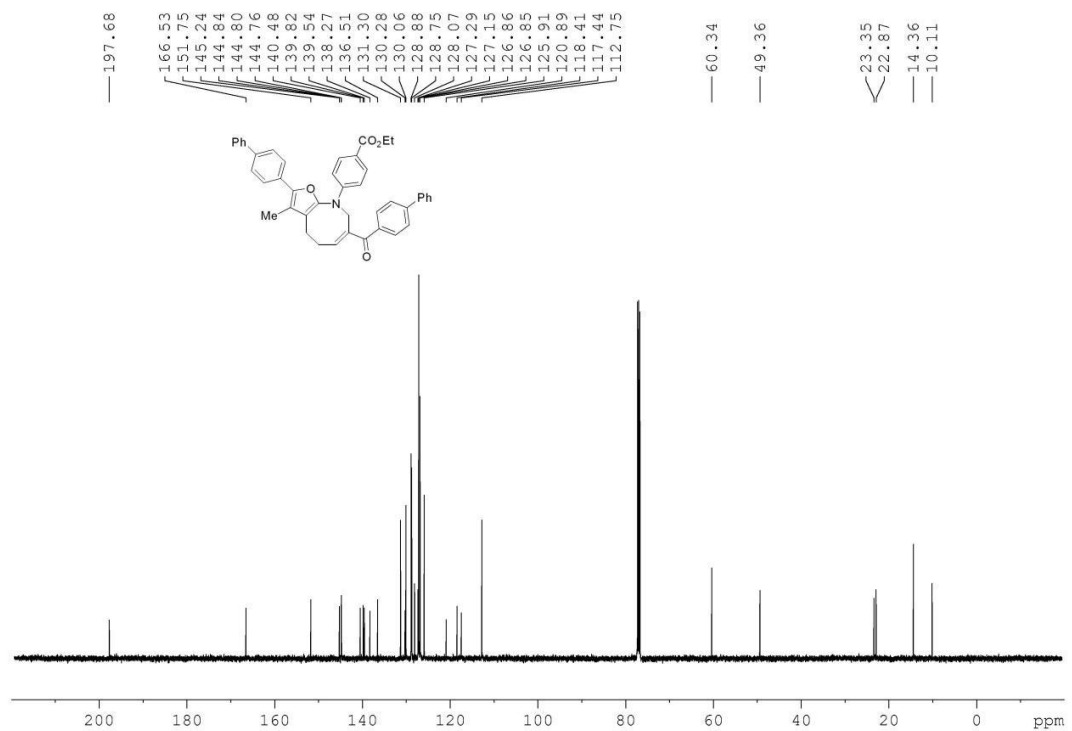

# Compound 3e

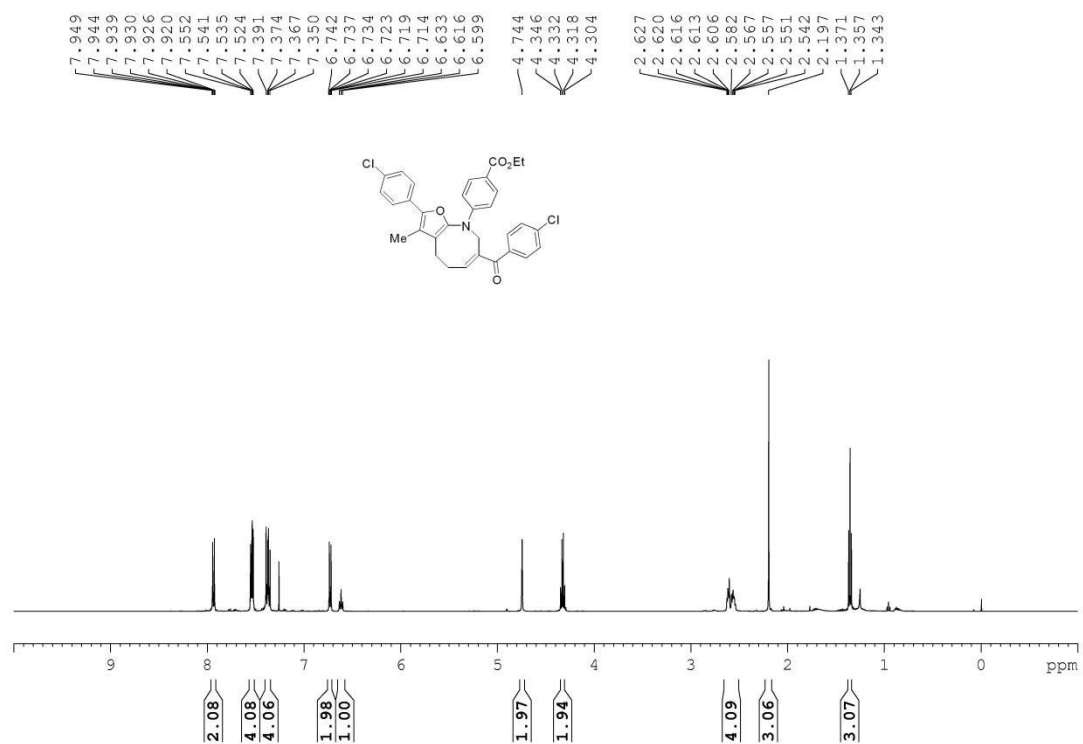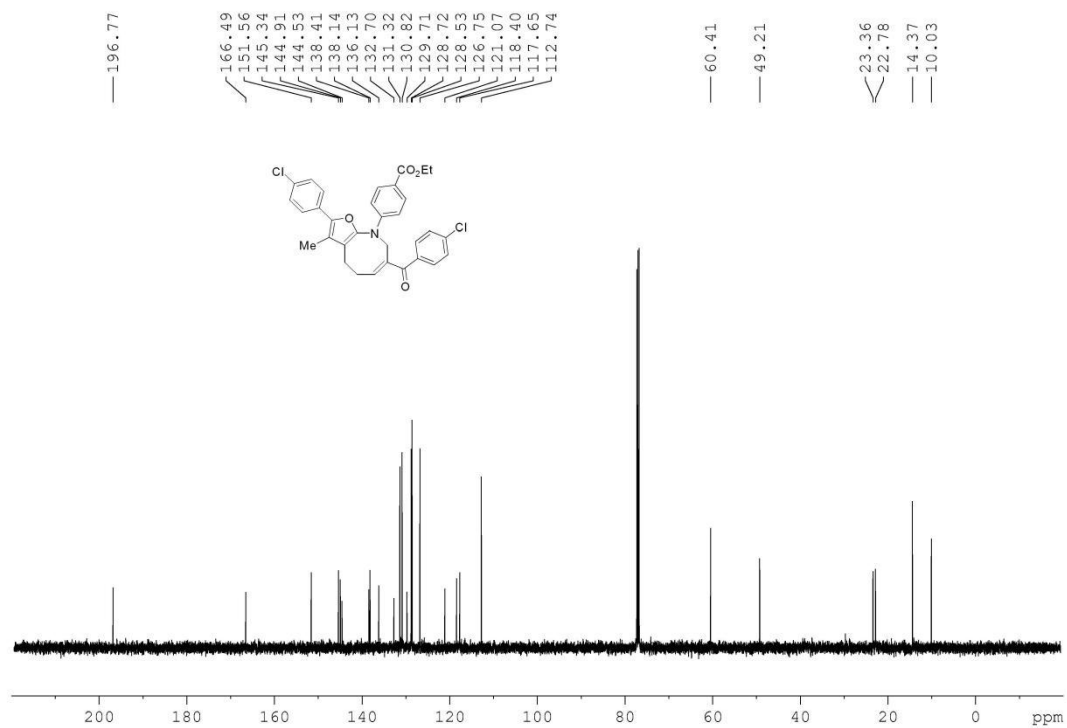

# Compound 3f

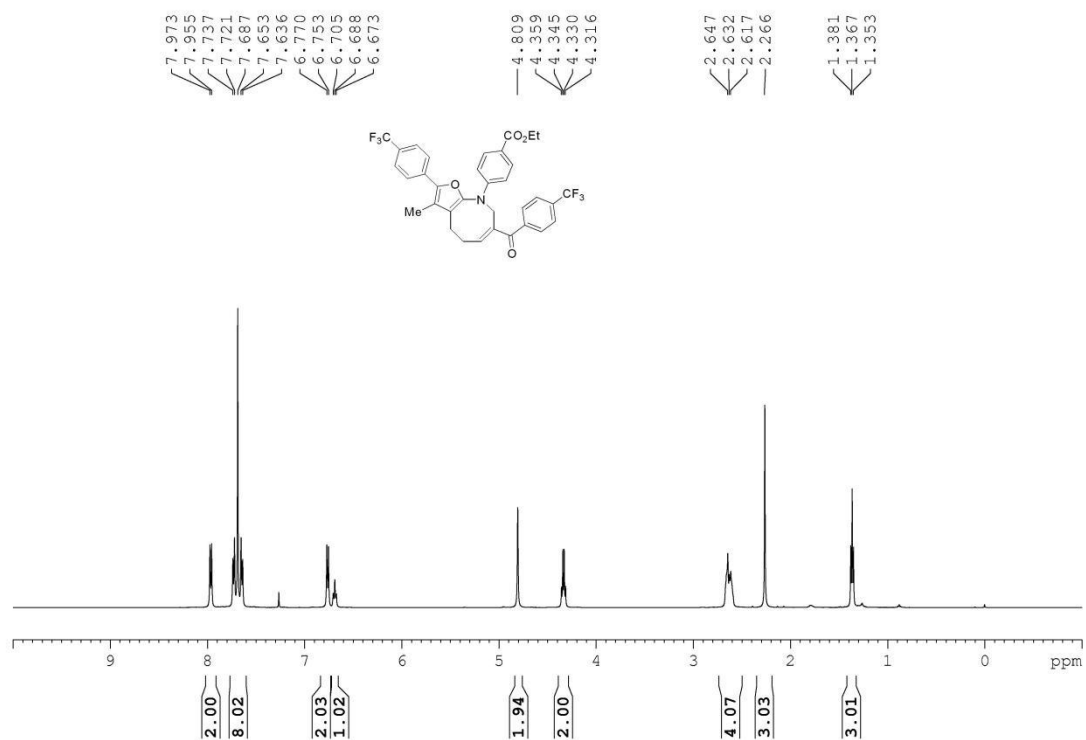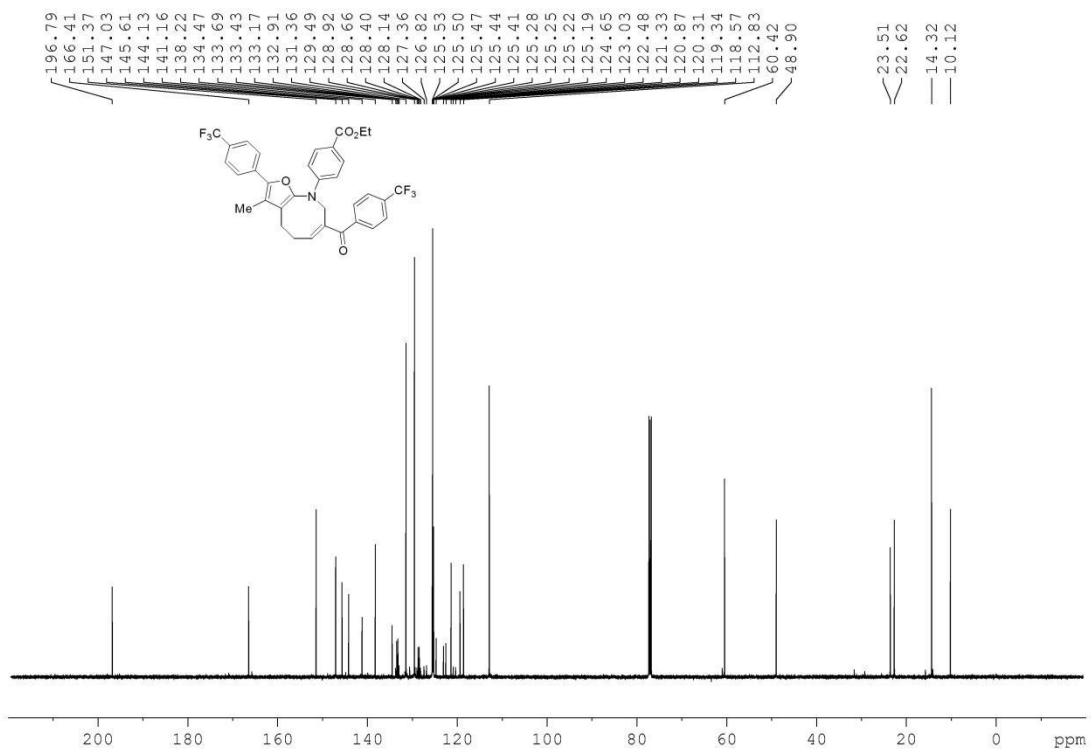



# Compound 3g

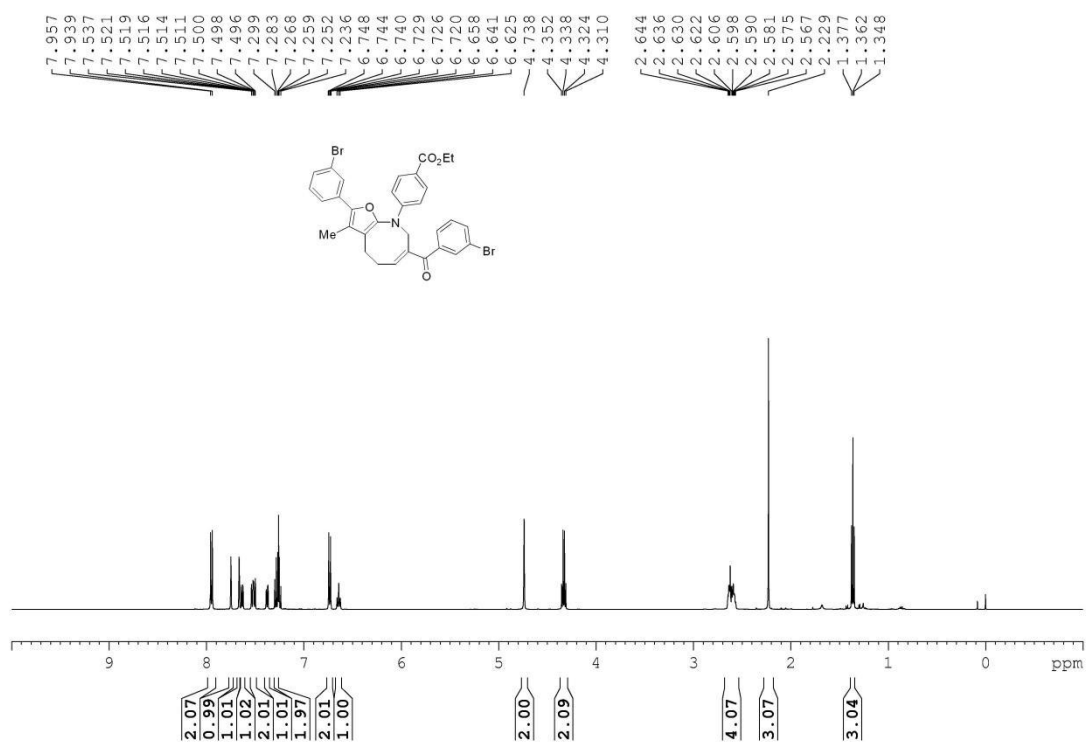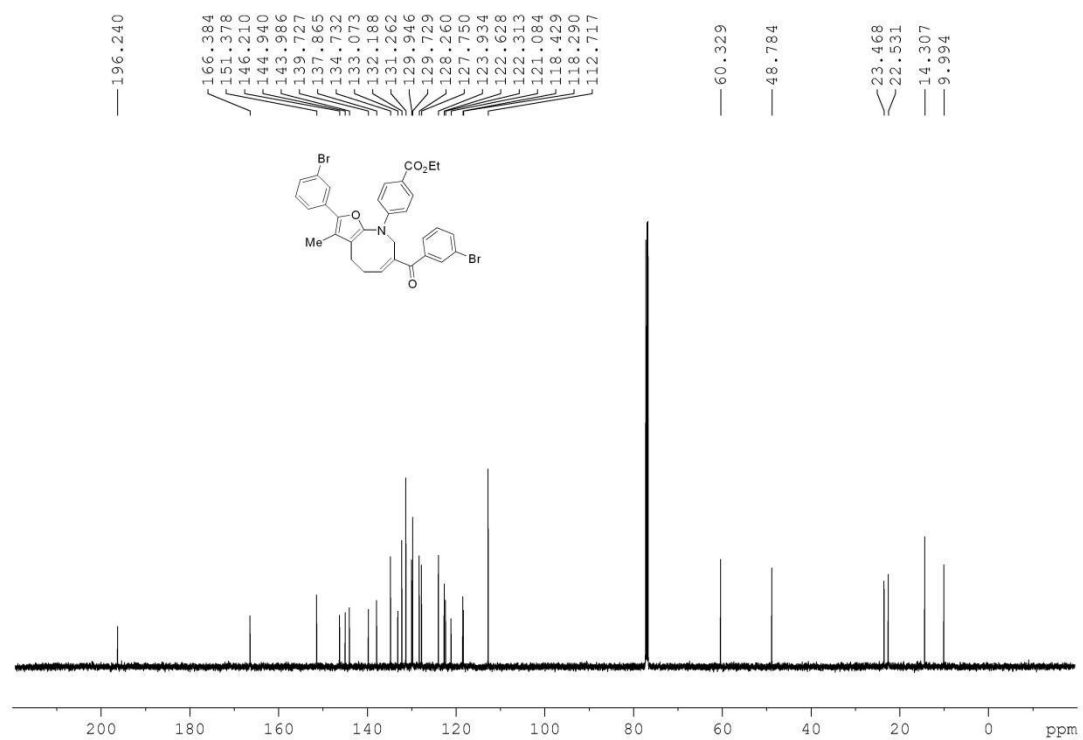

# Compound 3h

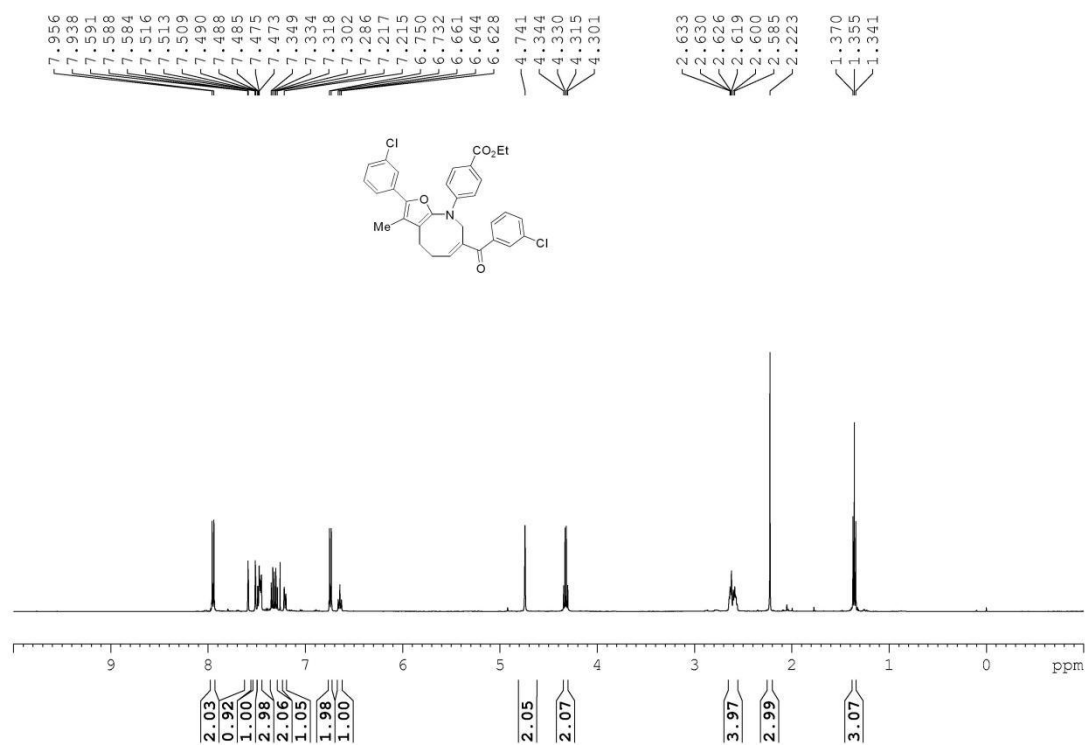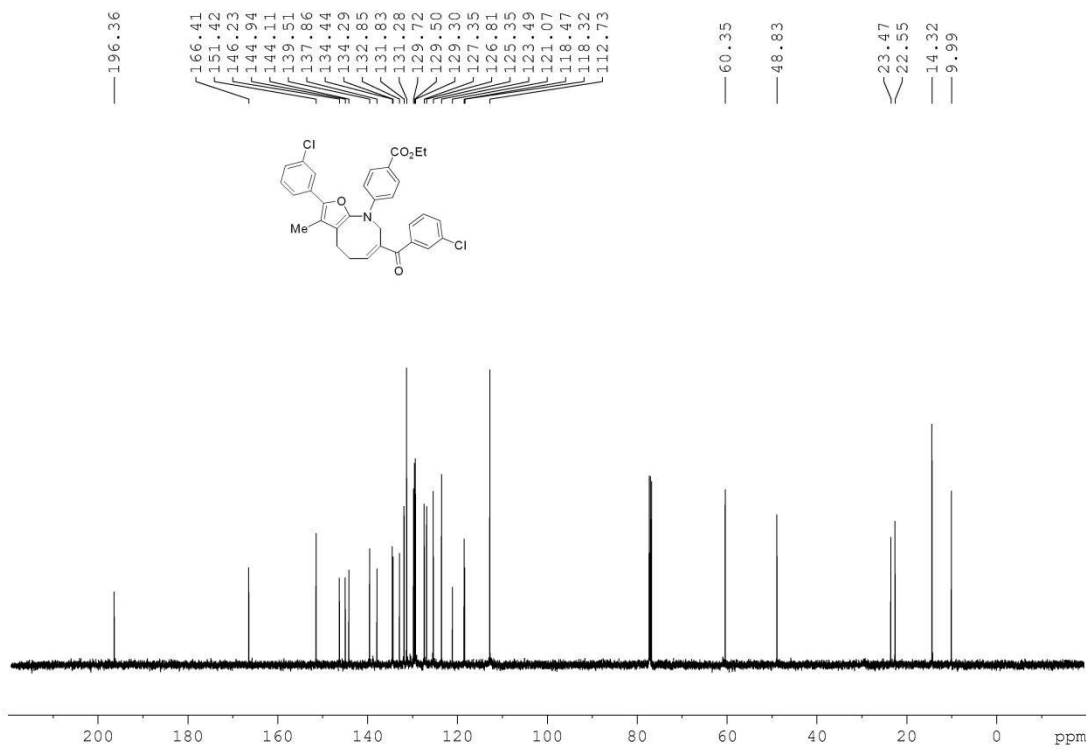

# Compound 3i

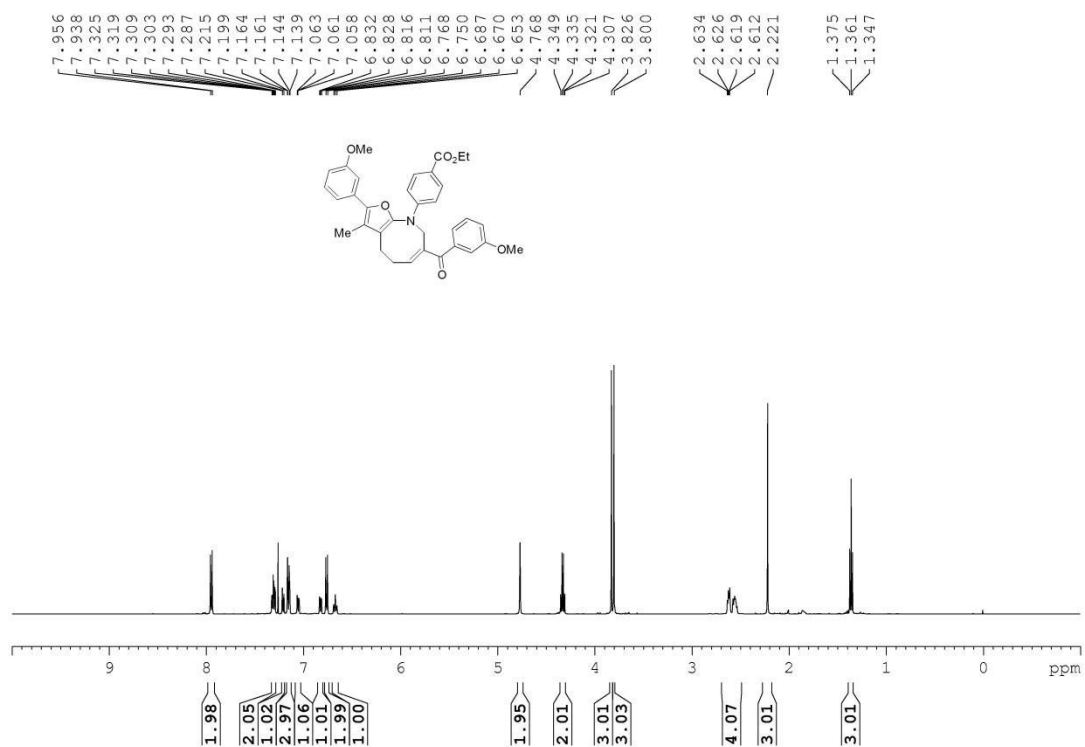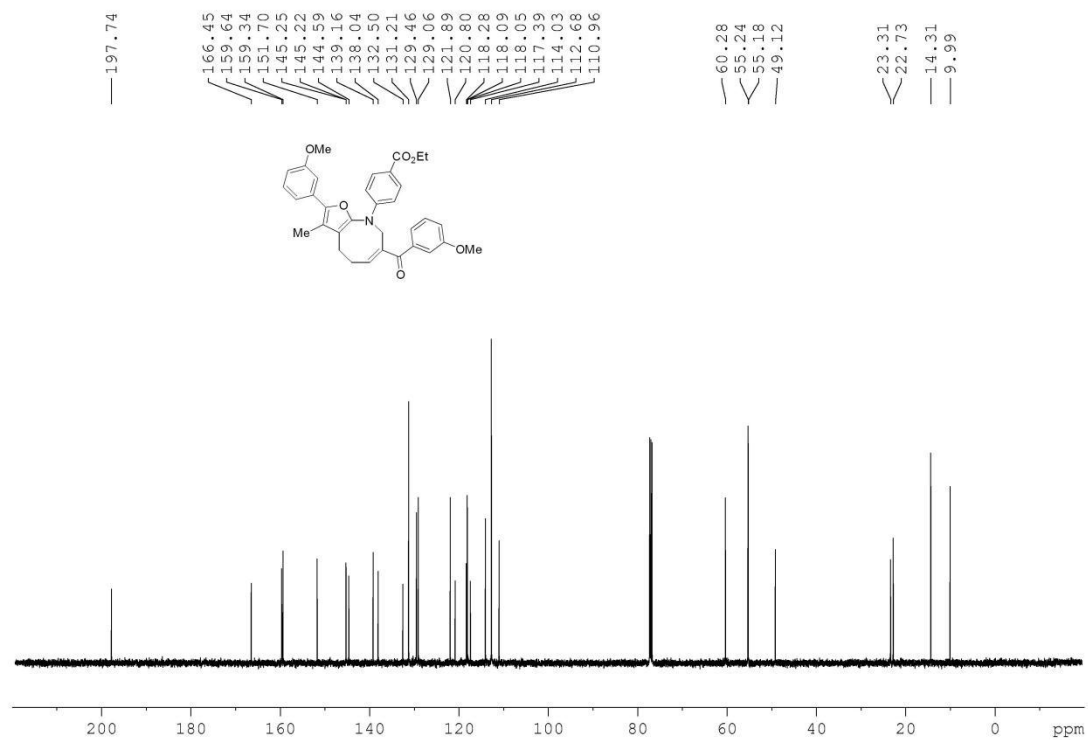

# Compound 3j

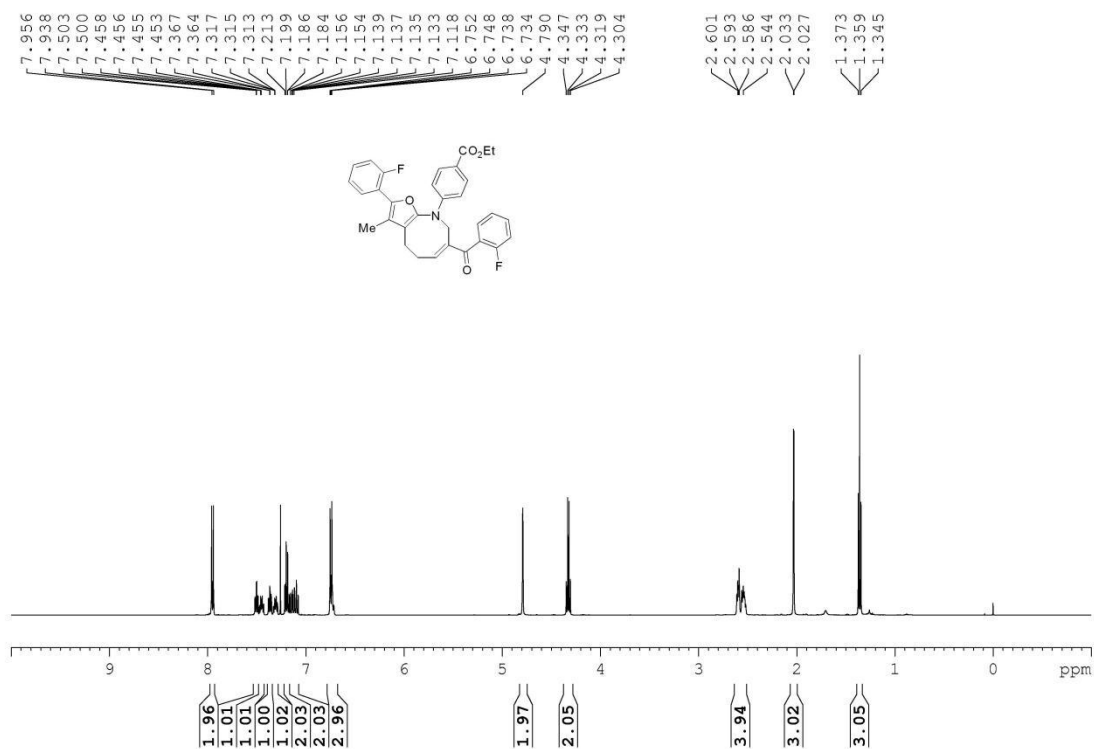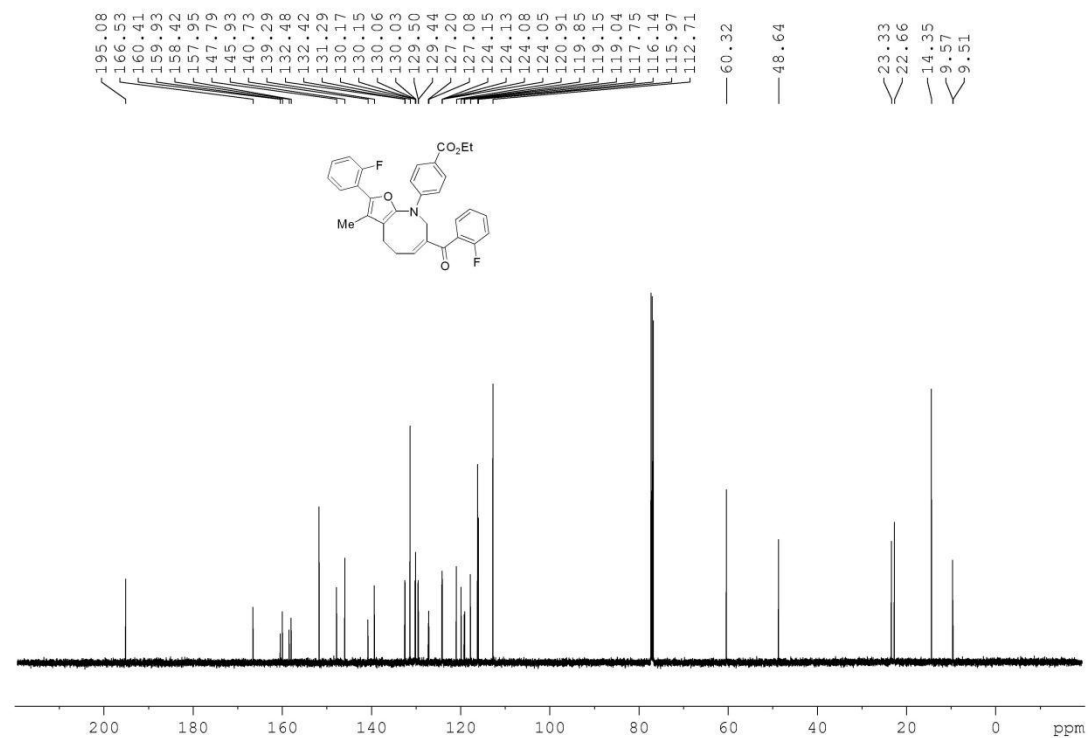

# Compound 3k

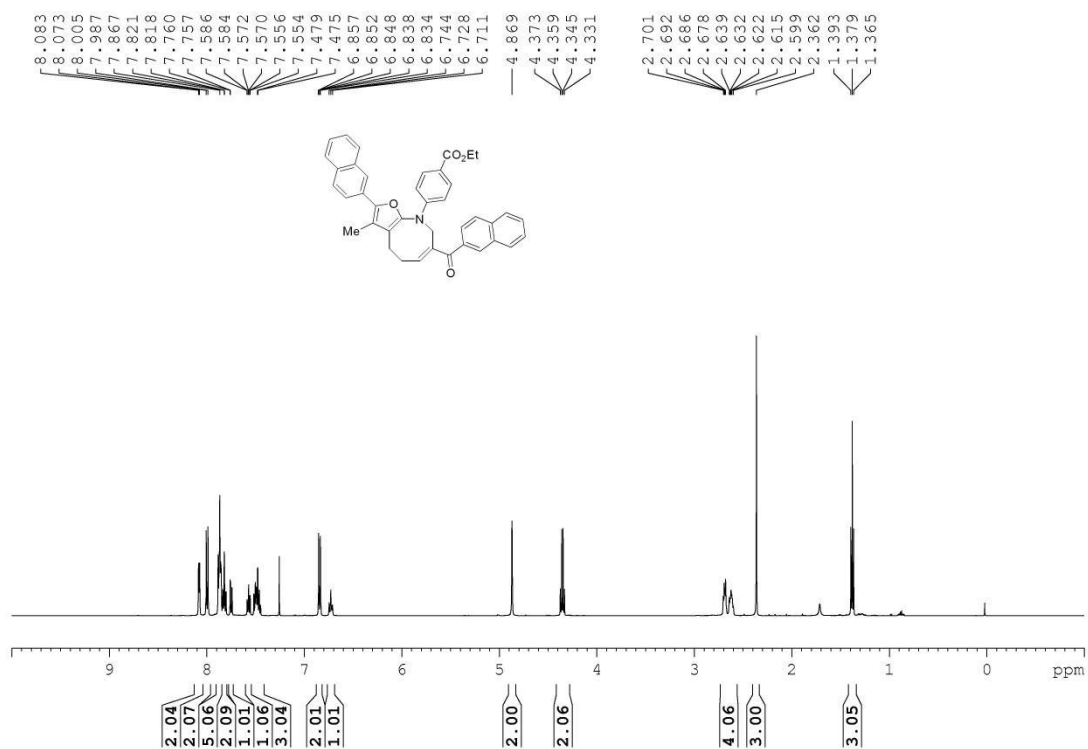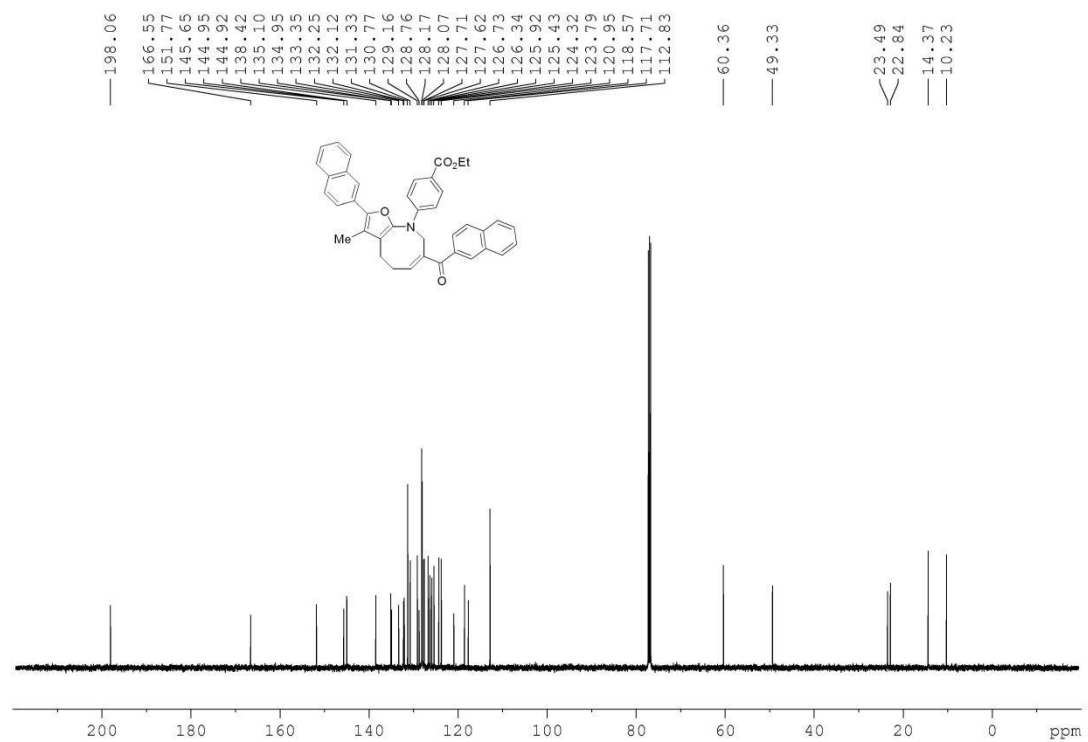

# Compound 31

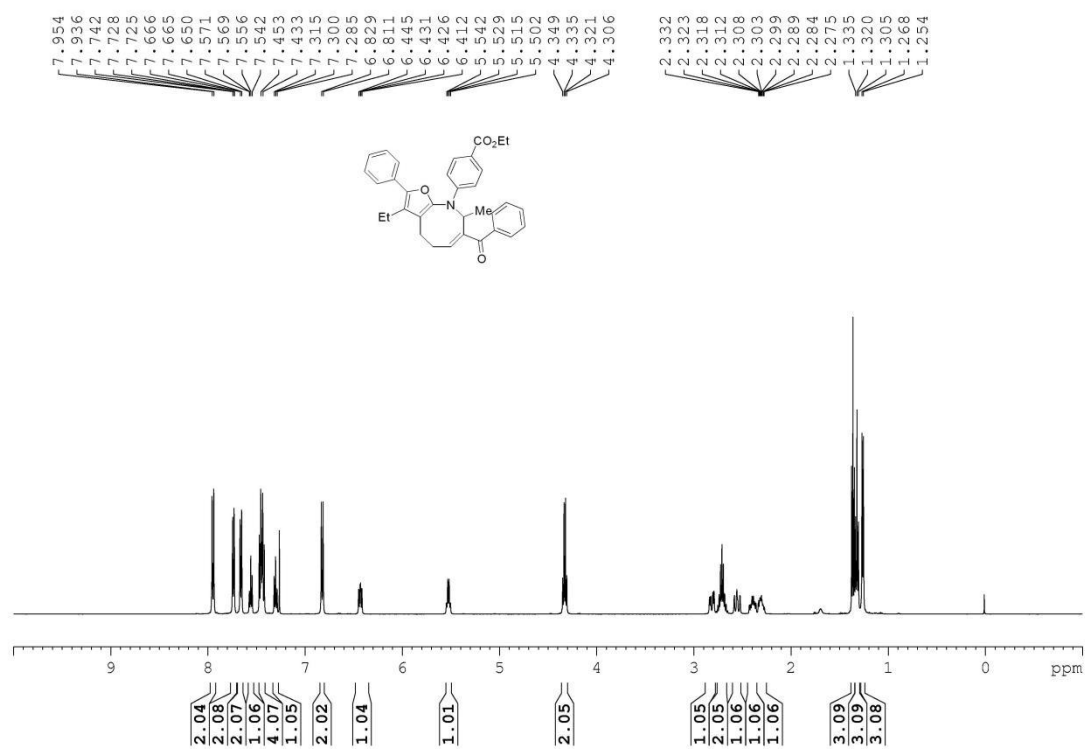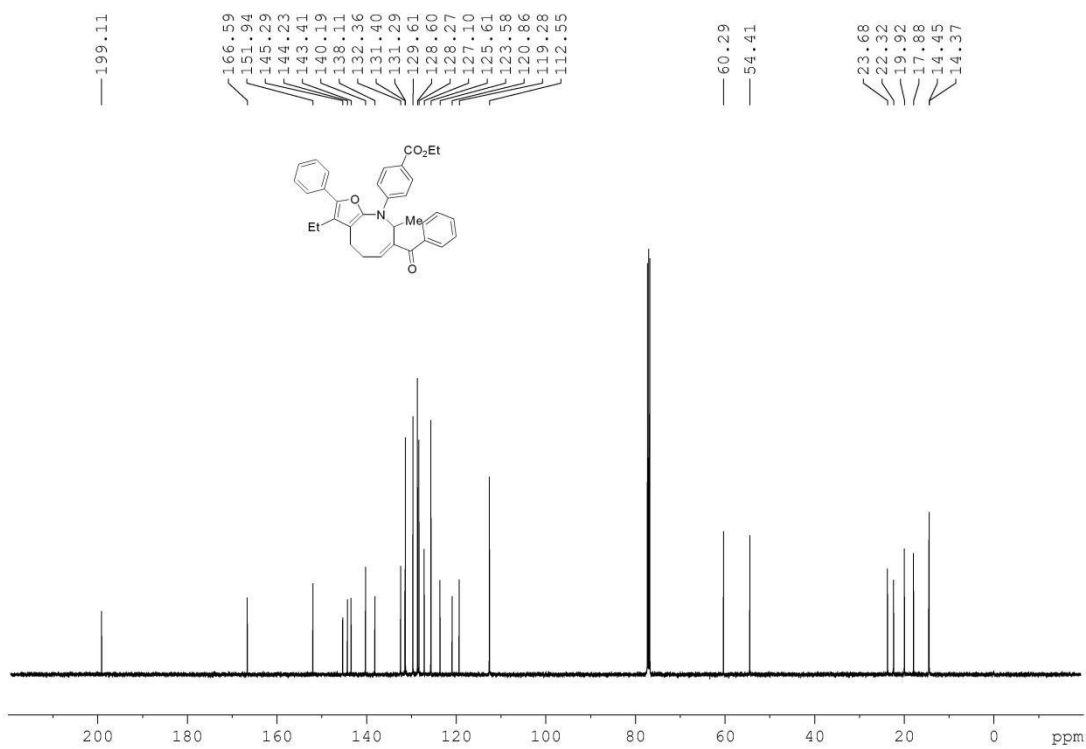

# Compound 3m

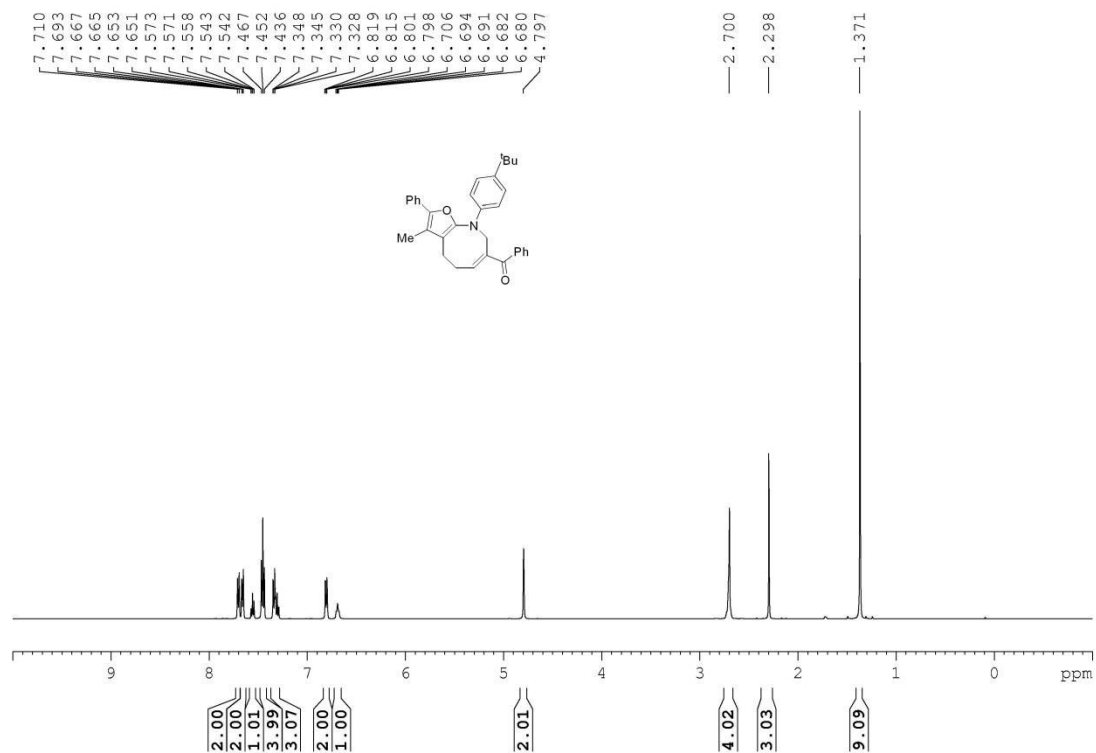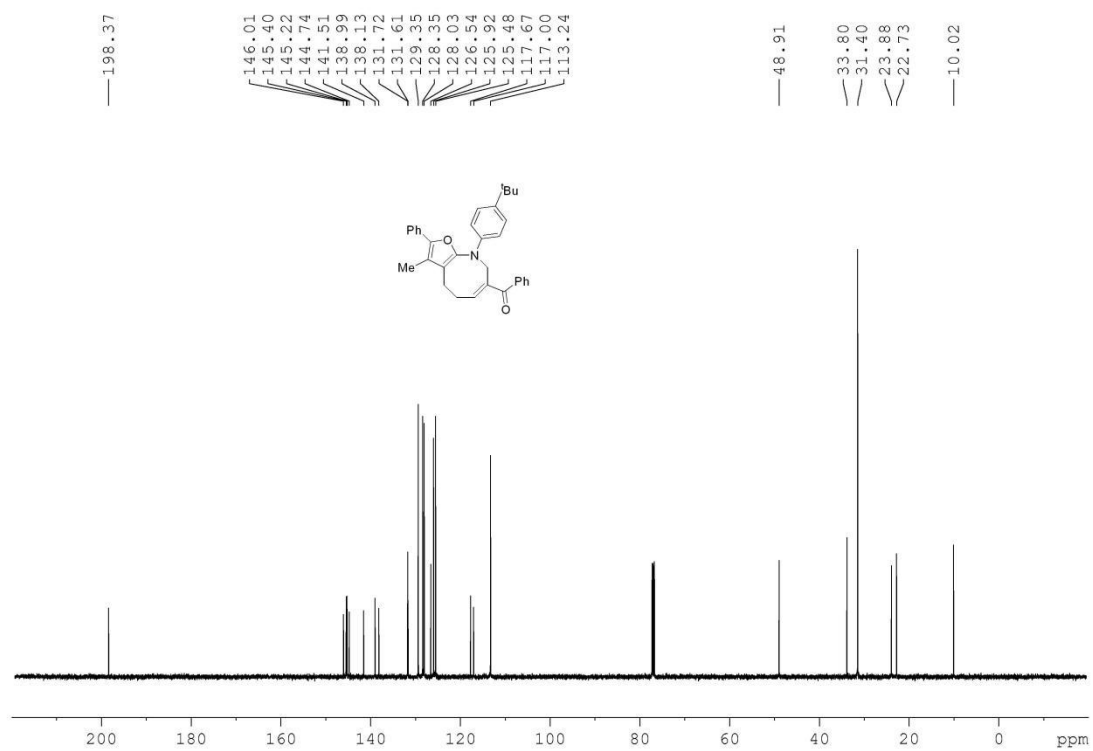

# Compound 3n

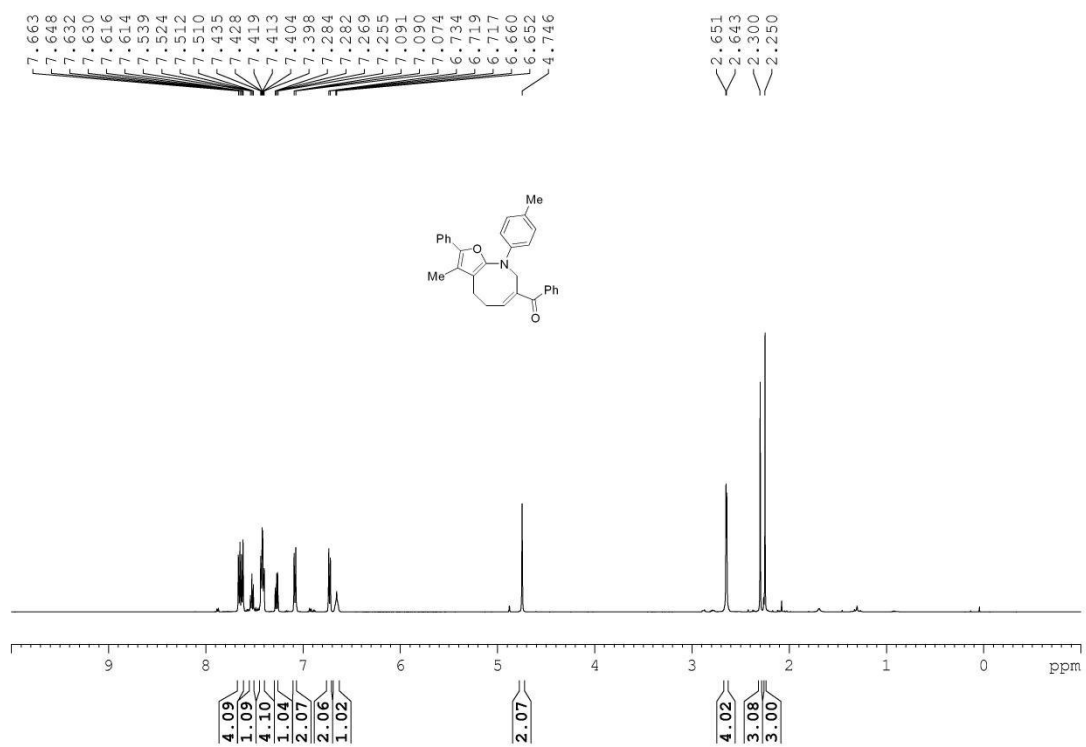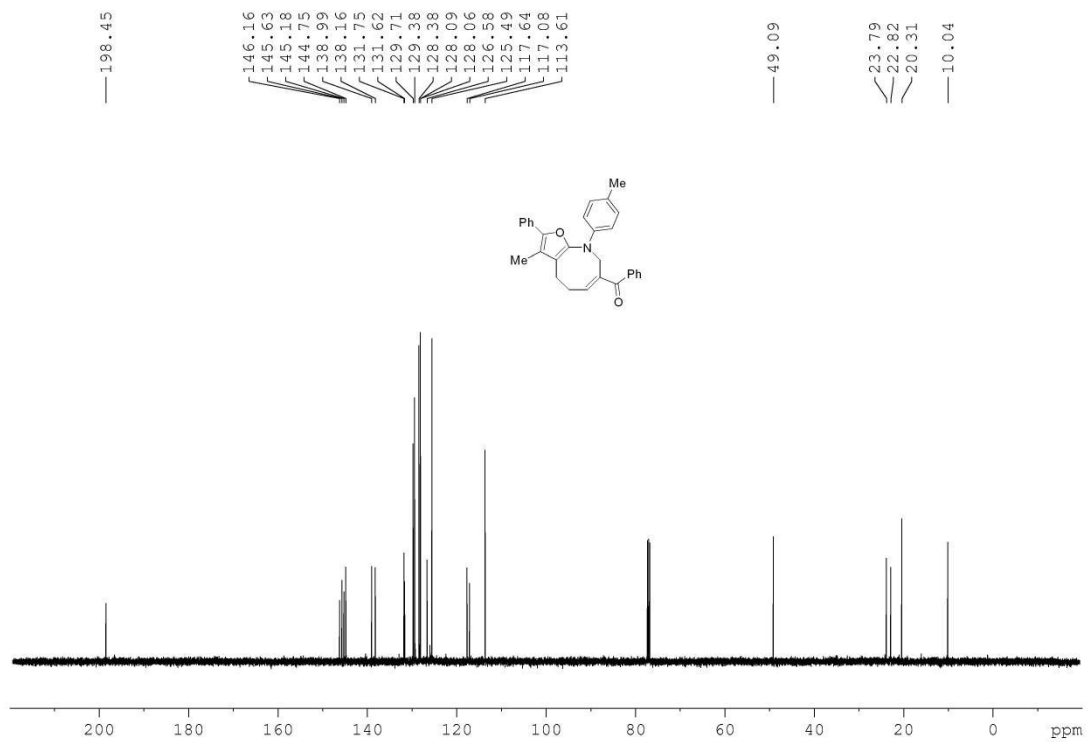



# Compound 3o

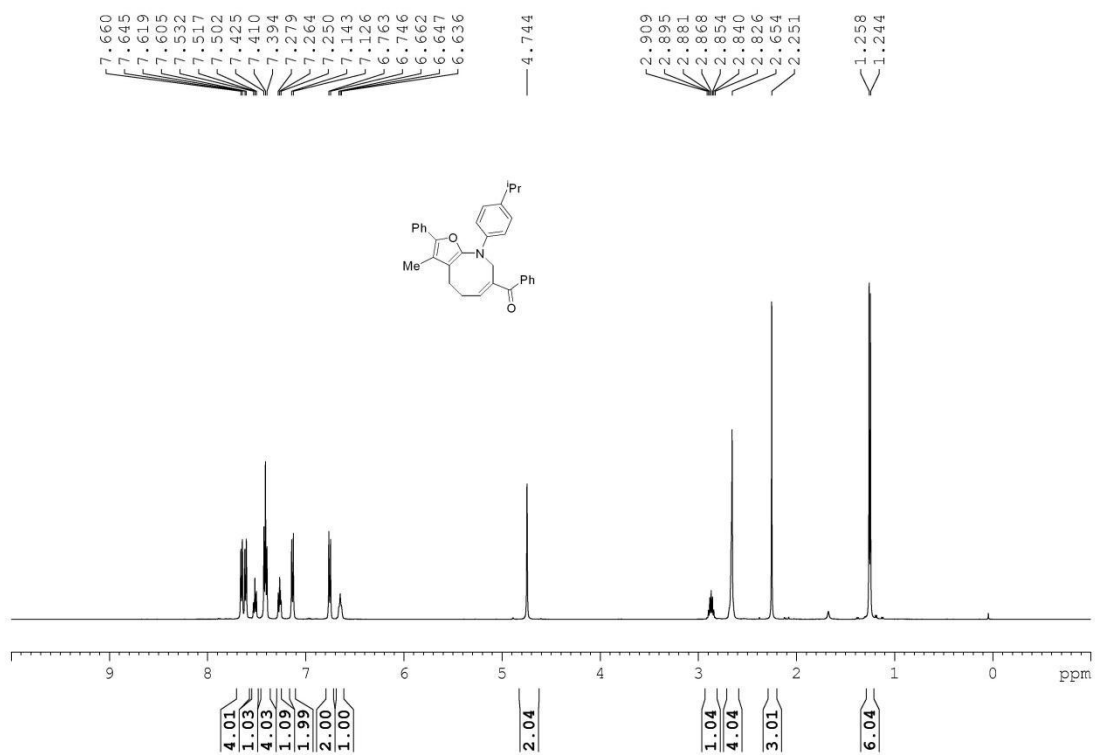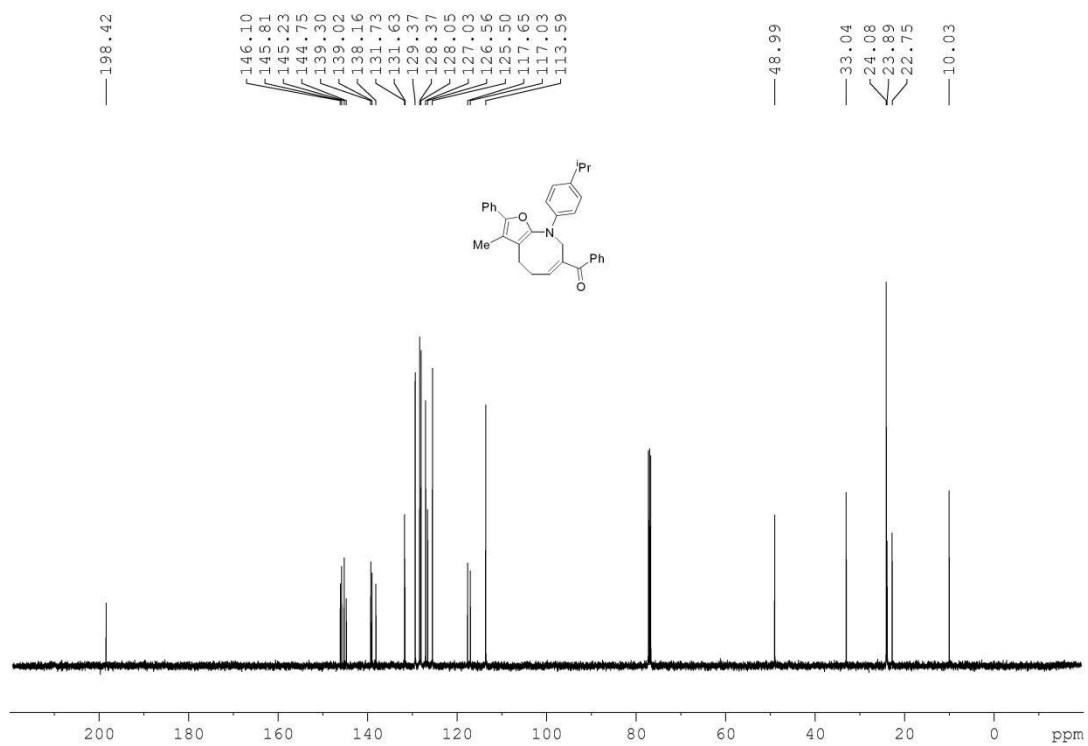

# Compound 3p

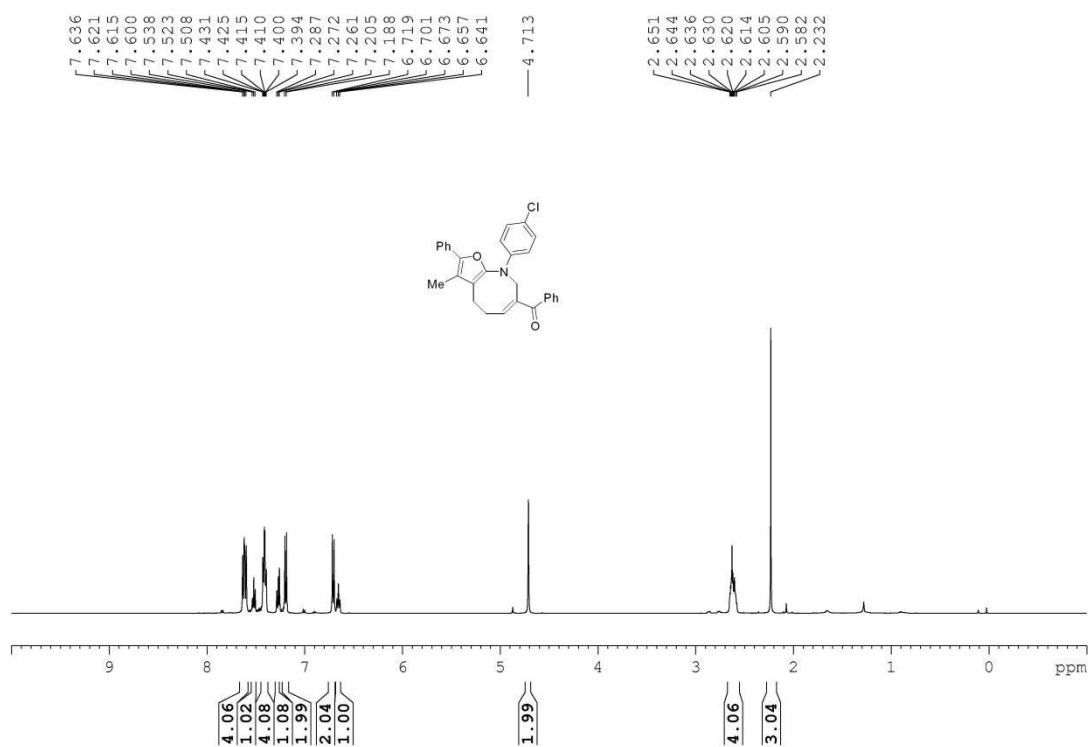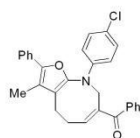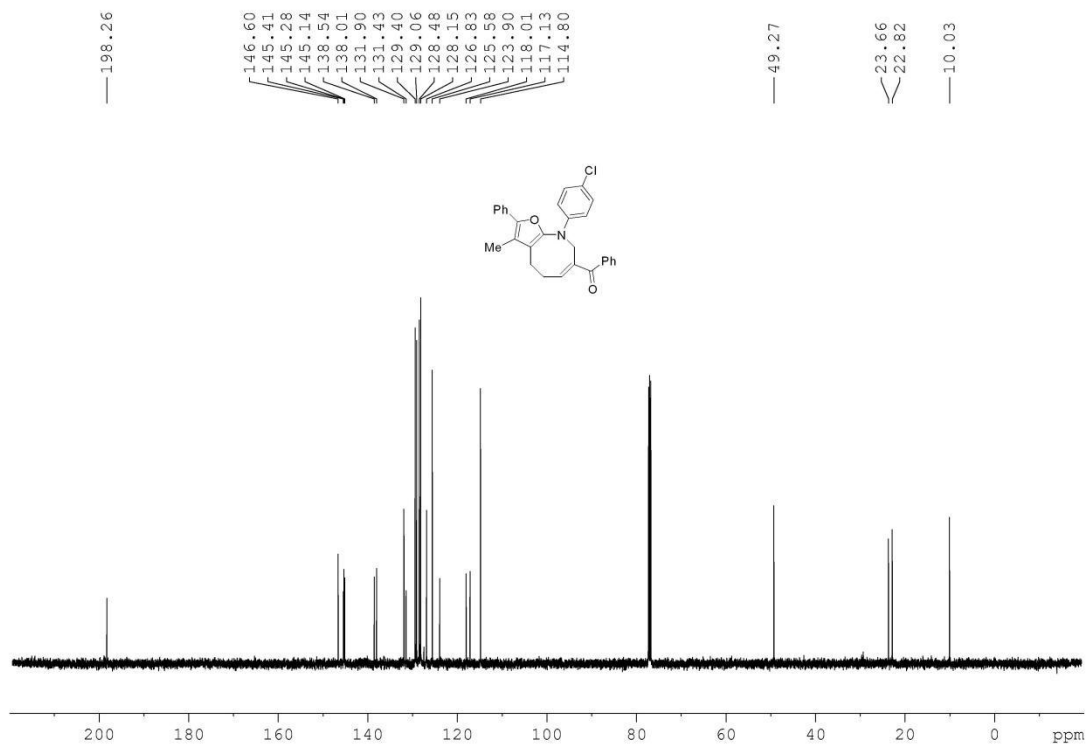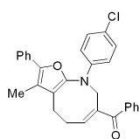

# Compound 3q

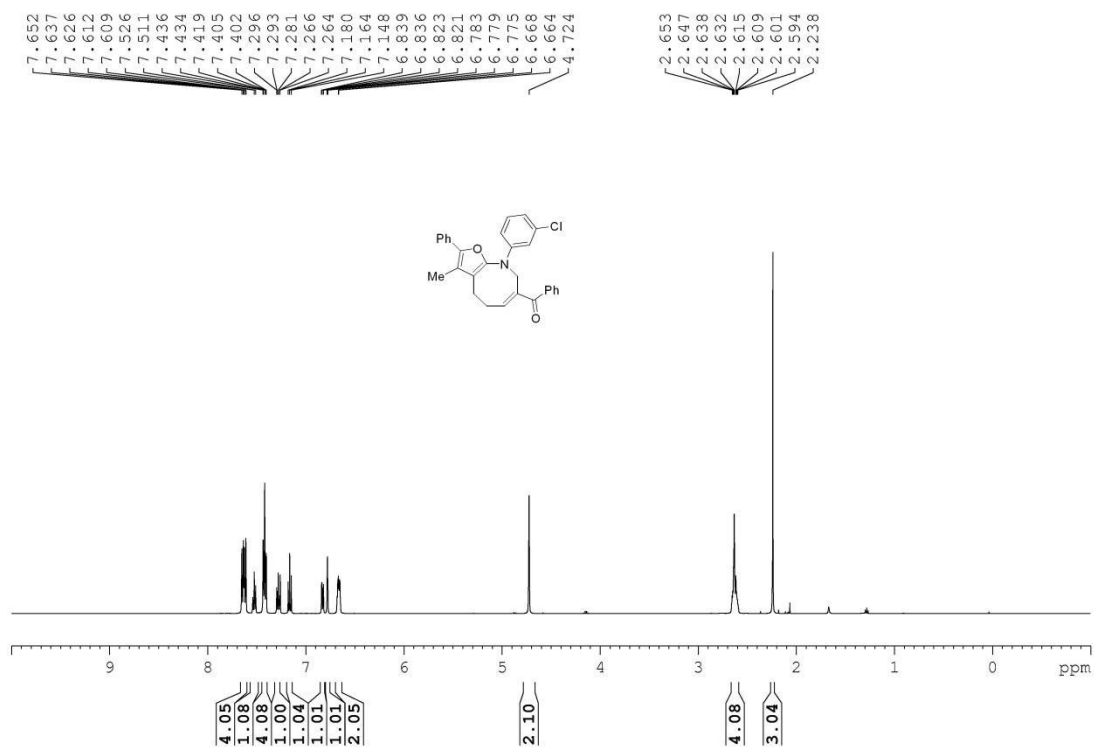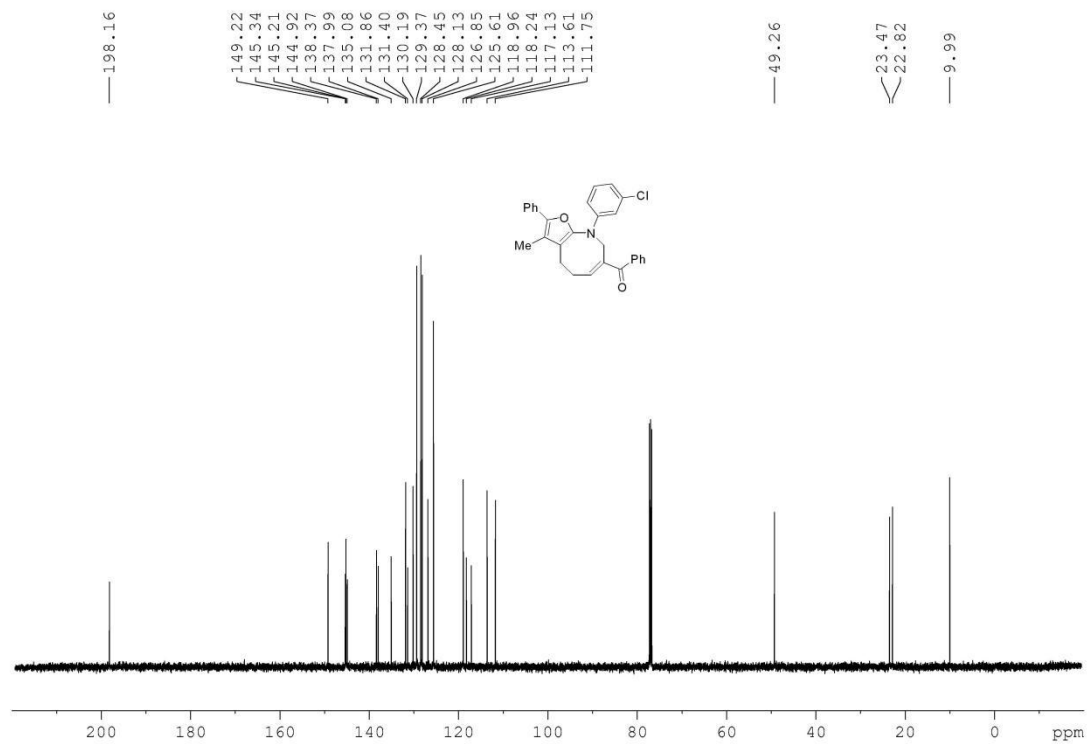

# Compound 3r

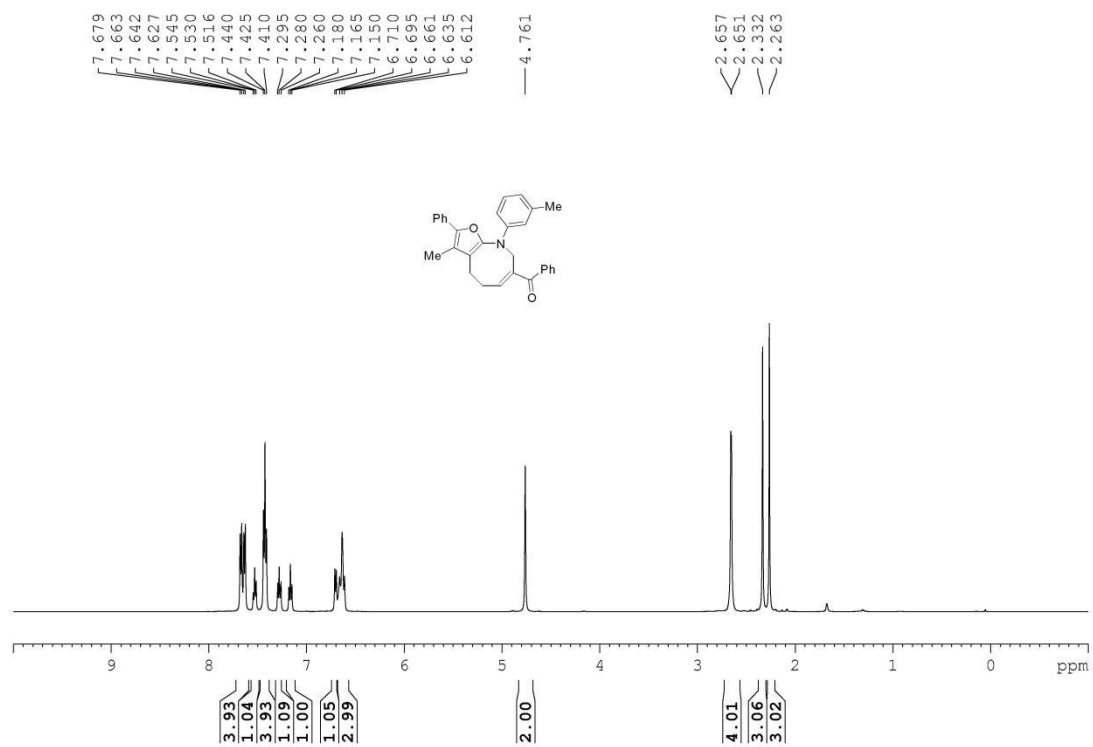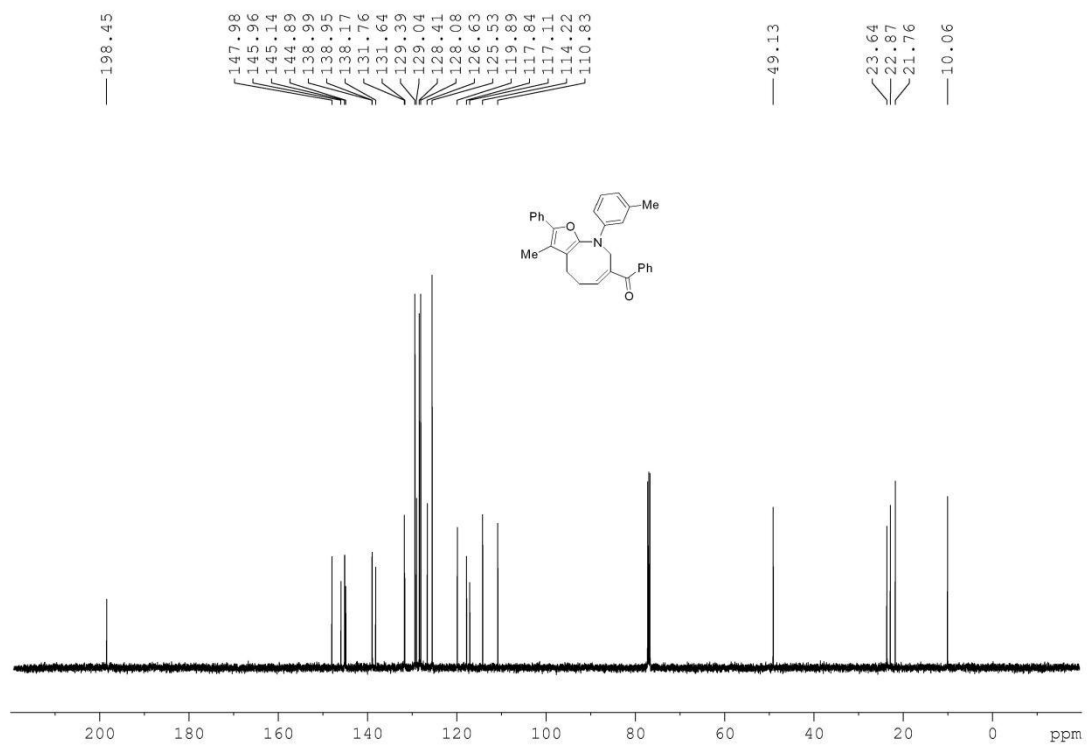

# Compound 3s

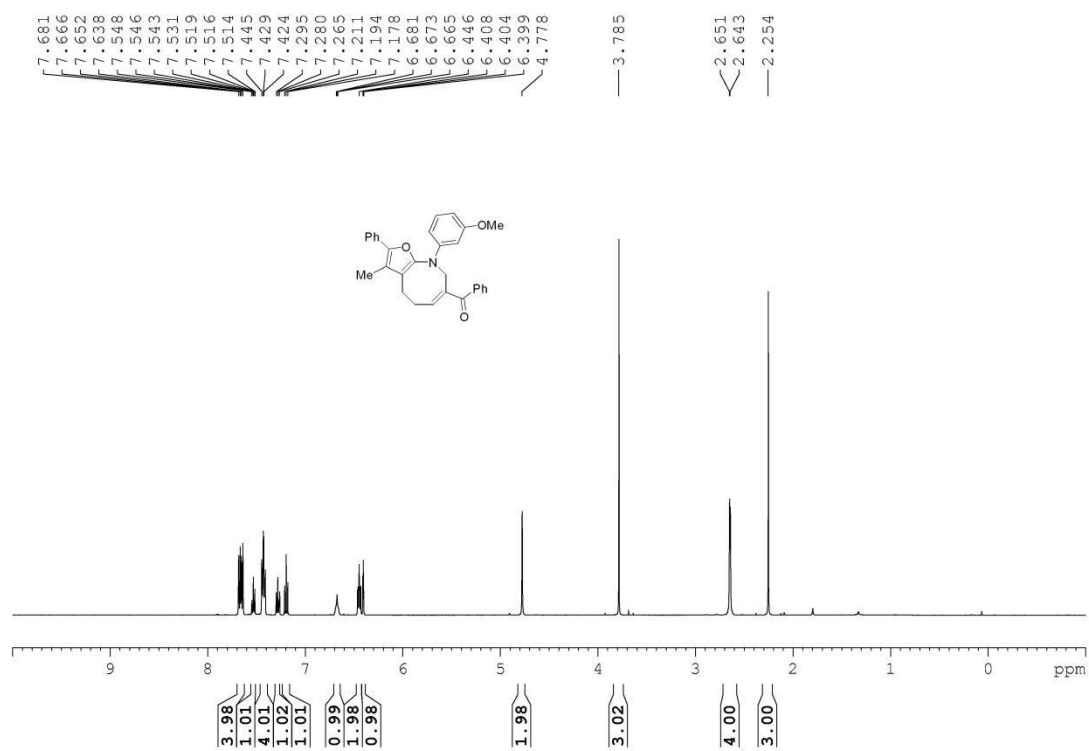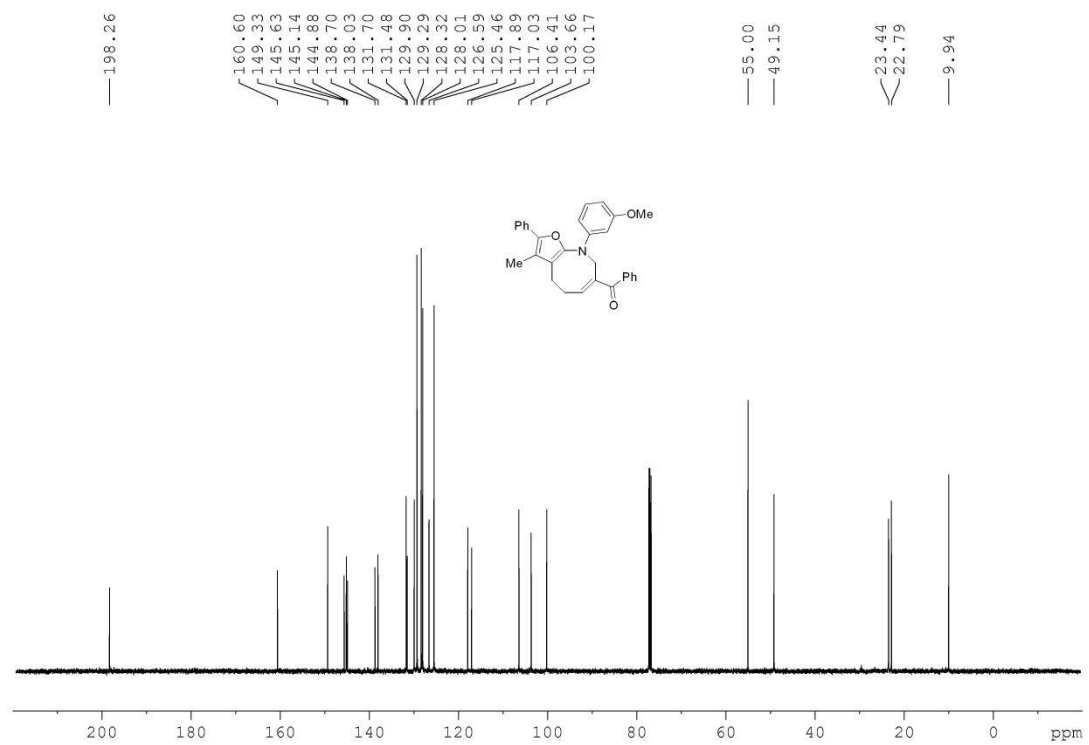

# Compound 3t

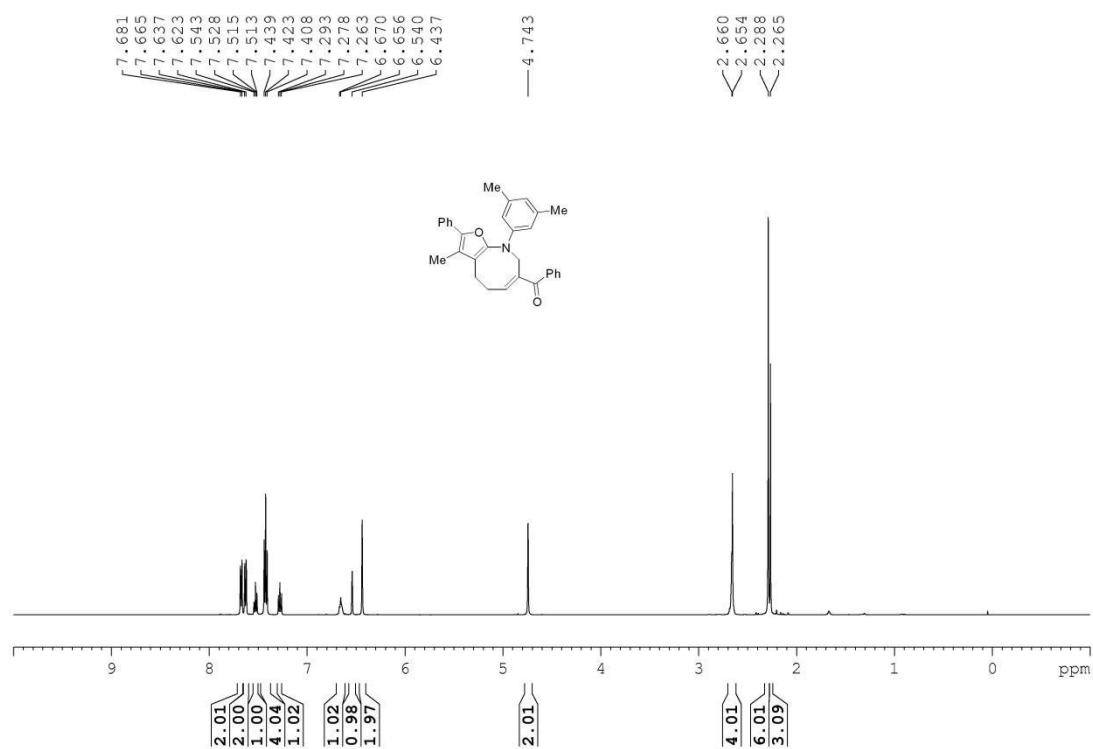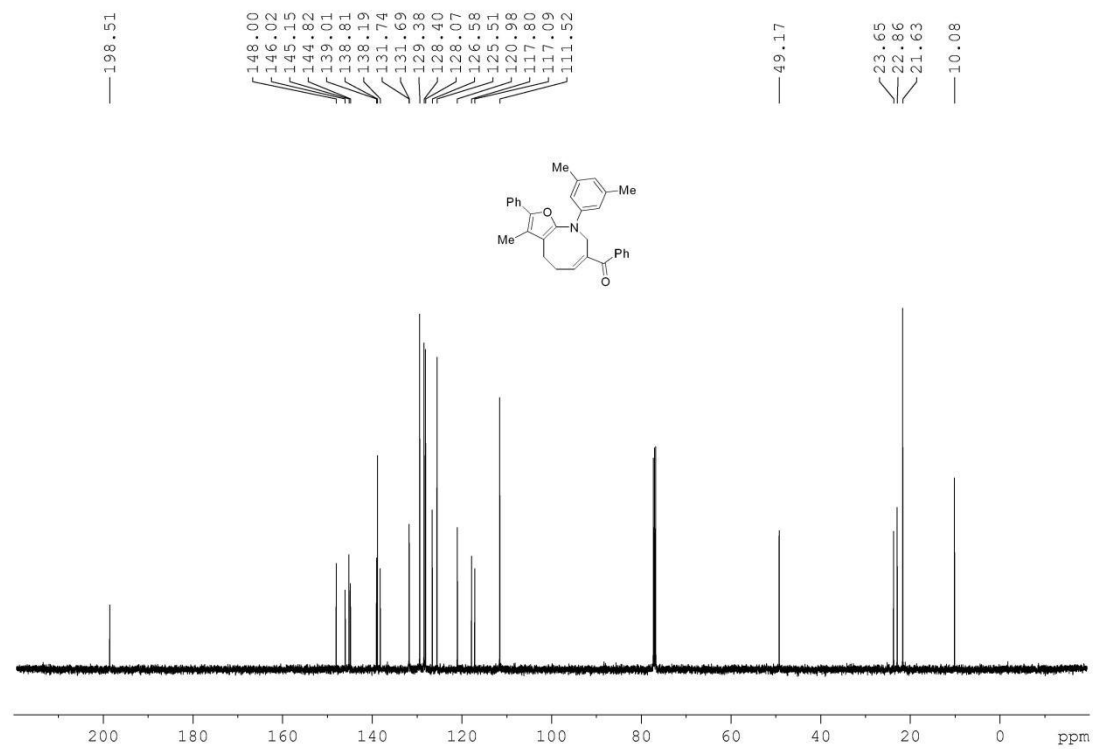

# Compound 3u

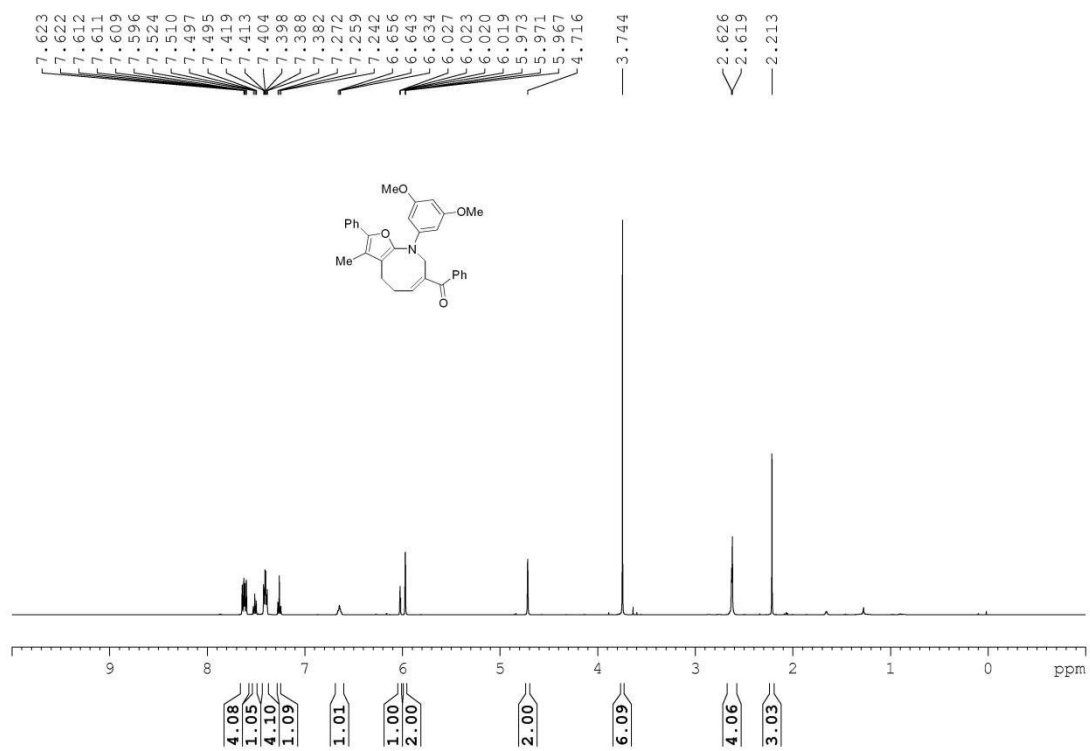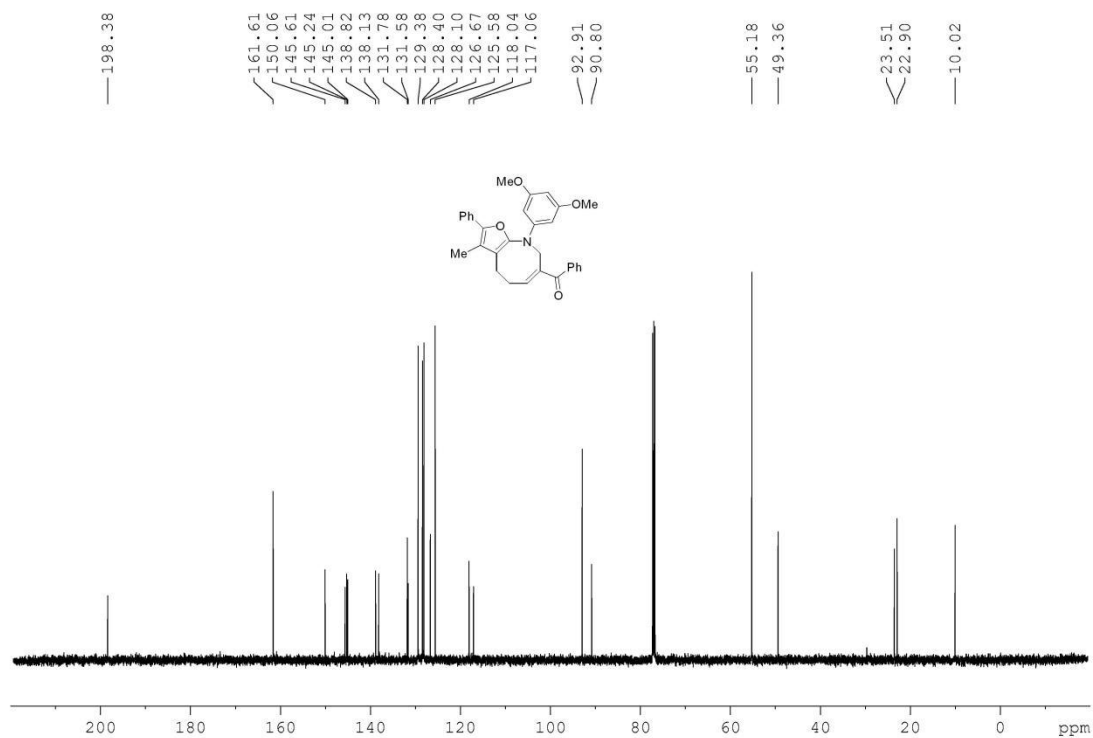

# Compound 4a

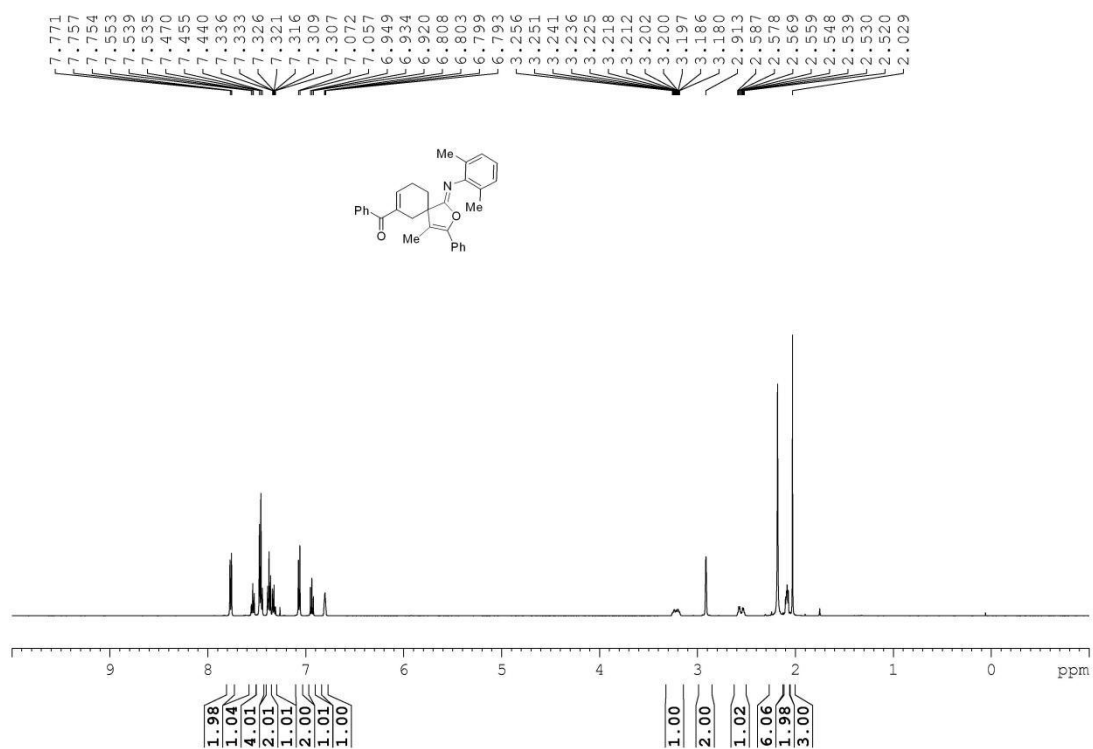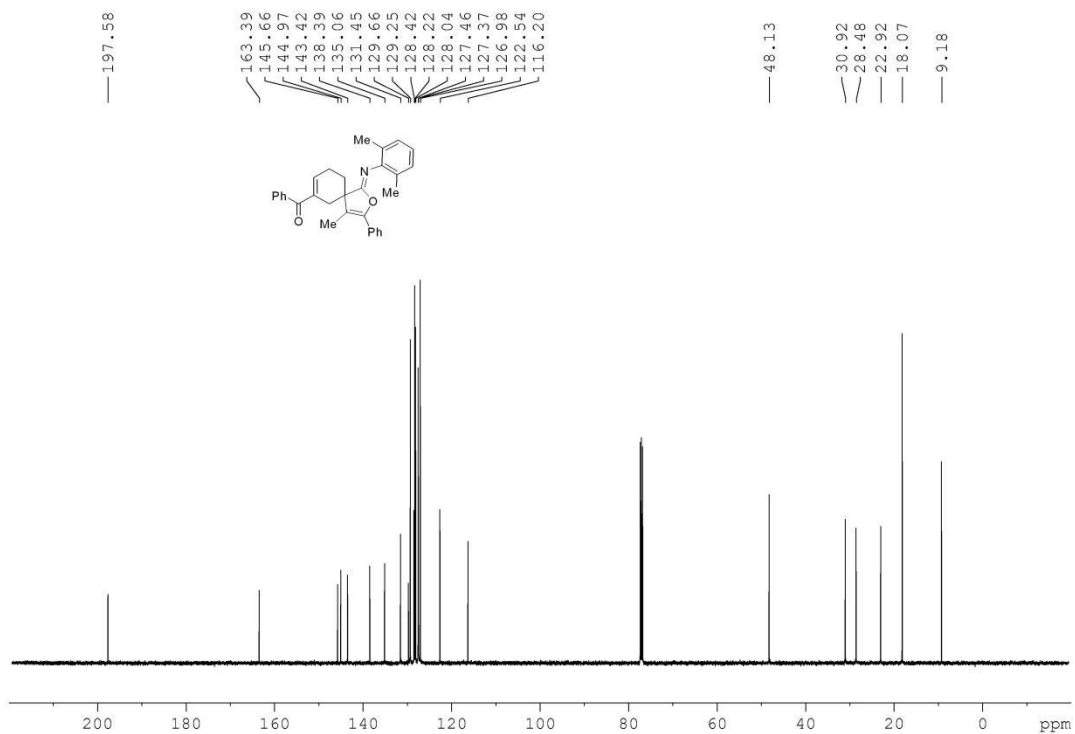



# Compound 4b

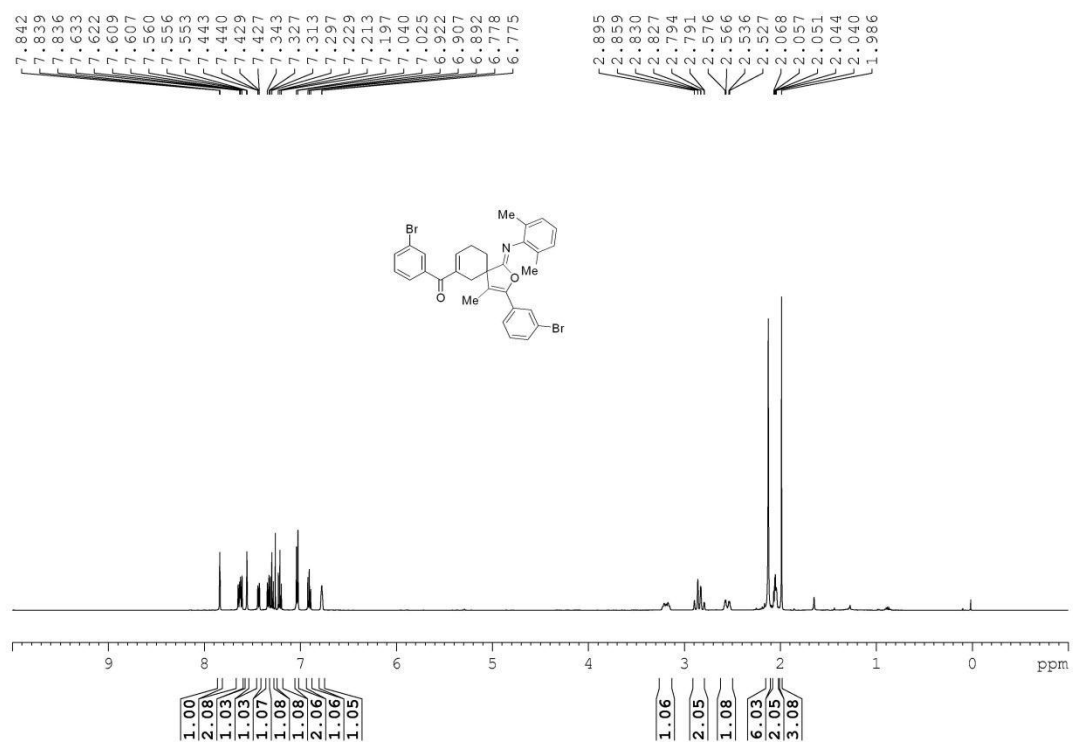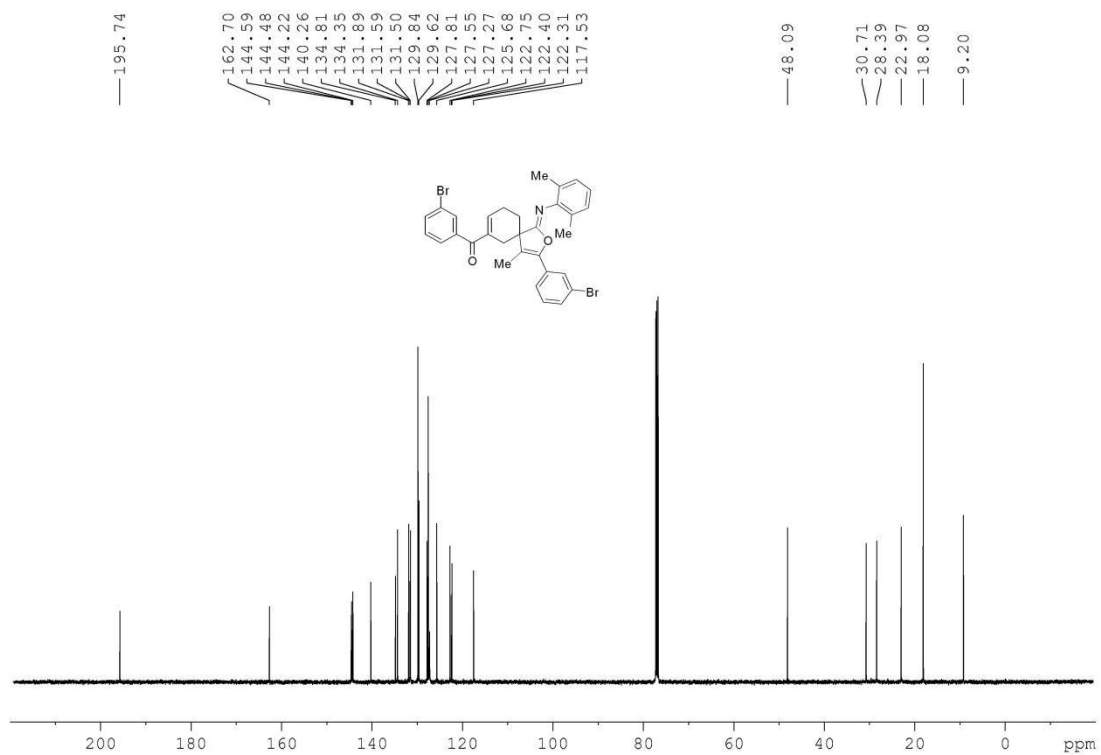

# Compound 4c

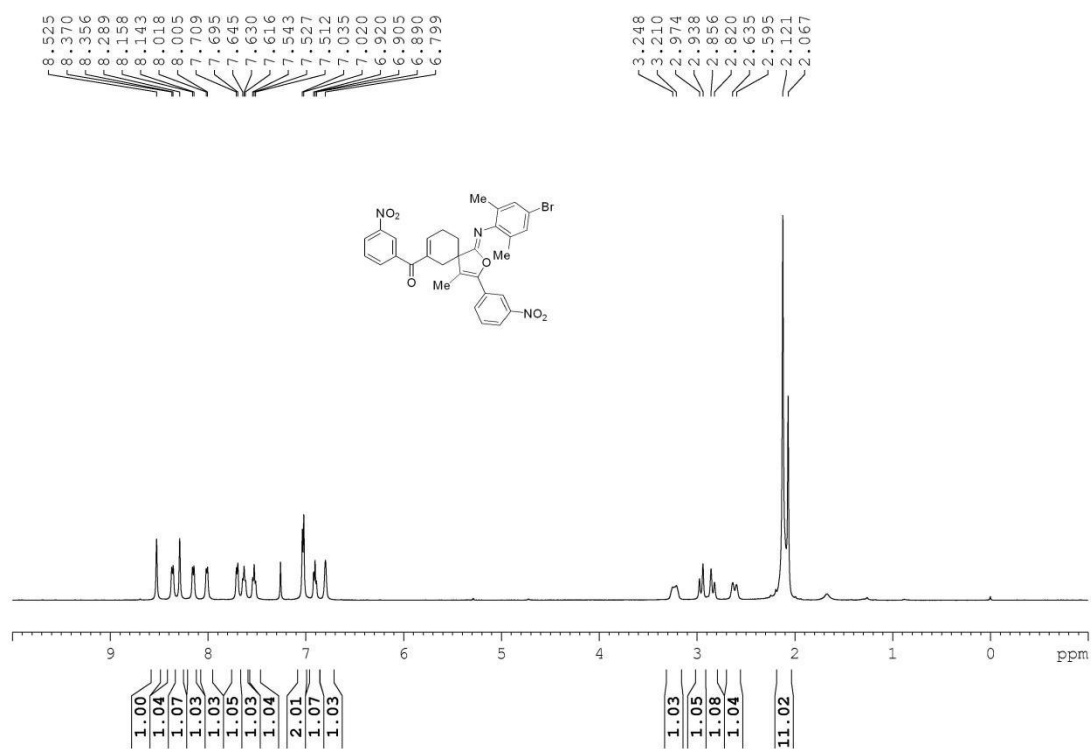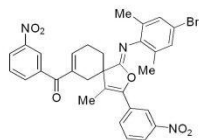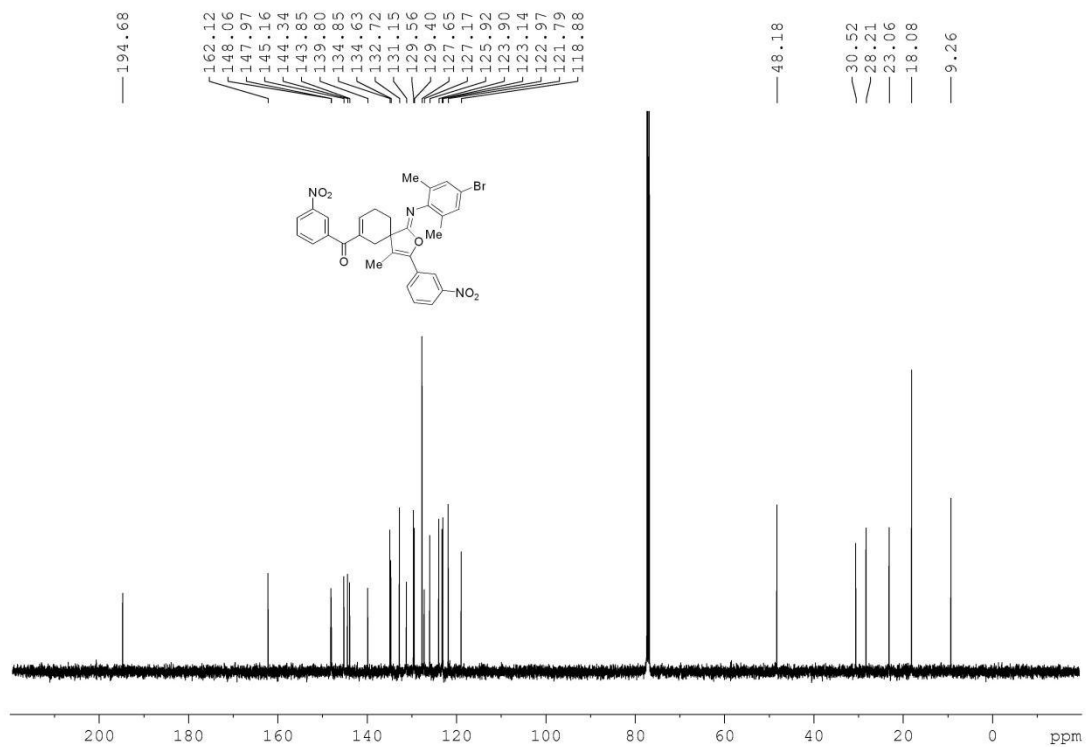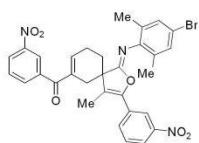

# Compound 4d

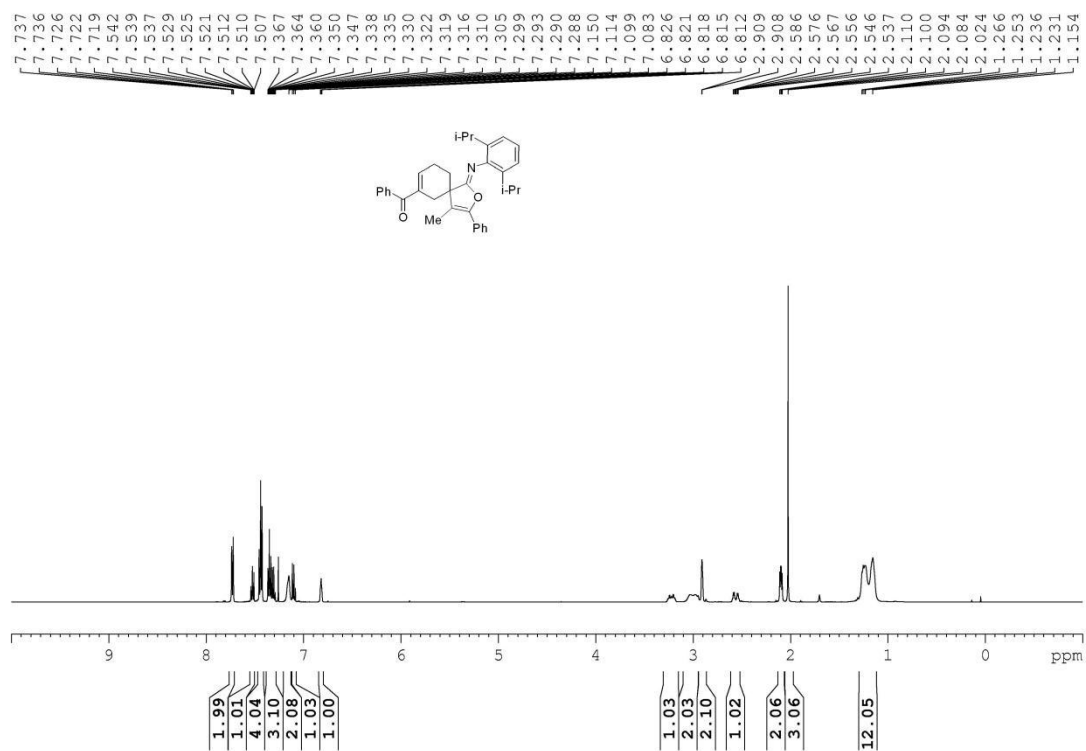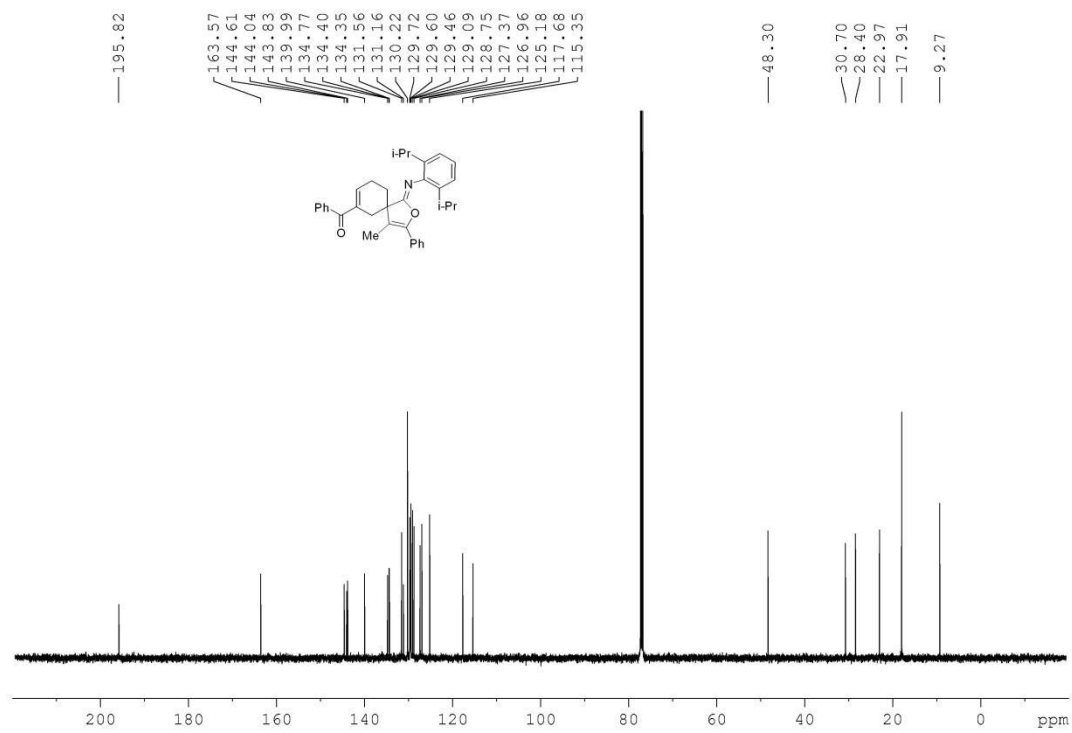

# Compound 4e

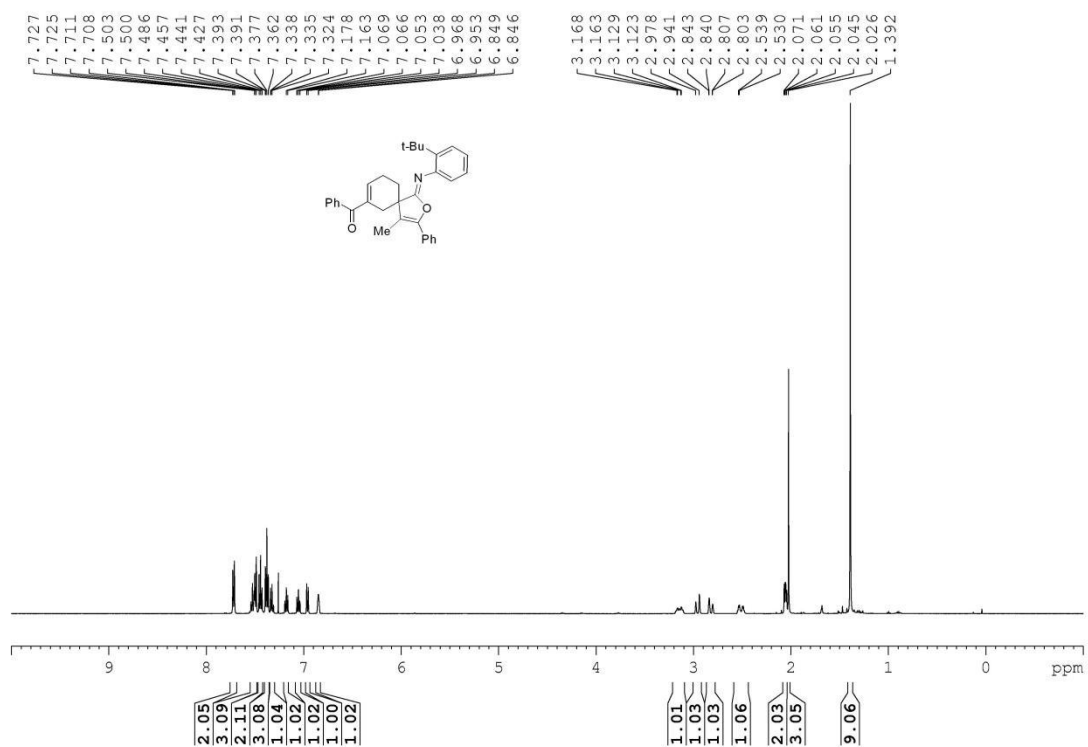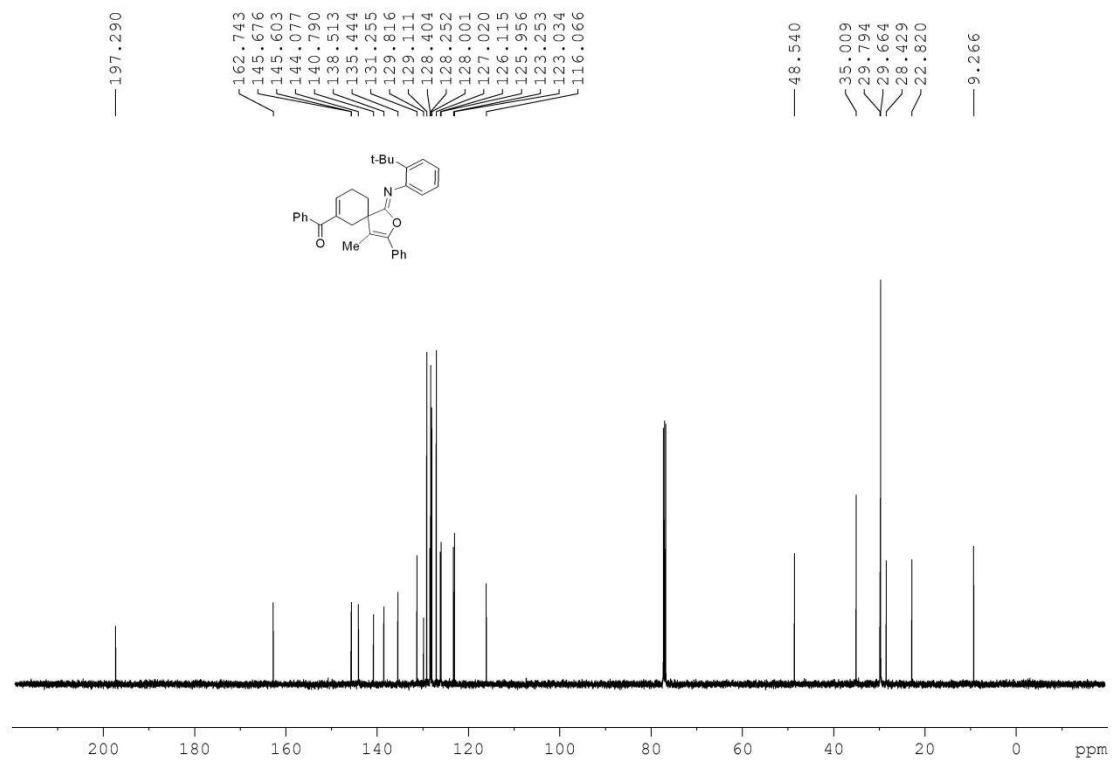

# Compound 4f

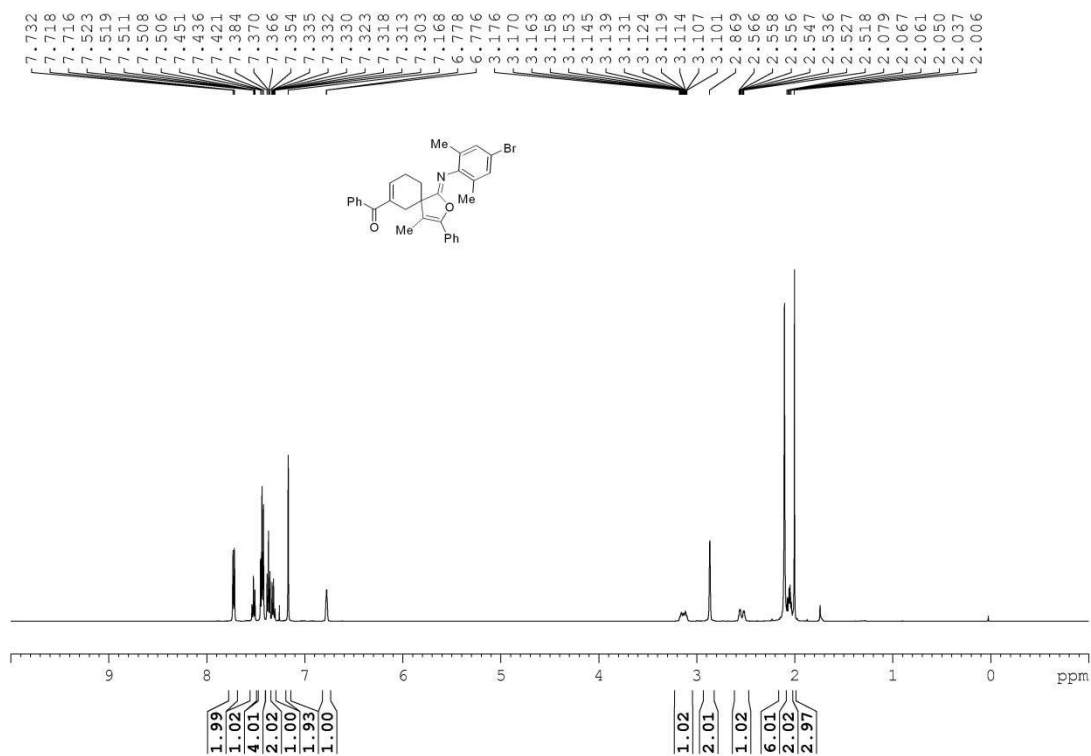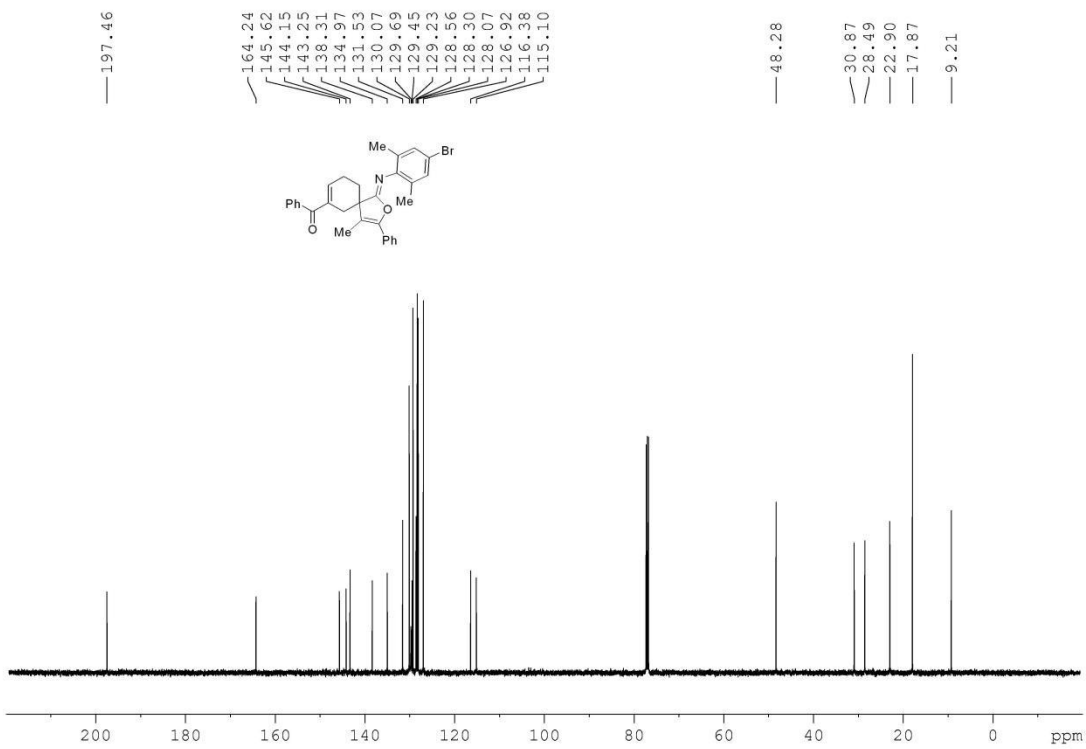

# Compound 4g

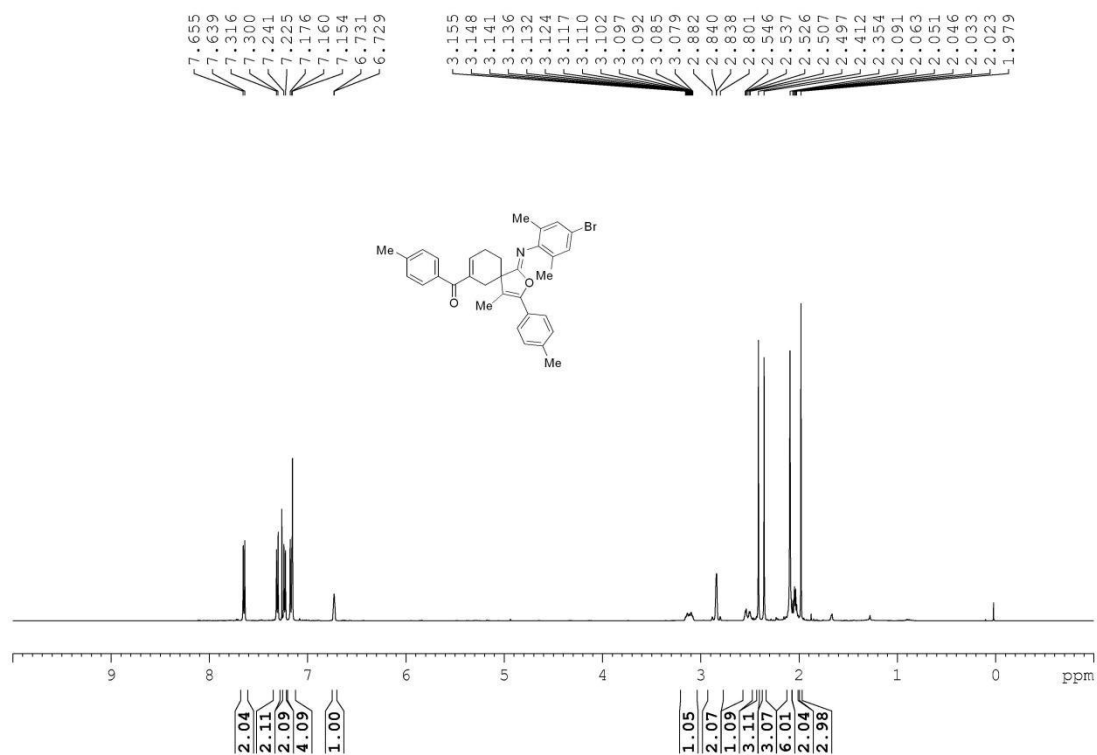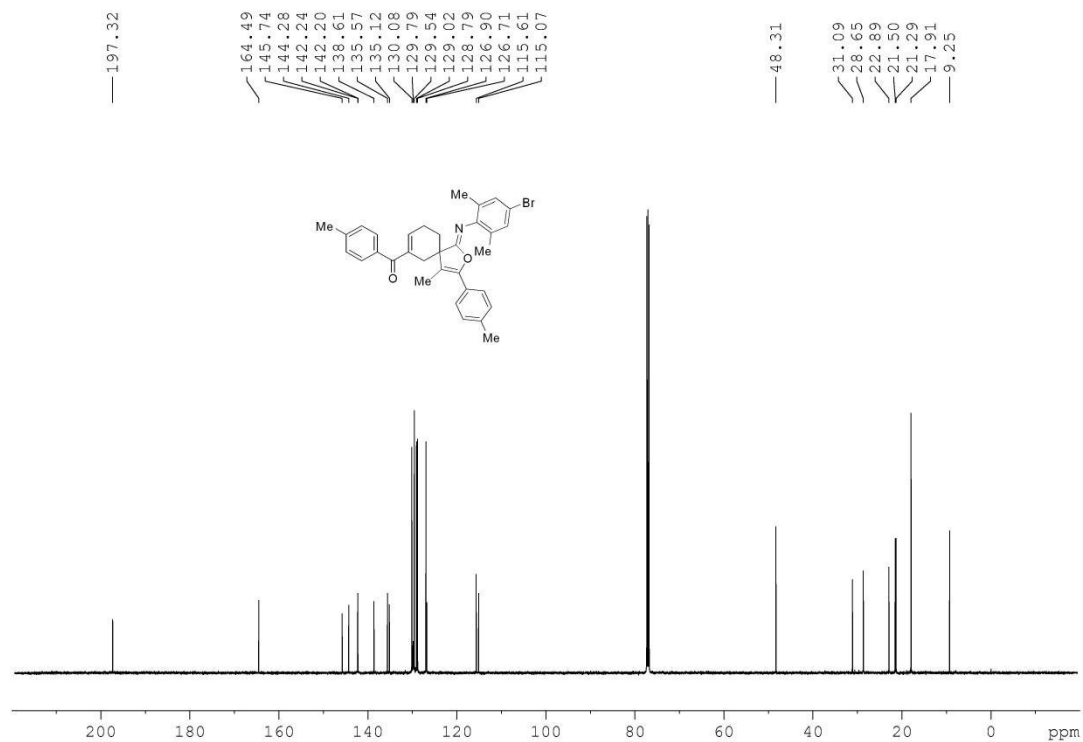

# Compound 4h

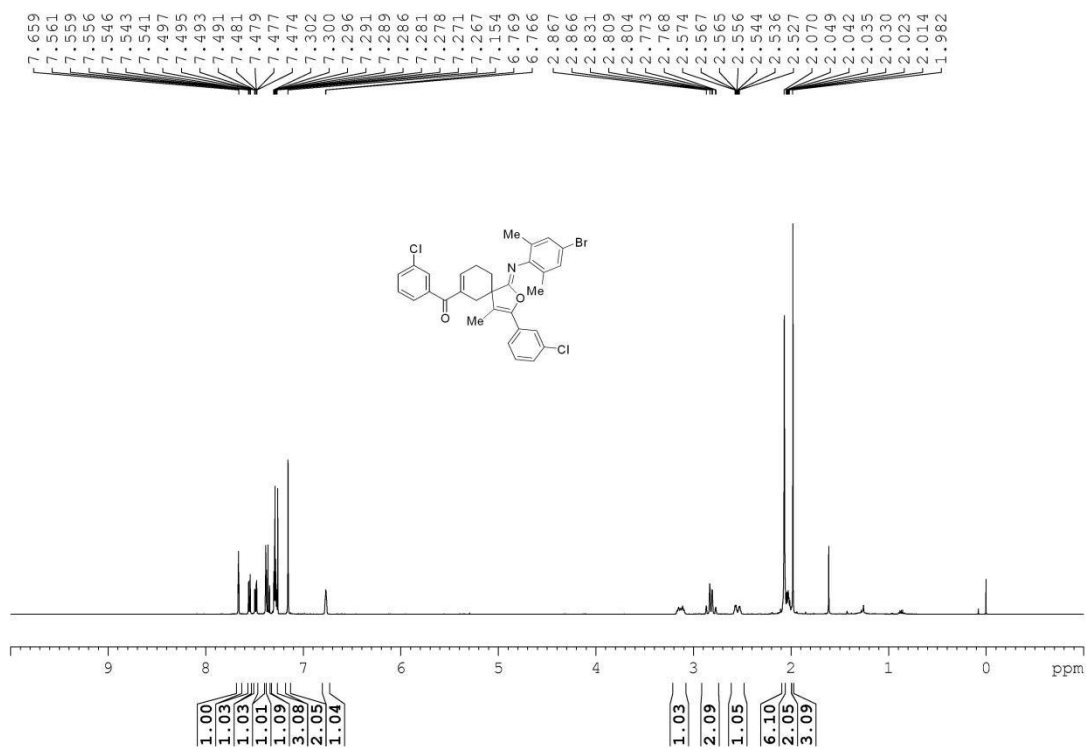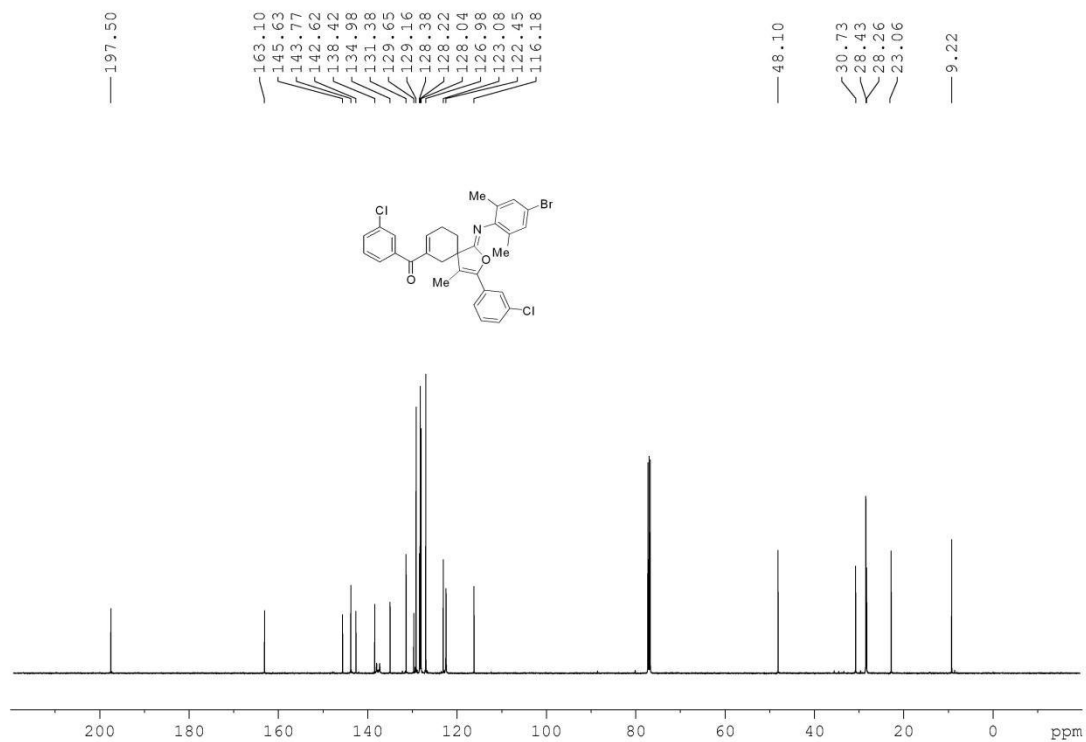

# Compound 4i

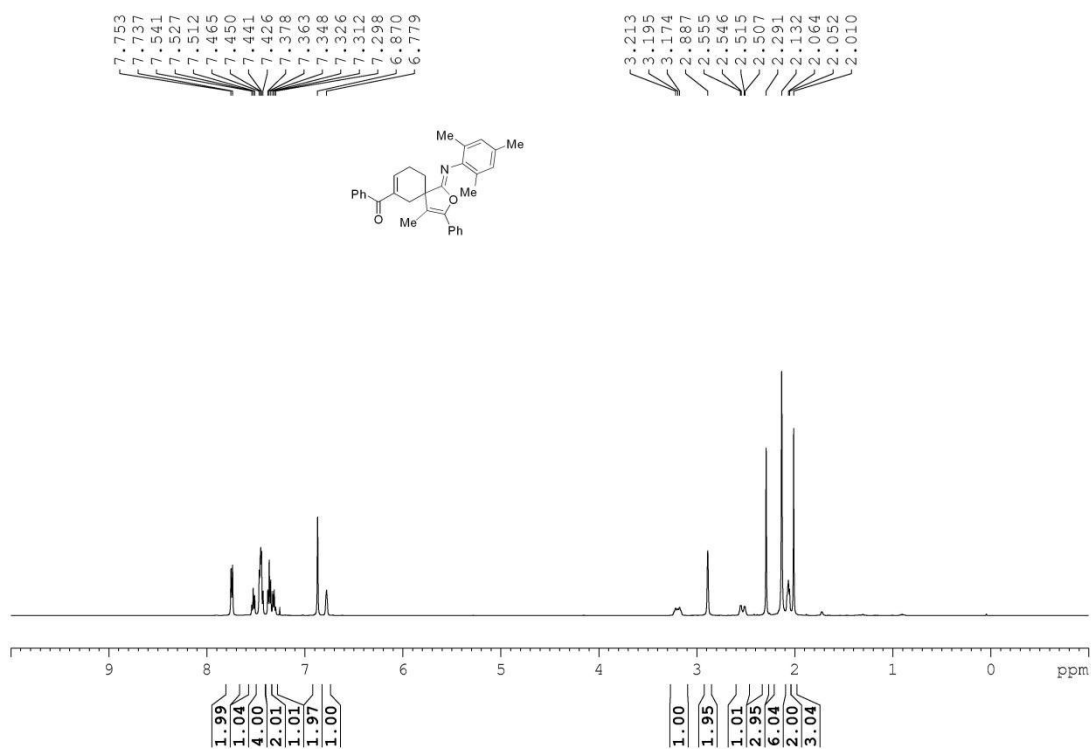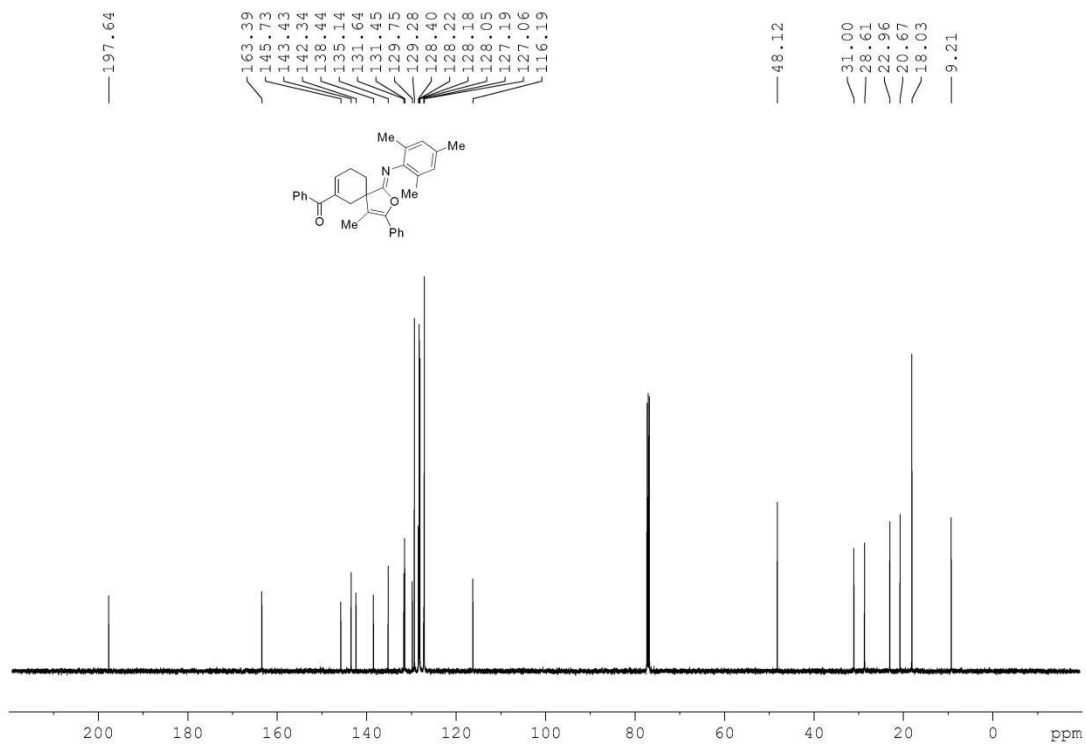

Supplement: c9cc06267j1.pdf [file c9cc06267j1.pdf]
